# Supplementary material for: Biobased, biodegradable but not bio-neutral: about the effects of polylactic acid nanoparticles on macrophages
Source: Royal Society of Chemistry journal article supplement (doi:10.1039/d4en00335g), 2024-01-01
Supplement: d4en00335g2.pdf [file d4en00335g2.pdf]

Supplementary Table 1: list of proteins detected and quantified by the proteomic screen

[illegible]ratio PL/A/c  
1153

1.133  
1.170  
0.888

0.991  
3.094

1499  
13151.216  
0.8030.942  
0.729  
1.0411.647  
0.998  
1.9411.079  
0.979  
1.277

1.072  
0.744

1.132  
1.152

1.166  
0.7711.211  
0.771  
0.9100.575  
1.182  
0.910

1.240

1.158  
1.650

0.919  
1.2181.325  
1.0641.117  
0.585  
1.1771.177  
1.008  
0.8871.168  
0.939

1.144  
0.970

0.958  
0.5121.396  
1.018  
1.000

1.033

1.024

1.531  
1.009

1.005  
0.779

0.867  
0.1521.444  
1.176  
0.9561.444  
1.989  
1.038

1.300  
0.998

1.032  
0.836

1.373  
0.619

1.182  
0.573  
0.0001.085  
1.048  
0.9981.069  
1.069  
1.400

0.982

0.436  
0.4770.869  
0.9391.053  
0.865









|       |         |                                                         |          |       |        |    |           |           |           |           |           |           |           |           |           |           |           |       |       |
|-------|---------|---------------------------------------------------------|----------|-------|--------|----|-----------|-----------|-----------|-----------|-----------|-----------|-----------|-----------|-----------|-----------|-----------|-------|-------|
| P1303 | Gen     | Gelsolin (Mus musculus)                                 | 1473.83  | 42.56 | 83942  | 24 | 137309074 | 12131416  | 117039524 | 129330256 | 144680176 | 111846048 | 111106136 | 102907700 | 104408832 | 100707020 | 0         | 0.818 |       |
| P1304 | Nen1    | Nucleophosmin (Rattus norvegicus)                       | 1070.221 | 34.49 | 32360  | 15 | 172915350 | 118701092 | 126661977 | 126661977 | 17423246  | 110358656 | 126292032 | 148157884 | 188103120 | 161034928 | 7         | 1.139 |       |
| P1349 | Tnfrsf1 | Utrilin-5, transmembrane synthase (Mus musculus)        | 52292    | 53.85 | 32560  | 13 | 16792304  | 172040022 | 146985676 | 17423246  | 17423246  | 19153388  | 19960980  | 18801800  | 26293560  | 19104568  | 11        | 0.997 |       |
| P1357 | Lept1   | 40S ribosomal protein S14 (Rattus norvegicus)           | 554.14   | 66.23 | 16259  | 10 | 44755120  | 53550788  | 552601056 | 552601056 | 60558136  | 72247255  | 44099112  | 62932556  | 62932556  | 44099112  | 11        | 0.886 |       |
| P1382 | Rac1    | Intracellular adhesion molecule 1 (Mus musculus)        | 219.88   | 12.29 | 58844  | 5  | 46161605  | 382277125 | 387126335 | 40547873  | 40547873  | 6224725   | 140640975 | 29047432  | 2467904   | 27547418  | 272829204 | 6     | 1.151 |
| P1384 | Rac1    | Myosin regulatory light chain RLC-A (Rattus norvegicus) | 381.85   | 57.06 | 19895  | 7  | 20414408  | 25207946  | 19986292  | 31917235  | 32868800  | 27878108  | 29407432  | 2467904   | 27547418  | 272829204 | 6         | 1.151 |       |
| P1406 | Dnmt1   | DNA (cytosine 5-methyltransferase 1) (Mus musculus)     | 183189   | 17.54 | 16733  | 21 | 32704400  | 32704400  | 33501478  | 33501478  | 33268680  | 32856892  | 30001202  | 34048564  | 32317016  | 33067070  | 8         | 0.968 |       |
| P1406 | Ati06   | Alpha-1 inhibitor 3 (Rattus norvegicus)                 | 1100.24  | 21.6  | 183189 | 21 | 11411656  | 89712350  | 112009404 | 112009404 | 86785200  | 87071516  | 807530048 | 77139556  | 77139556  | 774020236 | 5         | 0.756 |       |
| P1406 | S100b   | Protein S100-6 (Mus musculus)                           | 121.6    | 26.97 | 10051  | 2  | 20734508  | 11141656  | 14591929  | 114515015 | 14591929  | 17164406  | 8674882   | 31942625  | 0         | 0         | 0         | 0.396 |       |
| P1410 | C1p4    | Component C1q subcomponent subunit B (Mus musculus)     | 233.55   | 22.97 | 16675  | 5  | 9973434   | 6525290   | 10037360  | 115013501 | 11293604  | 13126660  | 10648389  | 12134538  | 11810372  | 12132949  | 6         | 1.148 |       |
| P1415 | Ra27a   | 60S ribosomal protein L27a (Mus musculus)               | 280.9    | 22.97 | 16675  | 5  | 104401960 | 61915052  | 92013640  | 47925644  | 47925644  | 149074208 | 123162736 | 205423000 | 21186560  | 188094184 | 6         | 1.587 |       |
| P1418 | Ra27b   | 60S ribosomal protein L7 (Mus musculus)                 | 643      | 64.38 | 16445  | 13 | 342054592 | 19646532  | 216678034 | 276147160 | 276147160 | 34424208  | 333991296 | 324375792 | 324375792 | 324375792 | 6         | 1.395 |       |
| P1418 | Ra27b   | 60S ribosomal protein L7 (Mus musculus)                 | 1270.7   | 50.37 | 31420  | 23 | 162687592 | 26878384  | 167659968 | 167659968 | 26878384  | 34424208  | 333991296 | 324375792 | 324375792 | 324375792 | 6         | 1.395 |       |
| P1418 | Ra27b   | 60S ribosomal protein L7 (Mus musculus)                 | 1270.7   | 50.37 | 31420  | 23 | 162687592 | 26878384  | 167659968 | 167659968 | 26878384  | 34424208  | 333991296 | 324375792 | 324375792 | 324375792 | 6         | 1.395 |       |
| P1418 | Ra27b   | 60S ribosomal protein L7 (Mus musculus)                 | 1270.7   | 50.37 | 31420  | 23 | 162687592 | 26878384  | 167659968 | 167659968 | 26878384  | 34424208  | 333991296 | 324375792 | 324375792 | 324375792 | 6         | 1.395 |       |
| P1418 | Ra27b   | 60S ribosomal protein L7 (Mus musculus)                 | 1270.7   | 50.37 | 31420  | 23 | 162687592 | 26878384  | 167659968 | 167659968 | 26878384  | 34424208  | 333991296 | 324375792 | 324375792 | 324375792 | 6         | 1.395 |       |
| P1418 | Ra27b   | 60S ribosomal protein L7 (Mus musculus)                 | 1270.7   | 50.37 | 31420  | 23 | 162687592 | 26878384  | 167659968 | 167659968 | 26878384  | 34424208  | 333991296 | 324375792 | 324375792 | 324375792 | 6         | 1.395 |       |
| P1418 | Ra27b   | 60S ribosomal protein L7 (Mus musculus)                 | 1270.7   | 50.37 | 31420  | 23 | 162687592 | 26878384  | 167659968 | 167659968 | 26878384  | 34424208  | 333991296 | 324375792 | 324375792 | 324375792 | 6         | 1.395 |       |
| P1418 | Ra27b   | 60S ribosomal protein L7 (Mus musculus)                 | 1270.7   | 50.37 | 31420  | 23 | 162687592 | 26878384  | 167659968 | 167659968 | 26878384  | 34424208  | 333991296 | 324375792 | 324375792 | 324375792 | 6         | 1.395 |       |
| P1418 | Ra27b   | 60S ribosomal protein L7 (Mus musculus)                 | 1270.7   | 50.37 | 31420  | 23 | 162687592 | 26878384  | 167659968 | 167659968 | 26878384  | 34424208  | 333991296 | 324375792 | 324375792 | 324375792 | 6         | 1.395 |       |
| P1418 | Ra27b   | 60S ribosomal protein L7 (Mus musculus)                 | 1270.7   | 50.37 | 31420  | 23 | 162687592 | 26878384  | 167659968 | 167659968 | 26878384  | 34424208  | 333991296 | 324375792 | 324375792 | 324375792 | 6         | 1.395 |       |
| P1418 | Ra27b   | 60S ribosomal protein L7 (Mus musculus)                 | 1270.7   | 50.37 | 31420  | 23 | 162687592 | 26878384  | 167659968 | 167659968 | 26878384  | 34424208  | 333991296 | 324375792 | 324375792 | 324375792 | 6         | 1.395 |       |
| P1418 | Ra27b   | 60S ribosomal protein L7 (Mus musculus)                 | 1270.7   | 50.37 | 31420  | 23 | 162687592 | 26878384  | 167659968 | 167659968 | 26878384  | 34424208  | 333991296 | 324375792 | 324375792 | 324375792 | 6         | 1.395 |       |
| P1418 | Ra27b   | 60S ribosomal protein L7 (Mus musculus)                 | 1270.7   | 50.37 | 31420  | 23 | 162687592 | 26878384  | 167659968 | 167659968 | 26878384  | 34424208  | 333991296 | 324375792 | 324375792 | 324375792 | 6         | 1.395 |       |
| P1418 | Ra27b   | 60S ribosomal protein L7 (Mus musculus)                 | 1270.7   | 50.37 | 31420  | 23 | 162687592 | 26878384  | 167659968 | 167659968 | 26878384  | 34424208  | 333991296 | 324375792 | 324375792 | 324375792 | 6         | 1.395 |       |
| P1418 | Ra27b   | 60S ribosomal protein L7 (Mus musculus)                 | 1270.7   | 50.37 | 31420  | 23 | 162687592 | 26878384  | 167659968 | 167659968 | 26878384  | 34424208  | 333991296 | 324375792 | 324375792 | 324375792 | 6         | 1.395 |       |
| P1418 | Ra27b   | 60S ribosomal protein L7 (Mus musculus)                 | 1270.7   | 50.37 | 31420  | 23 | 162687592 | 26878384  | 167659968 | 167659968 | 26878384  | 34424208  | 333991296 | 324375792 | 324375792 | 324375792 | 6         | 1.395 |       |
| P1418 | Ra27b   | 60S ribosomal protein L7 (Mus musculus)                 | 1270.7   | 50.37 | 31420  | 23 | 162687592 | 26878384  | 167659968 | 167659968 | 26878384  | 34424208  | 333991296 | 324375792 | 324375792 | 324375792 | 6         | 1.395 |       |
| P1418 | Ra27b   | 60S ribosomal protein L7 (Mus musculus)                 | 1270.7   | 50.37 | 31420  | 23 | 162687592 | 26878384  | 167659968 | 167659968 | 26878384  | 34424208  | 333991296 | 324375792 | 324375792 | 324375792 | 6         | 1.395 |       |
| P1418 | Ra27b   | 60S ribosomal protein L7 (Mus musculus)                 | 1270.7   | 50.37 | 31420  | 23 | 162687592 | 26878384  | 167659968 | 167659968 | 26878384  | 34424208  | 333991296 | 324375792 | 324375792 | 324375792 | 6         | 1.395 |       |
| P1418 | Ra27b   | 60S ribosomal protein L7 (Mus musculus)                 | 1270.7   | 50.37 | 31420  | 23 | 162687592 | 26878384  | 167659968 | 167659968 | 26878384  | 34424208  | 333991296 | 324375792 | 324375792 | 324375792 | 6         | 1.395 |       |
| P1418 | Ra27b   | 60S ribosomal protein L7 (Mus musculus)                 | 1270.7   | 50.37 | 31420  | 23 | 162687592 | 26878384  | 167659968 | 167659968 | 26878384  | 34424208  | 333991296 | 324375792 | 324375792 | 324375792 | 6         | 1.395 |       |
| P1418 | Ra27b   | 60S ribosomal protein L7 (Mus musculus)                 | 1270.7   | 50.37 | 31420  | 23 | 162687592 | 26878384  | 167659968 | 167659968 | 26878384  | 34424208  | 333991296 | 324375792 | 324375792 | 324375792 | 6         | 1.395 |       |
| P1418 | Ra27b   | 60S ribosomal protein L7 (Mus musculus)                 | 1270.7   | 50.37 | 31420  | 23 | 162687592 | 26878384  | 167659968 | 167659968 | 26878384  | 34424208  | 333991296 | 324375792 | 324375792 | 324375792 | 6         | 1.395 |       |
| P1418 | Ra27b   | 60S ribosomal protein L7 (Mus musculus)                 | 1270.7   | 50.37 | 31420  | 23 | 162687592 | 26878384  | 167659968 | 167659968 | 26878384  | 34424208  | 333991296 | 324375792 | 324375792 | 324375792 | 6         | 1.395 |       |
| P1418 | Ra27b   | 60S ribosomal protein L7 (Mus musculus)                 | 1270.7   | 50.37 | 31420  | 23 | 162687592 | 26878384  | 167659968 | 167659968 | 26878384  | 34424208  | 333991296 | 324375792 | 324375792 | 324375792 | 6         | 1.395 |       |
| P1418 | Ra27b   | 60S ribosomal protein L7 (Mus musculus)                 | 1270.7   | 50.37 | 31420  | 23 | 162687592 | 26878384  | 167659968 | 167659968 | 26878384  | 34424208  | 333991296 | 324375792 | 324375792 | 324375792 | 6         | 1.395 |       |
| P1418 | Ra27b   | 60S ribosomal protein L7 (Mus musculus)                 | 1270.7   | 50.37 | 31420  | 23 | 162687592 | 26878384  | 167659968 | 167659968 | 26878384  | 34424208  | 333991296 | 324375792 | 324375792 | 324375792 | 6         | 1.395 |       |
| P1418 | Ra27b   | 60S ribosomal protein L7 (Mus musculus)                 | 1270.7   | 50.37 | 31420  | 23 | 162687592 | 26878384  | 167659968 | 167659968 | 26878384  | 34424208  | 333991296 | 324375792 | 324375792 | 324375792 | 6         | 1.395 |       |
| P1418 | Ra27b   | 60S ribosomal protein L7 (Mus musculus)                 | 1270.7   | 50.37 | 31420  | 23 | 162687592 | 26878384  | 167659968 | 167659968 | 26878384  | 34424208  | 333991296 | 324375792 | 324375792 | 324375792 | 6         | 1.395 |       |
| P1418 | Ra27b   | 60S ribosomal protein L7 (Mus musculus)                 | 1270.7   | 50.37 | 31420  | 23 | 162687592 | 26878384  | 167659968 | 167659968 | 26878384  | 34424208  | 333991296 | 324375792 | 324375792 | 324375792 | 6         | 1.395 |       |
| P1418 | Ra27b   | 60S ribosomal protein L7 (Mus musculus)                 | 1270.7   | 50.37 | 31420  | 23 | 162687592 | 26878384  | 167659968 | 167659968 | 26878384  | 34424208  | 333991296 | 324375792 | 324375792 | 324375792 | 6         | 1.395 |       |
| P1418 | Ra27b   | 60S ribosomal protein L7 (Mus musculus)                 | 1270.7   | 50.37 | 31420  | 23 | 162687592 | 26878384  | 167659968 | 167659968 | 26878384  | 34424208  | 333991296 | 324375792 | 324375792 | 324375792 | 6         | 1.395 |       |
| P1418 | Ra27b   | 60S ribosomal protein L7 (Mus musculus)                 | 1270.7   | 50.37 | 31420  | 23 | 162687592 | 26878384  | 167659968 | 167659968 | 26878384  | 34424208  | 333991296 | 324375792 | 324375792 | 324375792 | 6         | 1.395 |       |
| P1418 | Ra27b   | 60S ribosomal protein L7 (Mus musculus)                 | 1270.7   | 50.37 | 31420  | 23 | 162687592 | 26878384  | 167659968 | 167659968 | 26878384  | 34424208  | 333991296 | 324375792 | 324375792 | 324375792 | 6         | 1.395 |       |
| P1418 | Ra27b   | 60S ribosomal protein L7 (Mus musculus)                 | 1270.7   | 50.37 | 31420  | 23 | 162687592 | 26878384  | 167659968 | 167659968 | 26878384  | 34424208  | 333991296 | 324375792 | 324375792 | 324375792 | 6         | 1.395 |       |
| P1418 | Ra27b   | 60S ribosomal protein L7 (Mus musculus)                 | 1270.7   | 50.37 | 31420  | 23 | 162687592 | 26878384  | 167659968 | 167659968 | 26878384  | 34424208  | 333991296 | 324375792 | 324375792 | 324375792 | 6         | 1.395 |       |
| P1418 | Ra27b   | 60S ribosomal protein L7 (Mus musculus)                 | 1270.7   | 50.37 | 31420  | 23 | 162687592 | 26878384  | 167659968 | 167659968 | 26878384  | 34424208  | 333991296 | 324375792 | 324375792 | 324375792 | 6         | 1.395 |       |
| P1418 | Ra27b   | 60S ribosomal protein L7 (Mus musculus)                 | 1270.7   | 50.37 | 31420  | 23 | 162687592 | 26878384  | 167659968 | 167659968 | 26878384  | 34424208  | 333991296 | 324375792 | 324375792 | 324375792 | 6         | 1.395 |       |
| P1418 | Ra27b   | 60S ribosomal protein L7 (Mus musculus)                 | 1270.7   | 50.37 | 31420  | 23 | 162687592 | 26878384  | 167659968 | 167659968 | 26878384  | 34424208  | 333991296 | 324375792 | 324375792 | 324375792 | 6         | 1.395 |       |
| P1418 | Ra27b   | 60S ribosomal protein L7 (Mus musculus)                 | 1270.7   | 50.37 | 31420  | 23 | 162687592 | 26878384  | 167659968 | 167659968 | 26878384  | 34424208  | 333991296 | 324375792 | 324375792 | 324375792 | 6         | 1.395 |       |
| P1418 | Ra27b   | 60S ribosomal protein L7 (Mus musculus)                 | 1270.7   | 50.37 | 31420  | 23 | 162687592 | 26878384  | 167659968 | 167659968 | 26878384  | 34424208  | 333991296 | 324375792 | 324375792 | 324375792 | 6         | 1.395 |       |
| P1418 | Ra27b   | 60S ribosomal protein L7 (Mus musculus)                 | 1270.7   | 50.37 | 31420  | 23 | 162687592 | 26878384  | 167659968 | 167659968 | 26878384  | 34424208  | 333991296 | 324375792 | 324375792 | 324375792 | 6         | 1.395 |       |
| P1418 | Ra27b   | 60S ribosomal protein L7 (Mus musculus)                 | 1270.7   | 50.37 | 31420  | 23 | 162687592 | 26878384  | 167659968 | 167659968 | 26878384  | 34424208  | 3339      |           |           |           |           |       |       |

|        |        |                                                                        |         |       |        |    |           |            |             |            |           |            |            |            |          |       |
|--------|--------|------------------------------------------------------------------------|---------|-------|--------|----|-----------|------------|-------------|------------|-----------|------------|------------|------------|----------|-------|
| P2167b | P2167b | Proenzyme subtilisin alpha type-4 (Rattus norvegicus)                  | 608.78  | 51.64 | 29.08  | 10 | 40193720  | 50596352   | 4337.8880   | 40734428   | 58955472  | 43873464   | 54176052   | 58124584   | 58470420 | 1.139 |
| P2170b | Map3b  | Microg activated protein kinase 3 (Rattus norvegicus)                  | 441.45  | 30.26 | 4.081  | 8  | 16149072  | 10813980   | 16520060    | 17852298   | 13672938  | 14018353   | 14166844   | 9426707    | 16492616 | 0.913 |
| P2195b | Map8   | Arabinoside transporter 1 (Mus musculus)                               | 488.98  | 29.16 | 51241  | 11 | 25654000  | 1880855    | 22511134    | 20476166   | 16485210  | 22609764   | 22590764   | 22590764   | 1.063    |       |
| P2216b | Map8b  | Arabinoside transporter 1 (Mus musculus)                               | 285.01  | 12.15 | 78664  | 5  | 184817.25 | 1880855    | 25144395    | 1699571.12 | 17929662  | 25669344   | 25669344   | 25669344   | 1.436    |       |
| P22437 | Pap1   | Myosin differentiation primary response protein (MDP88) (Mus musculus) | 119.17  | 8.11  | 33753  | 2  | 548165.69 | 184817.25  | 1880855     | 1880855    | 197477.81 | 269777.81  | 269777.81  | 269777.81  | 1.291    |       |
| P22437 | Pap1   | Prostaglandin G/H synthase 1 (Mus musculus)                            | 765.27  | 32.36 | 69042  | 13 | 156071.91 | 25358186   | 30604222    | 26330834   | 26330834  | 26330834   | 26330834   | 26330834   | 0.937    |       |
| P22437 | Pap1   | RNA 2'-O-methyltransferase (Hbflman) (Rattus norvegicus)               | 659.53  | 51.38 | 34222  | 13 | 552099.92 | 552099.92  | 50690923    | 45378620   | 45378620  | 45378620   | 45378620   | 45378620   | 0.974    |       |
| P22482 | Ch1    | AP-1 complex subunit gamma-1 (Mus musculus)                            | 115.49  | 3.18  | 100564 | 2  | 148185.12 | 156541.12  | 11530061.12 | 9233538.62 | 899416.44 | 1765901.75 | 1765901.75 | 1765901.75 | 1.201    |       |
| P22497 | Ap1g1  | AP-1 complex subunit gamma-1 (Mus musculus)                            | 575.51  | 19.1  | 91350  | 18 | 8827508   | 10704848   | 9798925     | 15064366   | 15064366  | 15064366   | 15064366   | 15064366   | 0.876    |       |
| P22907 | Hmbs   | Polysialyltransferase (Mus musculus)                                   | 287.28  | 21.61 | 39344  | 12 | 4330935   | 3842782    | 40705675    | 3436519375 | 3697292.5 | 44003379   | 44003379   | 44003379   | 0.883    |       |
| P22907 | Hmbs   | Polysialyltransferase (Mus musculus)                                   | 293.63  | 5.41  | 164243 | 6  | 3079745   | 542345     | 426348      | 619307.5   | 3254817   | 3254817    | 3254817    | 3254817    | 0.818    |       |
| P23116 | Etkb   | Karlin-like domain-containing protein 2 (Rattus norvegicus)            | 1133.60 | 19.94 | 161936 | 20 | 26572452  | 26572452   | 2523882     | 36046406   | 2523882   | 36046406   | 2523882    | 36046406   | 1.116    |       |
| P23198 | Chac   | Chromatin protein homolog 3 (Mus musculus)                             | 639.69  | 42.62 | 20653  | 9  | 17595912  | 3307066    | 2420872     | 38888084   | 2420872   | 38888084   | 2420872    | 38888084   | 0.800    |       |
| P2320b | Map10  | Protein kinase NOV-10 (Rattus norvegicus)                              | 258.54  | 1.88  | 113388 | 4  | 180291.88 | 1780851.12 | 2760405     | 300256     | 12574076  | 2760405    | 300256     | 12574076   | 1.191    |       |
| P2320b | Map10  | Protein kinase NOV-10 (Rattus norvegicus)                              | 258.54  | 1.88  | 113388 | 4  | 180291.88 | 1780851.12 | 2760405     | 300256     | 12574076  | 2760405    | 300256     | 12574076   | 1.191    |       |
| P2320b | Map10  | Protein kinase NOV-10 (Rattus norvegicus)                              | 258.54  | 1.88  | 113388 | 4  | 180291.88 | 1780851.12 | 2760405     | 300256     | 12574076  | 2760405    | 300256     | 12574076   | 1.191    |       |
| P2320b | Map10  | Protein kinase NOV-10 (Rattus norvegicus)                              | 258.54  | 1.88  | 113388 | 4  | 180291.88 | 1780851.12 | 2760405     | 300256     | 12574076  | 2760405    | 300256     | 12574076   | 1.191    |       |
| P2320b | Map10  | Protein kinase NOV-10 (Rattus norvegicus)                              | 258.54  | 1.88  | 113388 | 4  | 180291.88 | 1780851.12 | 2760405     | 300256     | 12574076  | 2760405    | 300256     | 12574076   | 1.191    |       |
| P2320b | Map10  | Protein kinase NOV-10 (Rattus norvegicus)                              | 258.54  | 1.88  | 113388 | 4  | 180291.88 | 1780851.12 | 2760405     | 300256     | 12574076  | 2760405    | 300256     | 12574076   | 1.191    |       |
| P2320b | Map10  | Protein kinase NOV-10 (Rattus norvegicus)                              | 258.54  | 1.88  | 113388 | 4  | 180291.88 | 1780851.12 | 2760405     | 300256     | 12574076  | 2760405    | 300256     | 12574076   | 1.191    |       |
| P2320b | Map10  | Protein kinase NOV-10 (Rattus norvegicus)                              | 258.54  | 1.88  | 113388 | 4  | 180291.88 | 1780851.12 | 2760405     | 300256     | 12574076  | 2760405    | 300256     | 12574076   | 1.191    |       |
| P2320b | Map10  | Protein kinase NOV-10 (Rattus norvegicus)                              | 258.54  | 1.88  | 113388 | 4  | 180291.88 | 1780851.12 | 2760405     | 300256     | 12574076  | 2760405    | 300256     | 12574076   | 1.191    |       |
| P2320b | Map10  | Protein kinase NOV-10 (Rattus norvegicus)                              | 258.54  | 1.88  | 113388 | 4  | 180291.88 | 1780851.12 | 2760405     | 300256     | 12574076  | 2760405    | 300256     | 12574076   | 1.191    |       |
| P2320b | Map10  | Protein kinase NOV-10 (Rattus norvegicus)                              | 258.54  | 1.88  | 113388 | 4  | 180291.88 | 1780851.12 | 2760405     | 300256     | 12574076  | 2760405    | 300256     | 12574076   | 1.191    |       |
| P2320b | Map10  | Protein kinase NOV-10 (Rattus norvegicus)                              | 258.54  | 1.88  | 113388 | 4  | 180291.88 | 1780851.12 | 2760405     | 300256     | 12574076  | 2760405    | 300256     | 12574076   | 1.191    |       |
| P2320b | Map10  | Protein kinase NOV-10 (Rattus norvegicus)                              | 258.54  | 1.88  | 113388 | 4  | 180291.88 | 1780851.12 | 2760405     | 300256     | 12574076  | 2760405    | 300256     | 12574076   | 1.191    |       |
| P2320b | Map10  | Protein kinase NOV-10 (Rattus norvegicus)                              | 258.54  | 1.88  | 113388 | 4  | 180291.88 | 1780851.12 | 2760405     | 300256     | 12574076  | 2760405    | 300256     | 12574076   | 1.191    |       |
| P2320b | Map10  | Protein kinase NOV-10 (Rattus norvegicus)                              | 258.54  | 1.88  | 113388 | 4  | 180291.88 | 1780851.12 | 2760405     | 300256     | 12574076  | 2760405    | 300256     | 12574076   | 1.191    |       |
| P2320b | Map10  | Protein kinase NOV-10 (Rattus norvegicus)                              | 258.54  | 1.88  | 113388 | 4  | 180291.88 | 1780851.12 | 2760405     | 300256     | 12574076  | 2760405    | 300256     | 12574076   | 1.191    |       |
| P2320b | Map10  | Protein kinase NOV-10 (Rattus norvegicus)                              | 258.54  | 1.88  | 113388 | 4  | 180291.88 | 1780851.12 | 2760405     | 300256     | 12574076  | 2760405    | 300256     | 12574076   | 1.191    |       |
| P2320b | Map10  | Protein kinase NOV-10 (Rattus norvegicus)                              | 258.54  | 1.88  | 113388 | 4  | 180291.88 | 1780851.12 | 2760405     | 300256     | 12574076  | 2760405    | 300256     | 12574076   | 1.191    |       |
| P2320b | Map10  | Protein kinase NOV-10 (Rattus norvegicus)                              | 258.54  | 1.88  | 113388 | 4  | 180291.88 | 1780851.12 | 2760405     | 300256     | 12574076  | 2760405    | 300256     | 12574076   | 1.191    |       |
| P2320b | Map10  | Protein kinase NOV-10 (Rattus norvegicus)                              | 258.54  | 1.88  | 113388 | 4  | 180291.88 | 1780851.12 | 2760405     | 300256     | 12574076  | 2760405    | 300256     | 12574076   | 1.191    |       |
| P2320b | Map10  | Protein kinase NOV-10 (Rattus norvegicus)                              | 258.54  | 1.88  | 113388 | 4  | 180291.88 | 1780851.12 | 2760405     | 300256     | 12574076  | 2760405    | 300256     | 12574076   | 1.191    |       |
| P2320b | Map10  | Protein kinase NOV-10 (Rattus norvegicus)                              | 258.54  | 1.88  | 113388 | 4  | 180291.88 | 1780851.12 | 2760405     | 300256     | 12574076  | 2760405    | 300256     | 12574076   | 1.191    |       |
| P2320b | Map10  | Protein kinase NOV-10 (Rattus norvegicus)                              | 258.54  | 1.88  | 113388 | 4  | 180291.88 | 1780851.12 | 2760405     | 300256     | 12574076  | 2760405    | 300256     | 12574076   | 1.191    |       |
| P2320b | Map10  | Protein kinase NOV-10 (Rattus norvegicus)                              | 258.54  | 1.88  | 113388 | 4  | 180291.88 | 1780851.12 | 2760405     | 300256     | 12574076  | 2760405    | 300256     | 12574076   | 1.191    |       |
| P2320b | Map10  | Protein kinase NOV-10 (Rattus norvegicus)                              | 258.54  | 1.88  | 113388 | 4  | 180291.88 | 1780851.12 | 2760405     | 300256     | 12574076  | 2760405    | 300256     | 12574076   | 1.191    |       |
| P2320b | Map10  | Protein kinase NOV-10 (Rattus norvegicus)                              | 258.54  | 1.88  | 113388 | 4  | 180291.88 | 1780851.12 | 2760405     | 300256     | 12574076  | 2760405    | 300256     | 12574076   | 1.191    |       |
| P2320b | Map10  | Protein kinase NOV-10 (Rattus norvegicus)                              | 258.54  | 1.88  | 113388 | 4  | 180291.88 | 1780851.12 | 2760405     | 300256     | 12574076  | 2760405    | 300256     | 12574076   | 1.191    |       |
| P2320b | Map10  | Protein kinase NOV-10 (Rattus norvegicus)                              | 258.54  | 1.88  | 113388 | 4  | 180291.88 | 1780851.12 | 2760405     | 300256     | 12574076  | 2760405    | 300256     | 12574076   | 1.191    |       |
| P2320b | Map10  | Protein kinase NOV-10 (Rattus norvegicus)                              | 258.54  | 1.88  | 113388 | 4  | 180291.88 | 1780851.12 | 2760405     | 300256     | 12574076  | 2760405    | 300256     | 12574076   | 1.191    |       |
| P2320b | Map10  | Protein kinase NOV-10 (Rattus norvegicus)                              | 258.54  | 1.88  | 113388 | 4  | 180291.88 | 1780851.12 | 2760405     | 300256     | 12574076  | 2760405    | 300256     | 12574076   | 1.191    |       |
| P2320b | Map10  | Protein kinase NOV-10 (Rattus norvegicus)                              | 258.54  | 1.88  | 113388 | 4  | 180291.88 | 1780851.12 | 2760405     | 300256     | 12574076  | 2760405    | 300256     | 12574076   | 1.191    |       |
| P2320b | Map10  | Protein kinase NOV-10 (Rattus norvegicus)                              | 258.54  | 1.88  | 113388 | 4  | 180291.88 | 1780851.12 | 2760405     | 300256     | 12574076  | 2760405    | 300256     | 12574076   | 1.191    |       |
| P2320b | Map10  | Protein kinase NOV-10 (Rattus norvegicus)                              | 258.54  | 1.88  | 113388 | 4  | 180291.88 | 1780851.12 | 2760405     | 300256     | 12574076  | 2760405    | 300256     | 12574076   | 1.191    |       |
| P2320b | Map10  | Protein kinase NOV-10 (Rattus norvegicus)                              | 258.54  | 1.88  | 113388 | 4  | 180291.88 | 1780851.12 | 2760405     | 300256     | 12574076  | 2760405    | 300256     | 12574076   | 1.191    |       |
| P2320b | Map10  | Protein kinase NOV-10 (Rattus norvegicus)                              | 258.54  | 1.88  | 113388 | 4  | 180291.88 | 1780851.12 | 2760405     | 300256     | 12574076  | 2760405    | 300256     | 12574076   | 1.191    |       |
| P2320b | Map10  | Protein kinase NOV-10 (Rattus norvegicus)                              | 258.54  | 1.88  | 113388 | 4  | 180291.88 | 1780851.12 | 2760405     | 300256     | 12574076  | 2760405    | 300256     | 12574076   | 1.191    |       |
| P2320b | Map10  | Protein kinase NOV-10 (Rattus norvegicus)                              | 258.54  | 1.88  | 113388 | 4  | 180291.88 | 1780851.12 | 2760405     | 300256     | 12574076  | 2760405    | 300256     | 12574076   | 1.191    |       |
| P2320b | Map10  | Protein kinase NOV-10 (Rattus norvegicus)                              | 258.54  | 1.88  | 113388 | 4  | 180291.88 | 1780851.12 | 2760405     | 300256     | 12574076  | 2760405    | 300256     | 12574076   | 1.191    |       |
| P2320b | Map10  | Protein kinase NOV-10 (Rattus norvegicus)                              | 258.54  | 1.88  | 113388 | 4  | 180291.88 | 1780851.12 | 2760405     | 300256     | 12574076  | 2760405    | 300256     | 12574076   | 1.191    |       |
| P2320b | Map10  | Protein kinase NOV-10 (Rattus norvegicus)                              | 258.54  | 1.88  | 113388 | 4  | 180291.88 | 1780851.12 | 2760405     | 300256     | 12574076  | 2760405    | 300256     | 12574076   | 1.191    |       |
| P2320b | Map10  | Protein kinase NOV-10 (Rattus norvegicus)                              | 258.54  | 1.88  | 113388 | 4  | 180291.88 | 1780851.12 | 2760405     | 300256     | 12574076  | 2760405    | 300256     | 12574076   | 1.191    |       |
| P2320b | Map10  | Protein kinase NOV-10 (Rattus norvegicus)                              | 258.54  | 1.88  | 113388 | 4  | 180291.88 | 1780851.12 | 2760405     | 300256     | 12574076  | 2760405    | 300256     | 12574076   | 1.191    |       |
| P2320b | Map10  | Protein kinase NOV-10 (Rattus norvegicus)                              | 258.54  | 1.88  | 113388 | 4  | 180291.88 | 1780851.12 | 2760405     | 300256     | 12574076  | 2760405    | 300256     | 12574076   | 1.191    |       |
| P2320b | Map10  | Protein kinase NOV-10 (Rattus norvegicus)                              | 258.54  | 1.88  | 113388 | 4  | 180291.88 | 1780851.12 | 2760405     | 300256     | 12574076  | 2760405    | 300256     | 12574076   | 1.191    |       |
| P2320b | Map10  | Protein kinase NOV-10 (Rattus norvegicus)                              | 258.54  | 1.88  | 113388 | 4  | 180291.88 | 1780851.12 | 2760405     | 300256     | 12574076  | 2760405    | 300256     | 12574076   | 1.191    |       |
| P2320b | Map10  | Protein kinase NOV-10 (Rattus norvegicus)                              | 258.54  | 1.88  | 113388 | 4  | 180291.88 | 1780851.12 | 2760405     | 300256     | 12574076  | 2760405    | 300256     | 12574076   | 1.191    |       |
| P2320b | Map10  | Protein kinase NOV-10 (Rattus norvegicus)                              | 258.54  | 1.88  | 113388 | 4  | 180291.88 | 1780851.12 | 2760405     | 300256     | 12574076  | 2760405    | 300256     | 12574076   | 1.191    |       |
| P2320b | Map10  | Protein kinase NOV-10 (Rattus norvegicus)                              | 258.54  | 1.88  | 113388 | 4  | 180291.88 | 1780851.12 | 2760405     | 300256     | 12574076  | 2760405    | 300256     | 12574076   | 1.191    |       |
| P2320b | Map10  | Protein kinase NOV-10 (Rattus norvegicus)                              | 258.54  | 1.88  | 113388 | 4  | 180291.88 | 1780851.12 | 2760405     | 300256     | 12574076  | 2760405    | 300256     | 12574076   | 1.191    |       |
| P2320b | Map10  | Protein kinase NOV-10 (Rattus norvegicus)                              | 258.54  | 1.88  | 113388 | 4  | 180291.88 | 1780851.12 | 2760405     | 300256     | 12574076  | 2760405    | 300256     | 12574076   | 1.191    |       |
| P2320b | Map10  | Protein kinase NOV-10 (Rattus norvegicus)                              | 258.54  | 1.88  | 113388 | 4  | 180291.88 | 1780851.12 | 2760405     | 300256     | 12574076  | 2760405    | 300256     | 12574076   | 1.191    |       |
| P2320b | Map10  | Protein kinase NOV-10 (Rattus norvegicus)                              | 258.54  | 1.88  | 113388 | 4  | 180291.88 | 1780851.12 | 2760405     | 300256     | 12574076  | 2760405    | 300256     | 12574076   | 1.191    |       |
| P232   |        |                                                                        |         |       |        |    |           |            |             |            |           |            |            |            |          |       |



|        |        |        |        |        |        |        |        |        |        |        |        |        |        |        |        |        |        |        |        |        |        |        |        |        |        |        |        |        |        |        |        |        |        |        |        |        |        |        |        |        |        |        |        |        |        |        |        |        |        |        |        |        |        |        |        |        |        |        |        |        |        |        |        |        |        |        |        |        |        |        |        |        |        |        |        |        |        |        |        |        |        |        |        |        |        |        |        |        |        |        |        |        |        |        |        |        |        |        |        |        |        |        |        |        |        |        |        |        |        |        |        |        |        |        |        |        |        |        |        |        |        |        |        |        |        |        |        |        |        |        |        |        |        |        |        |        |        |        |        |        |        |        |        |        |        |        |        |        |        |        |        |        |        |        |        |        |        |        |        |        |        |        |        |        |        |        |        |        |        |        |        |        |        |        |        |        |        |        |        |        |        |        |        |        |        |        |        |        |        |        |        |        |        |        |        |        |        |        |        |        |        |        |        |        |        |        |        |        |        |        |        |        |        |        |        |        |        |        |        |        |        |        |        |        |        |        |        |        |        |        |        |        |        |        |        |        |        |        |        |        |        |        |        |        |        |        |        |        |        |        |        |        |        |        |        |        |        |        |        |        |        |        |        |        |        |        |        |        |        |        |        |        |        |        |        |        |        |        |        |        |        |        |        |        |        |        |        |        |        |        |        |        |        |        |        |        |        |        |        |        |        |        |        |        |        |        |        |        |        |        |        |        |        |        |        |        |        |        |        |        |        |        |        |        |        |        |        |        |        |        |        |        |        |        |        |        |        |        |        |        |        |        |        |        |        |        |        |        |        |        |        |        |        |        |        |        |        |        |        |        |        |        |        |        |        |        |        |        |        |        |        |
|--------|--------|--------|--------|--------|--------|--------|--------|--------|--------|--------|--------|--------|--------|--------|--------|--------|--------|--------|--------|--------|--------|--------|--------|--------|--------|--------|--------|--------|--------|--------|--------|--------|--------|--------|--------|--------|--------|--------|--------|--------|--------|--------|--------|--------|--------|--------|--------|--------|--------|--------|--------|--------|--------|--------|--------|--------|--------|--------|--------|--------|--------|--------|--------|--------|--------|--------|--------|--------|--------|--------|--------|--------|--------|--------|--------|--------|--------|--------|--------|--------|--------|--------|--------|--------|--------|--------|--------|--------|--------|--------|--------|--------|--------|--------|--------|--------|--------|--------|--------|--------|--------|--------|--------|--------|--------|--------|--------|--------|--------|--------|--------|--------|--------|--------|--------|--------|--------|--------|--------|--------|--------|--------|--------|--------|--------|--------|--------|--------|--------|--------|--------|--------|--------|--------|--------|--------|--------|--------|--------|--------|--------|--------|--------|--------|--------|--------|--------|--------|--------|--------|--------|--------|--------|--------|--------|--------|--------|--------|--------|--------|--------|--------|--------|--------|--------|--------|--------|--------|--------|--------|--------|--------|--------|--------|--------|--------|--------|--------|--------|--------|--------|--------|--------|--------|--------|--------|--------|--------|--------|--------|--------|--------|--------|--------|--------|--------|--------|--------|--------|--------|--------|--------|--------|--------|--------|--------|--------|--------|--------|--------|--------|--------|--------|--------|--------|--------|--------|--------|--------|--------|--------|--------|--------|--------|--------|--------|--------|--------|--------|--------|--------|--------|--------|--------|--------|--------|--------|--------|--------|--------|--------|--------|--------|--------|--------|--------|--------|--------|--------|--------|--------|--------|--------|--------|--------|--------|--------|--------|--------|--------|--------|--------|--------|--------|--------|--------|--------|--------|--------|--------|--------|--------|--------|--------|--------|--------|--------|--------|--------|--------|--------|--------|--------|--------|--------|--------|--------|--------|--------|--------|--------|--------|--------|--------|--------|--------|--------|--------|--------|--------|--------|--------|--------|--------|--------|--------|--------|--------|--------|--------|--------|--------|--------|--------|--------|--------|--------|--------|--------|--------|--------|--------|--------|--------|--------|--------|--------|--------|--------|--------|--------|--------|--------|--------|--------|--------|--------|--------|--------|--------|--------|--------|--------|--------|--------|--------|--------|--------|--------|--------|--------|--------|--------|--------|--------|--------|--------|--------|--------|--------|--------|--------|--------|--------|--------|--------|--------|--------|--------|--------|--------|
| 943828 | 943829 | 943830 | 943831 | 943832 | 943833 | 943834 | 943835 | 943836 | 943837 | 943838 | 943839 | 943840 | 943841 | 943842 | 943843 | 943844 | 943845 | 943846 | 943847 | 943848 | 943849 | 943850 | 943851 | 943852 | 943853 | 943854 | 943855 | 943856 | 943857 | 943858 | 943859 | 943860 | 943861 | 943862 | 943863 | 943864 | 943865 | 943866 | 943867 | 943868 | 943869 | 943870 | 943871 | 943872 | 943873 | 943874 | 943875 | 943876 | 943877 | 943878 | 943879 | 943880 | 943881 | 943882 | 943883 | 943884 | 943885 | 943886 | 943887 | 943888 | 943889 | 943890 | 943891 | 943892 | 943893 | 943894 | 943895 | 943896 | 943897 | 943898 | 943899 | 943900 | 943901 | 943902 | 943903 | 943904 | 943905 | 943906 | 943907 | 943908 | 943909 | 943910 | 943911 | 943912 | 943913 | 943914 | 943915 | 943916 | 943917 | 943918 | 943919 | 943920 | 943921 | 943922 | 943923 | 943924 | 943925 | 943926 | 943927 | 943928 | 943929 | 943930 | 943931 | 943932 | 943933 | 943934 | 943935 | 943936 | 943937 | 943938 | 943939 | 943940 | 943941 | 943942 | 943943 | 943944 | 943945 | 943946 | 943947 | 943948 | 943949 | 943950 | 943951 | 943952 | 943953 | 943954 | 943955 | 943956 | 943957 | 943958 | 943959 | 943960 | 943961 | 943962 | 943963 | 943964 | 943965 | 943966 | 943967 | 943968 | 943969 | 943970 | 943971 | 943972 | 943973 | 943974 | 943975 | 943976 | 943977 | 943978 | 943979 | 943980 | 943981 | 943982 | 943983 | 943984 | 943985 | 943986 | 943987 | 943988 | 943989 | 943990 | 943991 | 943992 | 943993 | 943994 | 943995 | 943996 | 943997 | 943998 | 943999 | 944000 | 944001 | 944002 | 944003 | 944004 | 944005 | 944006 | 944007 | 944008 | 944009 | 944010 | 944011 | 944012 | 944013 | 944014 | 944015 | 944016 | 944017 | 944018 | 944019 | 944020 | 944021 | 944022 | 944023 | 944024 | 944025 | 944026 | 944027 | 944028 | 944029 | 944030 | 944031 | 944032 | 944033 | 944034 | 944035 | 944036 | 944037 | 944038 | 944039 | 944040 | 944041 | 944042 | 944043 | 944044 | 944045 | 944046 | 944047 | 944048 | 944049 | 944050 | 944051 | 944052 | 944053 | 944054 | 944055 | 944056 | 944057 | 944058 | 944059 | 944060 | 944061 | 944062 | 944063 | 944064 | 944065 | 944066 | 944067 | 944068 | 944069 | 944070 | 944071 | 944072 | 944073 | 944074 | 944075 | 944076 | 944077 | 944078 | 944079 | 944080 | 944081 | 944082 | 944083 | 944084 | 944085 | 944086 | 944087 | 944088 | 944089 | 944090 | 944091 | 944092 | 944093 | 944094 | 944095 | 944096 | 944097 | 944098 | 944099 | 944100 | 944101 | 944102 | 944103 | 944104 | 944105 | 944106 | 944107 | 944108 | 944109 | 944110 | 944111 | 944112 | 944113 | 944114 | 944115 | 944116 | 944117 | 944118 | 944119 | 944120 | 944121 | 944122 | 944123 | 944124 | 944125 | 944126 | 944127 | 944128 | 944129 | 944130 | 944131 | 944132 | 944133 | 944134 | 944135 | 944136 | 944137 | 944138 | 944139 | 944140 | 944141 | 944142 | 944143 | 944144 | 944145 | 944146 | 944147 | 944148 | 944149 | 944150 | 944151 | 944152 | 944153 | 944154 | 944155 | 944156 | 944157 | 944158 | 944159 | 944160 | 944161 | 944162 | 944163 | 944164 | 944165 | 944166 | 944167 | 944168 | 944169 | 944170 | 944171 | 944172 | 944173 | 944174 | 944175 | 944176 | 944177 | 944178 | 944179 | 944180 | 944181 | 944182 | 944183 | 944184 | 944185 | 944186 | 944187 | 944188 | 944189 | 944190 | 944191 | 944192 | 944193 | 944194 | 944195 | 944196 | 944197 | 944198 | 944199 |
|--------|--------|--------|--------|--------|--------|--------|--------|--------|--------|--------|--------|--------|--------|--------|--------|--------|--------|--------|--------|--------|--------|--------|--------|--------|--------|--------|--------|--------|--------|--------|--------|--------|--------|--------|--------|--------|--------|--------|--------|--------|--------|--------|--------|--------|--------|--------|--------|--------|--------|--------|--------|--------|--------|--------|--------|--------|--------|--------|--------|--------|--------|--------|--------|--------|--------|--------|--------|--------|--------|--------|--------|--------|--------|--------|--------|--------|--------|--------|--------|--------|--------|--------|--------|--------|--------|--------|--------|--------|--------|--------|--------|--------|--------|--------|--------|--------|--------|--------|--------|--------|--------|--------|--------|--------|--------|--------|--------|--------|--------|--------|--------|--------|--------|--------|--------|--------|--------|--------|--------|--------|--------|--------|--------|--------|--------|--------|--------|--------|--------|--------|--------|--------|--------|--------|--------|--------|--------|--------|--------|--------|--------|--------|--------|--------|--------|--------|--------|--------|--------|--------|--------|--------|--------|--------|--------|--------|--------|--------|--------|--------|--------|--------|--------|--------|--------|--------|--------|--------|--------|--------|--------|--------|--------|--------|--------|--------|--------|--------|--------|--------|--------|--------|--------|--------|--------|--------|--------|--------|--------|--------|--------|--------|--------|--------|--------|--------|--------|--------|--------|--------|--------|--------|--------|--------|--------|--------|--------|--------|--------|--------|--------|--------|--------|--------|--------|--------|--------|--------|--------|--------|--------|--------|--------|--------|--------|--------|--------|--------|--------|--------|--------|--------|--------|--------|--------|--------|--------|--------|--------|--------|--------|--------|--------|--------|--------|--------|--------|--------|--------|--------|--------|--------|--------|--------|--------|--------|--------|--------|--------|--------|--------|--------|--------|--------|--------|--------|--------|--------|--------|--------|--------|--------|--------|--------|--------|--------|--------|--------|--------|--------|--------|--------|--------|--------|--------|--------|--------|--------|--------|--------|--------|--------|--------|--------|--------|--------|--------|--------|--------|--------|--------|--------|--------|--------|--------|--------|--------|--------|--------|--------|--------|--------|--------|--------|--------|--------|--------|--------|--------|--------|--------|--------|--------|--------|--------|--------|--------|--------|--------|--------|--------|--------|--------|--------|--------|--------|--------|--------|--------|--------|--------|--------|--------|--------|--------|--------|--------|--------|--------|--------|--------|--------|--------|--------|--------|--------|--------|--------|--------|--------|--------|--------|--------|--------|--------|--------|--------|--------|--------|--------|--------|





|        |        |        |        |        |        |        |        |        |        |        |        |        |        |        |        |        |        |        |        |        |        |        |        |        |        |        |        |        |        |        |        |        |        |        |        |        |        |        |        |        |        |        |        |        |        |        |        |        |        |        |        |        |        |        |        |        |        |        |        |        |        |        |        |        |        |        |        |        |        |        |        |        |        |        |        |        |        |        |        |        |        |        |        |        |        |        |        |        |        |        |        |        |        |        |        |        |        |        |        |        |        |        |        |        |        |        |        |        |        |        |        |        |        |        |        |        |        |        |        |        |        |        |        |        |        |        |        |        |        |        |        |        |        |        |        |        |        |        |        |        |        |        |        |        |        |        |        |        |        |        |        |        |        |        |        |        |        |        |        |        |        |        |        |        |        |        |        |        |        |        |        |        |        |        |        |        |        |        |        |        |        |        |        |        |        |        |        |        |        |        |        |        |        |        |        |        |        |        |        |        |        |        |        |        |        |        |        |        |        |        |        |        |        |        |        |        |        |        |        |        |        |        |        |        |        |        |        |        |        |        |        |        |        |        |        |        |        |        |        |        |        |        |        |        |        |        |        |        |        |        |        |        |        |        |        |        |        |        |        |        |        |        |        |        |        |        |        |        |        |        |        |        |        |        |        |        |        |        |        |        |        |        |        |        |        |        |        |        |        |        |        |        |        |        |        |        |        |        |        |        |        |        |        |        |        |        |        |        |        |        |        |        |        |        |        |        |        |        |        |        |        |        |        |        |        |        |        |        |        |        |        |        |        |        |        |        |        |        |        |        |        |        |        |        |        |        |        |        |        |        |        |        |        |        |        |        |        |        |        |        |        |        |        |        |        |        |        |        |        |        |        |        |        |        |        |        |        |        |        |        |        |        |        |        |        |        |        |        |        |        |        |        |        |        |        |        |        |        |        |        |        |        |        |        |        |        |        |        |  |
|--------|--------|--------|--------|--------|--------|--------|--------|--------|--------|--------|--------|--------|--------|--------|--------|--------|--------|--------|--------|--------|--------|--------|--------|--------|--------|--------|--------|--------|--------|--------|--------|--------|--------|--------|--------|--------|--------|--------|--------|--------|--------|--------|--------|--------|--------|--------|--------|--------|--------|--------|--------|--------|--------|--------|--------|--------|--------|--------|--------|--------|--------|--------|--------|--------|--------|--------|--------|--------|--------|--------|--------|--------|--------|--------|--------|--------|--------|--------|--------|--------|--------|--------|--------|--------|--------|--------|--------|--------|--------|--------|--------|--------|--------|--------|--------|--------|--------|--------|--------|--------|--------|--------|--------|--------|--------|--------|--------|--------|--------|--------|--------|--------|--------|--------|--------|--------|--------|--------|--------|--------|--------|--------|--------|--------|--------|--------|--------|--------|--------|--------|--------|--------|--------|--------|--------|--------|--------|--------|--------|--------|--------|--------|--------|--------|--------|--------|--------|--------|--------|--------|--------|--------|--------|--------|--------|--------|--------|--------|--------|--------|--------|--------|--------|--------|--------|--------|--------|--------|--------|--------|--------|--------|--------|--------|--------|--------|--------|--------|--------|--------|--------|--------|--------|--------|--------|--------|--------|--------|--------|--------|--------|--------|--------|--------|--------|--------|--------|--------|--------|--------|--------|--------|--------|--------|--------|--------|--------|--------|--------|--------|--------|--------|--------|--------|--------|--------|--------|--------|--------|--------|--------|--------|--------|--------|--------|--------|--------|--------|--------|--------|--------|--------|--------|--------|--------|--------|--------|--------|--------|--------|--------|--------|--------|--------|--------|--------|--------|--------|--------|--------|--------|--------|--------|--------|--------|--------|--------|--------|--------|--------|--------|--------|--------|--------|--------|--------|--------|--------|--------|--------|--------|--------|--------|--------|--------|--------|--------|--------|--------|--------|--------|--------|--------|--------|--------|--------|--------|--------|--------|--------|--------|--------|--------|--------|--------|--------|--------|--------|--------|--------|--------|--------|--------|--------|--------|--------|--------|--------|--------|--------|--------|--------|--------|--------|--------|--------|--------|--------|--------|--------|--------|--------|--------|--------|--------|--------|--------|--------|--------|--------|--------|--------|--------|--------|--------|--------|--------|--------|--------|--------|--------|--------|--------|--------|--------|--------|--------|--------|--------|--------|--------|--------|--------|--------|--------|--------|--------|--------|--------|--------|--------|--------|--------|--------|--------|--------|--------|--------|--------|--------|--------|--------|--------|--------|--------|--------|--------|--------|--------|--------|--------|--------|--------|--------|--------|--------|--------|--------|--------|--------|--------|--------|--------|--------|--------|--------|--------|--------|--------|--------|--------|--------|--------|--------|--------|--------|--------|--------|--|
| PC2878 | PC2879 | PC2880 | PC2881 | PC2882 | PC2883 | PC2884 | PC2885 | PC2886 | PC2887 | PC2888 | PC2889 | PC2890 | PC2891 | PC2892 | PC2893 | PC2894 | PC2895 | PC2896 | PC2897 | PC2898 | PC2899 | PC2900 | PC2901 | PC2902 | PC2903 | PC2904 | PC2905 | PC2906 | PC2907 | PC2908 | PC2909 | PC2910 | PC2911 | PC2912 | PC2913 | PC2914 | PC2915 | PC2916 | PC2917 | PC2918 | PC2919 | PC2920 | PC2921 | PC2922 | PC2923 | PC2924 | PC2925 | PC2926 | PC2927 | PC2928 | PC2929 | PC2930 | PC2931 | PC2932 | PC2933 | PC2934 | PC2935 | PC2936 | PC2937 | PC2938 | PC2939 | PC2940 | PC2941 | PC2942 | PC2943 | PC2944 | PC2945 | PC2946 | PC2947 | PC2948 | PC2949 | PC2950 | PC2951 | PC2952 | PC2953 | PC2954 | PC2955 | PC2956 | PC2957 | PC2958 | PC2959 | PC2960 | PC2961 | PC2962 | PC2963 | PC2964 | PC2965 | PC2966 | PC2967 | PC2968 | PC2969 | PC2970 | PC2971 | PC2972 | PC2973 | PC2974 | PC2975 | PC2976 | PC2977 | PC2978 | PC2979 | PC2980 | PC2981 | PC2982 | PC2983 | PC2984 | PC2985 | PC2986 | PC2987 | PC2988 | PC2989 | PC2990 | PC2991 | PC2992 | PC2993 | PC2994 | PC2995 | PC2996 | PC2997 | PC2998 | PC2999 | PC3000 | PC3001 | PC3002 | PC3003 | PC3004 | PC3005 | PC3006 | PC3007 | PC3008 | PC3009 | PC3010 | PC3011 | PC3012 | PC3013 | PC3014 | PC3015 | PC3016 | PC3017 | PC3018 | PC3019 | PC3020 | PC3021 | PC3022 | PC3023 | PC3024 | PC3025 | PC3026 | PC3027 | PC3028 | PC3029 | PC3030 | PC3031 | PC3032 | PC3033 | PC3034 | PC3035 | PC3036 | PC3037 | PC3038 | PC3039 | PC3040 | PC3041 | PC3042 | PC3043 | PC3044 | PC3045 | PC3046 | PC3047 | PC3048 | PC3049 | PC3050 | PC3051 | PC3052 | PC3053 | PC3054 | PC3055 | PC3056 | PC3057 | PC3058 | PC3059 | PC3060 | PC3061 | PC3062 | PC3063 | PC3064 | PC3065 | PC3066 | PC3067 | PC3068 | PC3069 | PC3070 | PC3071 | PC3072 | PC3073 | PC3074 | PC3075 | PC3076 | PC3077 | PC3078 | PC3079 | PC3080 | PC3081 | PC3082 | PC3083 | PC3084 | PC3085 | PC3086 | PC3087 | PC3088 | PC3089 | PC3090 | PC3091 | PC3092 | PC3093 | PC3094 | PC3095 | PC3096 | PC3097 | PC3098 | PC3099 | PC3100 | PC3101 | PC3102 | PC3103 | PC3104 | PC3105 | PC3106 | PC3107 | PC3108 | PC3109 | PC3110 | PC3111 | PC3112 | PC3113 | PC3114 | PC3115 | PC3116 | PC3117 | PC3118 | PC3119 | PC3120 | PC3121 | PC3122 | PC3123 | PC3124 | PC3125 | PC3126 | PC3127 | PC3128 | PC3129 | PC3130 | PC3131 | PC3132 | PC3133 | PC3134 | PC3135 | PC3136 | PC3137 | PC3138 | PC3139 | PC3140 | PC3141 | PC3142 | PC3143 | PC3144 | PC3145 | PC3146 | PC3147 | PC3148 | PC3149 | PC3150 | PC3151 | PC3152 | PC3153 | PC3154 | PC3155 | PC3156 | PC3157 | PC3158 | PC3159 | PC3160 | PC3161 | PC3162 | PC3163 | PC3164 | PC3165 | PC3166 | PC3167 | PC3168 | PC3169 | PC3170 | PC3171 | PC3172 | PC3173 | PC3174 | PC3175 | PC3176 | PC3177 | PC3178 | PC3179 | PC3180 | PC3181 | PC3182 | PC3183 | PC3184 | PC3185 | PC3186 | PC3187 | PC3188 | PC3189 | PC3190 | PC3191 | PC3192 | PC3193 | PC3194 | PC3195 | PC3196 | PC3197 | PC3198 | PC3199 | PC3200 | PC3201 | PC3202 | PC3203 | PC3204 | PC3205 | PC3206 | PC3207 | PC3208 | PC3209 | PC3210 | PC3211 | PC3212 | PC3213 | PC3214 | PC3215 | PC3216 | PC3217 | PC3218 | PC3219 | PC3220 | PC3221 | PC3222 | PC3223 | PC3224 | PC3225 | PC3226 | PC3227 | PC3228 | PC3229 | PC3230 | PC3231 | PC3232 | PC3233 | PC3234 | PC3235 | PC3236 | PC3237 | PC3238 | PC3239 | PC3240 | PC3241 | PC3242 | PC3243 | PC3244 | PC3245 | PC3246 | PC3247 | PC3248 | PC3249 | PC3250 | PC3251 | PC3252 | PC3253 | PC3254 | PC3255 | PC3256 | PC3257 | PC3258 | PC3259 | PC3260 | PC3261 | PC3262 | PC3263 | PC3264 | PC3265 | PC3266 | PC3267 | PC3268 | PC3269 | PC3270 | PC3271 | PC3272 | PC3273 | PC3274 | PC3275 | PC3276 | PC3277 | PC3278 | PC3279 | PC3280 | PC3281 | PC3282 | PC3283 | PC3284 | PC3285 | PC3286 |  |
|--------|--------|--------|--------|--------|--------|--------|--------|--------|--------|--------|--------|--------|--------|--------|--------|--------|--------|--------|--------|--------|--------|--------|--------|--------|--------|--------|--------|--------|--------|--------|--------|--------|--------|--------|--------|--------|--------|--------|--------|--------|--------|--------|--------|--------|--------|--------|--------|--------|--------|--------|--------|--------|--------|--------|--------|--------|--------|--------|--------|--------|--------|--------|--------|--------|--------|--------|--------|--------|--------|--------|--------|--------|--------|--------|--------|--------|--------|--------|--------|--------|--------|--------|--------|--------|--------|--------|--------|--------|--------|--------|--------|--------|--------|--------|--------|--------|--------|--------|--------|--------|--------|--------|--------|--------|--------|--------|--------|--------|--------|--------|--------|--------|--------|--------|--------|--------|--------|--------|--------|--------|--------|--------|--------|--------|--------|--------|--------|--------|--------|--------|--------|--------|--------|--------|--------|--------|--------|--------|--------|--------|--------|--------|--------|--------|--------|--------|--------|--------|--------|--------|--------|--------|--------|--------|--------|--------|--------|--------|--------|--------|--------|--------|--------|--------|--------|--------|--------|--------|--------|--------|--------|--------|--------|--------|--------|--------|--------|--------|--------|--------|--------|--------|--------|--------|--------|--------|--------|--------|--------|--------|--------|--------|--------|--------|--------|--------|--------|--------|--------|--------|--------|--------|--------|--------|--------|--------|--------|--------|--------|--------|--------|--------|--------|--------|--------|--------|--------|--------|--------|--------|--------|--------|--------|--------|--------|--------|--------|--------|--------|--------|--------|--------|--------|--------|--------|--------|--------|--------|--------|--------|--------|--------|--------|--------|--------|--------|--------|--------|--------|--------|--------|--------|--------|--------|--------|--------|--------|--------|--------|--------|--------|--------|--------|--------|--------|--------|--------|--------|--------|--------|--------|--------|--------|--------|--------|--------|--------|--------|--------|--------|--------|--------|--------|--------|--------|--------|--------|--------|--------|--------|--------|--------|--------|--------|--------|--------|--------|--------|--------|--------|--------|--------|--------|--------|--------|--------|--------|--------|--------|--------|--------|--------|--------|--------|--------|--------|--------|--------|--------|--------|--------|--------|--------|--------|--------|--------|--------|--------|--------|--------|--------|--------|--------|--------|--------|--------|--------|--------|--------|--------|--------|--------|--------|--------|--------|--------|--------|--------|--------|--------|--------|--------|--------|--------|--------|--------|--------|--------|--------|--------|--------|--------|--------|--------|--------|--------|--------|--------|--------|--------|--------|--------|--------|--------|--------|--------|--------|--------|--------|--------|--------|--------|--------|--------|--------|--------|--------|--------|--------|--------|--------|--------|--------|--------|--------|--------|--------|--------|--------|--------|--------|--------|--------|--------|--------|--------|--------|--------|--|

|        |         |                                                                   |         |       |        |    |           |            |            |           |            |            |            |            |           |       |       |
|--------|---------|-------------------------------------------------------------------|---------|-------|--------|----|-----------|------------|------------|-----------|------------|------------|------------|------------|-----------|-------|-------|
| P70671 | lrf3    | Interferon regulatory factor 3 (Mus musculus)                     | 40.63   | 5.73  | 46832  | 1  | 172757.28 | 0          | 120136.45  | 0         | 483193.5   | 0          | 15834.25   | 0          | 661966.6  | 0.633 |       |
| P70677 | Cgrip1  | Caveolin 3 (Mus musculus)                                         | 20.11   | 23.27 | 31475  | 1  | 73957.67  | 0          | 727901.33  | 0         | 483193.5   | 0          | 76957.45   | 0          | 629471.4  | 0.925 |       |
| P70697 | Ucp1    | Uncoupling protein 1 (Mus musculus)                               | 125.75  | 7.9   | 40692  | 2  | 144689.7  | 2721500.25 | 233886.5   | 2484030   | 1377301.25 | 149072.25  | 2601473.25 | 2604681.7  | 2293260   | 0.925 |       |
| P70698 | Cgrip1  | CTP synthase 1 (Mus musculus)                                     | 396.86  | 16.21 | 66628  | 6  | 84532078  | 6238062    | 7763257    | 7634030   | 9410839    | 7863897    | 9971725    | 9063334    | 8898952   | 1.189 |       |
| P70699 | Gata1   | Lysosomal alpha-glucosidase (Mus musculus)                        | 87.27   | 21.09 | 100648 | 15 | 13090921  | 8435078    | 1547715    | 1335962   | 11675503   | 14847395   | 11739850   | 1199496    | 1189595   | 0.9   |       |
| P70704 | Atg16l1 | Phosphatidyl-transfering ATPase 1A (Mus musculus)                 | 200.12  | 0.69  | 131413 | 1  | 8907087   | 3788856.5  | 2904047    | 54757527  | 2432238    | 3021963.25 | 1812270    | 2921013.25 | 270       | 0.488 |       |
| P70713 | Cgaf7   | T-complex protein 1 subunit beta (Mus musculus)                   | 42.92   | 65.2  | 59652  | 35 | 213906304 | 2128684330 | 15767619.5 | 16833812  | 207638032  | 18026616   | 18026616   | 164369136  | 18026616  | 0.946 |       |
| P80314 | Cgaf7   | T-complex protein 1 subunit delta (Mus musculus)                  | 2533.16 | 71.96 | 57477  | 12 | 127843808 | 136071932  | 14366176   | 144381872 | 158076128  | 153537548  | 149504816  | 2          | 1.118     |       |       |
| P80315 | Cgaf7   | T-complex protein 1 subunit beta (Mus musculus)                   | 2360.89 | 72.17 | 58066  | 35 | 266938688 | 26247762   | 241511680  | 226580816 | 246549744  | 236090494  | 24238176   | 148619960  | 10        | 0.975 |       |
| P80316 | Cgaf7   | T-complex protein 1 subunit epsilon (Mus musculus)                | 1483.34 | 61.18 | 59624  | 24 | 133065024 | 140174936  | 144035004  | 136894312 | 128868024  | 133020060  | 131308096  | 123407376  | 6         | 0.947 |       |
| P80317 | Cgaf7   | T-complex protein 1 subunit gamma (Mus musculus)                  | 1073.41 | 41.43 | 58004  | 17 | 134010896 | 144013656  | 139923004  | 136894312 | 128868024  | 123301024  | 122545600  | 129278016  | 7         | 1.130 |       |
| P80318 | Cgaf7   | T-complex protein 1 subunit gamma (Mus musculus)                  | 528.86  | 55.6  | 46050  | 33 | 217010480 | 188333036  | 215729234  | 162401952 | 189723036  | 208389264  | 229114068  | 218148064  | 240878800 | 16    | 1.564 |
| P80349 | Plckl1  | 5-AAP-activated protein kinase subunit beta-1 (Rattus norvegicus) | 150.30  | 38.46 | 4480   | 1  | 0         | 30823.67   | 0          | 33083.9   | 0          | 331072.69  | 0          | 226144.5   | 0         | 0.639 |       |
| P80366 | Nck2    | 5-AAP-activated protein kinase subunit beta-1 (Rattus norvegicus) | 40.25   | 2.93  | 30394  | 1  | 458043.28 | 306369.22  | 102523.62  | 102523.62 | 33083.9    | 331072.69  | 331072.69  | 331072.69  | 331072.69 | 12    | 0.828 |
| P80377 | Nck2    | 5-AAP-activated protein kinase subunit beta-1 (Rattus norvegicus) | 20.25   | 5.54  | 30394  | 1  | 106271.74 | 306369.22  | 102523.62  | 102523.62 | 33083.9    | 331072.69  | 331072.69  | 331072.69  | 331072.69 | 12    | 0.828 |
| P80378 | Nck2    | 5-AAP-activated protein kinase subunit beta-1 (Rattus norvegicus) | 20.25   | 5.54  | 30394  | 1  | 106271.74 | 306369.22  | 102523.62  | 102523.62 | 33083.9    | 331072.69  | 331072.69  | 331072.69  | 331072.69 | 12    | 0.828 |
| P80379 | Nck2    | 5-AAP-activated protein kinase subunit beta-1 (Rattus norvegicus) | 20.25   | 5.54  | 30394  | 1  | 106271.74 | 306369.22  | 102523.62  | 102523.62 | 33083.9    | 331072.69  | 331072.69  | 331072.69  | 331072.69 | 12    | 0.828 |
| P80380 | Nck2    | 5-AAP-activated protein kinase subunit beta-1 (Rattus norvegicus) | 20.25   | 5.54  | 30394  | 1  | 106271.74 | 306369.22  | 102523.62  | 102523.62 | 33083.9    | 331072.69  | 331072.69  | 331072.69  | 331072.69 | 12    | 0.828 |
| P80381 | Nck2    | 5-AAP-activated protein kinase subunit beta-1 (Rattus norvegicus) | 20.25   | 5.54  | 30394  | 1  | 106271.74 | 306369.22  | 102523.62  | 102523.62 | 33083.9    | 331072.69  | 331072.69  | 331072.69  | 331072.69 | 12    | 0.828 |
| P80382 | Nck2    | 5-AAP-activated protein kinase subunit beta-1 (Rattus norvegicus) | 20.25   | 5.54  | 30394  | 1  | 106271.74 | 306369.22  | 102523.62  | 102523.62 | 33083.9    | 331072.69  | 331072.69  | 331072.69  | 331072.69 | 12    | 0.828 |
| P80383 | Nck2    | 5-AAP-activated protein kinase subunit beta-1 (Rattus norvegicus) | 20.25   | 5.54  | 30394  | 1  | 106271.74 | 306369.22  | 102523.62  | 102523.62 | 33083.9    | 331072.69  | 331072.69  | 331072.69  | 331072.69 | 12    | 0.828 |
| P80384 | Nck2    | 5-AAP-activated protein kinase subunit beta-1 (Rattus norvegicus) | 20.25   | 5.54  | 30394  | 1  | 106271.74 | 306369.22  | 102523.62  | 102523.62 | 33083.9    | 331072.69  | 331072.69  | 331072.69  | 331072.69 | 12    | 0.828 |
| P80385 | Nck2    | 5-AAP-activated protein kinase subunit beta-1 (Rattus norvegicus) | 20.25   | 5.54  | 30394  | 1  | 106271.74 | 306369.22  | 102523.62  | 102523.62 | 33083.9    | 331072.69  | 331072.69  | 331072.69  | 331072.69 | 12    | 0.828 |
| P80386 | Nck2    | 5-AAP-activated protein kinase subunit beta-1 (Rattus norvegicus) | 20.25   | 5.54  | 30394  | 1  | 106271.74 | 306369.22  | 102523.62  | 102523.62 | 33083.9    | 331072.69  | 331072.69  | 331072.69  | 331072.69 | 12    | 0.828 |
| P80387 | Nck2    | 5-AAP-activated protein kinase subunit beta-1 (Rattus norvegicus) | 20.25   | 5.54  | 30394  | 1  | 106271.74 | 306369.22  | 102523.62  | 102523.62 | 33083.9    | 331072.69  | 331072.69  | 331072.69  | 331072.69 | 12    | 0.828 |
| P80388 | Nck2    | 5-AAP-activated protein kinase subunit beta-1 (Rattus norvegicus) | 20.25   | 5.54  | 30394  | 1  | 106271.74 | 306369.22  | 102523.62  | 102523.62 | 33083.9    | 331072.69  | 331072.69  | 331072.69  | 331072.69 | 12    | 0.828 |
| P80389 | Nck2    | 5-AAP-activated protein kinase subunit beta-1 (Rattus norvegicus) | 20.25   | 5.54  | 30394  | 1  | 106271.74 | 306369.22  | 102523.62  | 102523.62 | 33083.9    | 331072.69  | 331072.69  | 331072.69  | 331072.69 | 12    | 0.828 |
| P80390 | Nck2    | 5-AAP-activated protein kinase subunit beta-1 (Rattus norvegicus) | 20.25   | 5.54  | 30394  | 1  | 106271.74 | 306369.22  | 102523.62  | 102523.62 | 33083.9    | 331072.69  | 331072.69  | 331072.69  | 331072.69 | 12    | 0.828 |
| P80391 | Nck2    | 5-AAP-activated protein kinase subunit beta-1 (Rattus norvegicus) | 20.25   | 5.54  | 30394  | 1  | 106271.74 | 306369.22  | 102523.62  | 102523.62 | 33083.9    | 331072.69  | 331072.69  | 331072.69  | 331072.69 | 12    | 0.828 |
| P80392 | Nck2    | 5-AAP-activated protein kinase subunit beta-1 (Rattus norvegicus) | 20.25   | 5.54  | 30394  | 1  | 106271.74 | 306369.22  | 102523.62  | 102523.62 | 33083.9    | 331072.69  | 331072.69  | 331072.69  | 331072.69 | 12    | 0.828 |
| P80393 | Nck2    | 5-AAP-activated protein kinase subunit beta-1 (Rattus norvegicus) | 20.25   | 5.54  | 30394  | 1  | 106271.74 | 306369.22  | 102523.62  | 102523.62 | 33083.9    | 331072.69  | 331072.69  | 331072.69  | 331072.69 | 12    | 0.828 |
| P80394 | Nck2    | 5-AAP-activated protein kinase subunit beta-1 (Rattus norvegicus) | 20.25   | 5.54  | 30394  | 1  | 106271.74 | 306369.22  | 102523.62  | 102523.62 | 33083.9    | 331072.69  | 331072.69  | 331072.69  | 331072.69 | 12    | 0.828 |
| P80395 | Nck2    | 5-AAP-activated protein kinase subunit beta-1 (Rattus norvegicus) | 20.25   | 5.54  | 30394  | 1  | 106271.74 | 306369.22  | 102523.62  | 102523.62 | 33083.9    | 331072.69  | 331072.69  | 331072.69  | 331072.69 | 12    | 0.828 |
| P80396 | Nck2    | 5-AAP-activated protein kinase subunit beta-1 (Rattus norvegicus) | 20.25   | 5.54  | 30394  | 1  | 106271.74 | 306369.22  | 102523.62  | 102523.62 | 33083.9    | 331072.69  | 331072.69  | 331072.69  | 331072.69 | 12    | 0.828 |
| P80397 | Nck2    | 5-AAP-activated protein kinase subunit beta-1 (Rattus norvegicus) | 20.25   | 5.54  | 30394  | 1  | 106271.74 | 306369.22  | 102523.62  | 102523.62 | 33083.9    | 331072.69  | 331072.69  | 331072.69  | 331072.69 | 12    | 0.828 |
| P80398 | Nck2    | 5-AAP-activated protein kinase subunit beta-1 (Rattus norvegicus) | 20.25   | 5.54  | 30394  | 1  | 106271.74 | 306369.22  | 102523.62  | 102523.62 | 33083.9    | 331072.69  | 331072.69  | 331072.69  | 331072.69 | 12    | 0.828 |
| P80399 | Nck2    | 5-AAP-activated protein kinase subunit beta-1 (Rattus norvegicus) | 20.25   | 5.54  | 30394  | 1  | 106271.74 | 306369.22  | 102523.62  | 102523.62 | 33083.9    | 331072.69  | 331072.69  | 331072.69  | 331072.69 | 12    | 0.828 |
| P80400 | Nck2    | 5-AAP-activated protein kinase subunit beta-1 (Rattus norvegicus) | 20.25   | 5.54  | 30394  | 1  | 106271.74 | 306369.22  | 102523.62  | 102523.62 | 33083.9    | 331072.69  | 331072.69  | 331072.69  | 331072.69 | 12    | 0.828 |
| P80401 | Nck2    | 5-AAP-activated protein kinase subunit beta-1 (Rattus norvegicus) | 20.25   | 5.54  | 30394  | 1  | 106271.74 | 306369.22  | 102523.62  | 102523.62 | 33083.9    | 331072.69  | 331072.69  | 331072.69  | 331072.69 | 12    | 0.828 |
| P80402 | Nck2    | 5-AAP-activated protein kinase subunit beta-1 (Rattus norvegicus) | 20.25   | 5.54  | 30394  | 1  | 106271.74 | 306369.22  | 102523.62  | 102523.62 | 33083.9    | 331072.69  | 331072.69  | 331072.69  | 331072.69 | 12    | 0.828 |
| P80403 | Nck2    | 5-AAP-activated protein kinase subunit beta-1 (Rattus norvegicus) | 20.25   | 5.54  | 30394  | 1  | 106271.74 | 306369.22  | 102523.62  | 102523.62 | 33083.9    | 331072.69  | 331072.69  | 331072.69  | 331072.69 | 12    | 0.828 |
| P80404 | Nck2    | 5-AAP-activated protein kinase subunit beta-1 (Rattus norvegicus) | 20.25   | 5.54  | 30394  | 1  | 106271.74 | 306369.22  | 102523.62  | 102523.62 | 33083.9    | 331072.69  | 331072.69  | 331072.69  | 331072.69 | 12    | 0.828 |
| P80405 | Nck2    | 5-AAP-activated protein kinase subunit beta-1 (Rattus norvegicus) | 20.25   | 5.54  | 30394  | 1  | 106271.74 | 306369.22  | 102523.62  | 102523.62 | 33083.9    | 331072.69  | 331072.69  | 331072.69  | 331072.69 | 12    | 0.828 |
| P80406 | Nck2    | 5-AAP-activated protein kinase subunit beta-1 (Rattus norvegicus) | 20.25   | 5.54  | 30394  | 1  | 106271.74 | 306369.22  | 102523.62  | 102523.62 | 33083.9    | 331072.69  | 331072.69  | 331072.69  | 331072.69 | 12    | 0.828 |
| P80407 | Nck2    | 5-AAP-activated protein kinase subunit beta-1 (Rattus norvegicus) | 20.25   | 5.54  | 30394  | 1  | 106271.74 | 306369.22  | 102523.62  | 102523.62 | 33083.9    | 331072.69  | 331072.69  | 331072.69  | 331072.69 | 12    | 0.828 |
| P80408 | Nck2    | 5-AAP-activated protein kinase subunit beta-1 (Rattus norvegicus) | 20.25   | 5.54  | 30394  | 1  | 106271.74 | 306369.22  | 102523.62  | 102523.62 | 33083.9    | 331072.69  | 331072.69  | 331072.69  | 331072.69 | 12    | 0.828 |
| P80409 | Nck2    | 5-AAP-activated protein kinase subunit beta-1 (Rattus norvegicus) | 20.25   | 5.54  | 30394  | 1  | 106271.74 | 306369.22  | 102523.62  | 102523.62 | 33083.9    | 331072.69  | 331072.69  | 331072.69  | 331072.69 | 12    | 0.828 |
| P80410 | Nck2    | 5-AAP-activated protein kinase subunit beta-1 (Rattus norvegicus) | 20.25   | 5.54  | 30394  | 1  | 106271.74 | 306369.22  | 102523.62  | 102523.62 | 33083.9    | 331072.69  | 331072.69  | 331072.69  | 331072.69 | 12    | 0.828 |
| P80411 | Nck2    | 5-AAP-activated protein kinase subunit beta-1 (Rattus norvegicus) | 20.25   | 5.54  | 30394  | 1  | 106271.74 | 306369.22  | 102523.62  | 102523.62 | 33083.9    | 331072.69  | 331072.69  | 331072.69  | 331072.69 | 12    | 0.828 |
| P80412 | Nck2    | 5-AAP-activated protein kinase subunit beta-1 (Rattus norvegicus) | 20.25   | 5.54  | 30394  | 1  | 106271.74 | 306369.22  | 102523.62  | 102523.62 | 33083.9    | 331072.69  | 331072.69  | 331072.69  | 331072.69 | 12    | 0.828 |
| P80413 | Nck2    | 5-AAP-activated protein kinase subunit beta-1 (Rattus norvegicus) | 20.25   | 5.54  | 30394  | 1  | 106271.74 | 306369.22  | 102523.62  | 102523.62 | 33083.9    | 331072.69  | 331072.69  | 331072.69  | 331072.69 | 12    | 0.828 |
| P80414 | Nck2    | 5-AAP-activated protein kinase subunit beta-1 (Rattus norvegicus) | 20.25   | 5.54  | 30394  | 1  | 106271.74 | 306369.22  | 102523.62  | 102523.62 | 33083.9    | 331072.69  | 331072.69  | 331072.69  | 331072.69 | 12    | 0.828 |
| P80415 | Nck2    | 5-AAP-activated protein kinase subunit beta-1 (Rattus norvegicus) | 20.25   | 5.54  | 30394  | 1  | 106271.74 | 306369.22  | 102523.62  | 102523.62 | 33083.9    | 331072.69  | 331072.69  | 331072.69  | 331072.69 | 12    | 0.828 |
| P80416 | Nck2    | 5-AAP-activated protein kinase subunit beta-1 (Rattus norvegicus) | 20.25   | 5.54  | 30394  | 1  | 106271.74 | 306369.22  | 102523.62  | 102523.62 | 33083.9    | 331072.69  | 331072.69  | 331072.69  | 331072.69 | 12    | 0.828 |
| P80417 | Nck2    | 5-AAP-activated protein kinase subunit beta-1 (Rattus norvegicus) | 20.25   | 5.54  | 30394  | 1  | 106271.74 | 306369.22  | 102523.62  | 102523.62 | 33083.9    | 331072.69  | 331072.69  | 331072.69  | 331072.69 | 12    | 0.828 |
| P80418 | Nck2    | 5-AAP-activated protein kinase subunit beta-1 (Rattus norvegicus) | 20.25   | 5.54  | 30394  | 1  | 106271.74 | 306369.22  | 102523.62  | 102523.62 | 33083.9    | 331072.69  | 331072.69  | 331072.69  | 331072.69 | 12    | 0.828 |
| P80419 | Nck2    | 5-AAP-activated protein kinase subunit beta-1 (Rattus norvegicus) | 20.25   | 5.54  | 30394  | 1  | 106271.74 | 306369.22  | 102523.62  | 102523.62 | 33083.9    | 331072.69  | 331072.69  | 331072.69  | 331072.69 | 12    | 0.828 |
| P80420 | Nck2    |                                                                   |         |       |        |    |           |            |            |           |            |            |            |            |           |       |       |



|        |        |                                                                               |         |       |        |            |           |           |           |           |            |           |            |       |
|--------|--------|-------------------------------------------------------------------------------|---------|-------|--------|------------|-----------|-----------|-----------|-----------|------------|-----------|------------|-------|
| Q0T114 | Plat-2 | 2,5-phosphatidylserine 12 (Mus musculus)                                      | 215.83  | 9.7   | 67514  | 476882     | 275506    | 338393    | 300330.5  | 328755.25 | 300643.5   | 357920.5  | 374901.75  | 0.952 |
| Q0T115 | Zc3h3  | Zinc finger CCH domain-containing protein 15 (Mus musculus)                   | 227.12  | 11.27 | 48327  | 405776.5   | 2634444   | 338702.9  | 100480.48 | 364204.5  | 312772.5   | 326091.5  | 370901.5   | 1.101 |
| Q0T119 | Ubp3p  | U416.6 (U5-tri-mRNP-associated protein 2 (Mus musculus))                      | 590.19  | 28.72 | 65166  | 1252832    | 765182    | 888864    | 8002273   | 7212941   | 953542     | 1208765   | 952307     | 1.200 |
| Q0T124 | Smad4  | Transcription activator BRG1 (Mus musculus)                                   | 146.65  | 2.23  | 181427 | 46552244   | 36690434  | 4810504   | 6323904   | 7221962   | 32219892   | 4456711   | 1034157    | 0.619 |
| Q0T126 | CwC27  | Spliceosome-associated protein CWC27 homolog (Mus musculus)                   | 59.6    | 3.2   | 53543  | 510271.28  | 265432.84 | 49686206  | 598727.88 | 375664.5  | 575664.5   | 353406.33 | 0          | 0.473 |
| Q0T144 | Nix1   | NLR family member XI (Mus musculus)                                           | 38.88   | 1.03  | 107831 | 0          | 0         | 0         | 33831.25  | 0         | 455411.34  | 353406.33 | 0          | 0.770 |
| Q0T144 | Prk2c  | Protein RPRC2 (Mus musculus)                                                  | 366.48  | 3.51  | 310892 | 9532738    | 5888545   | 7677910   | 53465696  | 8492806   | 6114395.5  | 6080800   | 8017864    | 1.016 |
| Q0T144 | Secm3  | Secom3 (Mus musculus)                                                         | 49.87   | 2.63  | 47661  | 180965.88  | 196457.5  | 480410.84 | 196457.5  | 2109674.5 | 2005462.88 | 338299.19 | 297227.5   | 1.821 |
| Q0T144 | Exoc5  | Exocyst complex component 5 (Mus musculus)                                    | 88.5    | 2.97  | 81738  | 90419.75   | 2284833.5 | 22252322  | 923180.5  | 1520775   | 22252322   | 351525.09 | 297227.5   | 1.2   |
| Q0T148 | Hk3    | Hesokine3 (Mus musculus)                                                      | 1956.47 | 45.88 | 100101 | 57741466   | 624937304 | 57073704  | 57095980  | 48004472  | 65858992   | 60951266  | 5639324    | 1.089 |
| Q0T148 | Prp1   | Pre-B cell leukemia transcription factor-interacting protein 1 (Mus musculus) | 200.4   | 6.74  | 81164  | 25737904   | 2776942   | 2130301   | 26906256  | 806240.5  | 18757480   | 1901761   | 2441537.25 | 0.878 |
| Q0T148 | Prp1   | Pre-B cell leukemia transcription factor-interacting protein 1 (Mus musculus) | 629.99  | 25.84 | 76504  | 17373806   | 195017700 | 27026638  | 77953416  | 23068986  | 23068986   | 25252712  | 22728738   | 1.154 |
| Q0T150 | Trp1   | RNA (guanine(25)-N(2)-dimethyltransferase (Mus musculus))                     | 90.14   | 4.52  | 10510  | 2737876    | 752073138 | 35703608  | 5870346   | 17953416  | 20446480   | 100532.69 | 834804     | 1.440 |
| Q0T152 | Prp1   | 25S proteosome non-ATPase regulatory subunit 1 (Mus musculus)                 | 1552.84 | 34.63 | 105780 | 60239368   | 60084744  | 6124520   | 65827872  | 38623472  | 70017416   | 66479388  | 6549064    | 1.109 |
| Q0T152 | Cybe3  | Cytochrome P-450 (Cybe3) (Mus musculus)                                       | 122.29  | 1.63  | 20741  | 1860910.88 | 336541.75 | 66996180  | 26273325  | 36456044  | 32806134   | 463038    | 3820732    | 1.487 |
| Q0T152 | Prp1   | 25S proteosome non-ATPase regulatory subunit 1 (Mus musculus)                 | 1552.84 | 34.63 | 105780 | 60239368   | 60084744  | 6124520   | 65827872  | 38623472  | 70017416   | 66479388  | 6549064    | 1.109 |
| Q0T152 | Cybe3  | Cytochrome P-450 (Cybe3) (Mus musculus)                                       | 122.29  | 1.63  | 20741  | 1860910.88 | 336541.75 | 66996180  | 26273325  | 36456044  | 32806134   | 463038    | 3820732    | 1.487 |
| Q0T152 | Prp1   | 25S proteosome non-ATPase regulatory subunit 1 (Mus musculus)                 | 1552.84 | 34.63 | 105780 | 60239368   | 60084744  | 6124520   | 65827872  | 38623472  | 70017416   | 66479388  | 6549064    | 1.109 |
| Q0T152 | Cybe3  | Cytochrome P-450 (Cybe3) (Mus musculus)                                       | 122.29  | 1.63  | 20741  | 1860910.88 | 336541.75 | 66996180  | 26273325  | 36456044  | 32806134   | 463038    | 3820732    | 1.487 |
| Q0T152 | Prp1   | 25S proteosome non-ATPase regulatory subunit 1 (Mus musculus)                 | 1552.84 | 34.63 | 105780 | 60239368   | 60084744  | 6124520   | 65827872  | 38623472  | 70017416   | 66479388  | 6549064    | 1.109 |
| Q0T152 | Cybe3  | Cytochrome P-450 (Cybe3) (Mus musculus)                                       | 122.29  | 1.63  | 20741  | 1860910.88 | 336541.75 | 66996180  | 26273325  | 36456044  | 32806134   | 463038    | 3820732    | 1.487 |
| Q0T152 | Prp1   | 25S proteosome non-ATPase regulatory subunit 1 (Mus musculus)                 | 1552.84 | 34.63 | 105780 | 60239368   | 60084744  | 6124520   | 65827872  | 38623472  | 70017416   | 66479388  | 6549064    | 1.109 |
| Q0T152 | Cybe3  | Cytochrome P-450 (Cybe3) (Mus musculus)                                       | 122.29  | 1.63  | 20741  | 1860910.88 | 336541.75 | 66996180  | 26273325  | 36456044  | 32806134   | 463038    | 3820732    | 1.487 |
| Q0T152 | Prp1   | 25S proteosome non-ATPase regulatory subunit 1 (Mus musculus)                 | 1552.84 | 34.63 | 105780 | 60239368   | 60084744  | 6124520   | 65827872  | 38623472  | 70017416   | 66479388  | 6549064    | 1.109 |
| Q0T152 | Cybe3  | Cytochrome P-450 (Cybe3) (Mus musculus)                                       | 122.29  | 1.63  | 20741  | 1860910.88 | 336541.75 | 66996180  | 26273325  | 36456044  | 32806134   | 463038    | 3820732    | 1.487 |
| Q0T152 | Prp1   | 25S proteosome non-ATPase regulatory subunit 1 (Mus musculus)                 | 1552.84 | 34.63 | 105780 | 60239368   | 60084744  | 6124520   | 65827872  | 38623472  | 70017416   | 66479388  | 6549064    | 1.109 |
| Q0T152 | Cybe3  | Cytochrome P-450 (Cybe3) (Mus musculus)                                       | 122.29  | 1.63  | 20741  | 1860910.88 | 336541.75 | 66996180  | 26273325  | 36456044  | 32806134   | 463038    | 3820732    | 1.487 |
| Q0T152 | Prp1   | 25S proteosome non-ATPase regulatory subunit 1 (Mus musculus)                 | 1552.84 | 34.63 | 105780 | 60239368   | 60084744  | 6124520   | 65827872  | 38623472  | 70017416   | 66479388  | 6549064    | 1.109 |
| Q0T152 | Cybe3  | Cytochrome P-450 (Cybe3) (Mus musculus)                                       | 122.29  | 1.63  | 20741  | 1860910.88 | 336541.75 | 66996180  | 26273325  | 36456044  | 32806134   | 463038    | 3820732    | 1.487 |
| Q0T152 | Prp1   | 25S proteosome non-ATPase regulatory subunit 1 (Mus musculus)                 | 1552.84 | 34.63 | 105780 | 60239368   | 60084744  | 6124520   | 65827872  | 38623472  | 70017416   | 66479388  | 6549064    | 1.109 |
| Q0T152 | Cybe3  | Cytochrome P-450 (Cybe3) (Mus musculus)                                       | 122.29  | 1.63  | 20741  | 1860910.88 | 336541.75 | 66996180  | 26273325  | 36456044  | 32806134   | 463038    | 3820732    | 1.487 |
| Q0T152 | Prp1   | 25S proteosome non-ATPase regulatory subunit 1 (Mus musculus)                 | 1552.84 | 34.63 | 105780 | 60239368   | 60084744  | 6124520   | 65827872  | 38623472  | 70017416   | 66479388  | 6549064    | 1.109 |
| Q0T152 | Cybe3  | Cytochrome P-450 (Cybe3) (Mus musculus)                                       | 122.29  | 1.63  | 20741  | 1860910.88 | 336541.75 | 66996180  | 26273325  | 36456044  | 32806134   | 463038    | 3820732    | 1.487 |
| Q0T152 | Prp1   | 25S proteosome non-ATPase regulatory subunit 1 (Mus musculus)                 | 1552.84 | 34.63 | 105780 | 60239368   | 60084744  | 6124520   | 65827872  | 38623472  | 70017416   | 66479388  | 6549064    | 1.109 |
| Q0T152 | Cybe3  | Cytochrome P-450 (Cybe3) (Mus musculus)                                       | 122.29  | 1.63  | 20741  | 1860910.88 | 336541.75 | 66996180  | 26273325  | 36456044  | 32806134   | 463038    | 3820732    | 1.487 |
| Q0T152 | Prp1   | 25S proteosome non-ATPase regulatory subunit 1 (Mus musculus)                 | 1552.84 | 34.63 | 105780 | 60239368   | 60084744  | 6124520   | 65827872  | 38623472  | 70017416   | 66479388  | 6549064    | 1.109 |
| Q0T152 | Cybe3  | Cytochrome P-450 (Cybe3) (Mus musculus)                                       | 122.29  | 1.63  | 20741  | 1860910.88 | 336541.75 | 66996180  | 26273325  | 36456044  | 32806134   | 463038    | 3820732    | 1.487 |
| Q0T152 | Prp1   | 25S proteosome non-ATPase regulatory subunit 1 (Mus musculus)                 | 1552.84 | 34.63 | 105780 | 60239368   | 60084744  | 6124520   | 65827872  | 38623472  | 70017416   | 66479388  | 6549064    | 1.109 |
| Q0T152 | Cybe3  | Cytochrome P-450 (Cybe3) (Mus musculus)                                       | 122.29  | 1.63  | 20741  | 1860910.88 | 336541.75 | 66996180  | 26273325  | 36456044  | 32806134   | 463038    | 3820732    | 1.487 |
| Q0T152 | Prp1   | 25S proteosome non-ATPase regulatory subunit 1 (Mus musculus)                 | 1552.84 | 34.63 | 105780 | 60239368   | 60084744  | 6124520   | 65827872  | 38623472  | 70017416   | 66479388  | 6549064    | 1.109 |
| Q0T152 | Cybe3  | Cytochrome P-450 (Cybe3) (Mus musculus)                                       | 122.29  | 1.63  | 20741  | 1860910.88 | 336541.75 | 66996180  | 26273325  | 36456044  | 32806134   | 463038    | 3820732    | 1.487 |
| Q0T152 | Prp1   | 25S proteosome non-ATPase regulatory subunit 1 (Mus musculus)                 | 1552.84 | 34.63 | 105780 | 60239368   | 60084744  | 6124520   | 65827872  | 38623472  | 70017416   | 66479388  | 6549064    | 1.109 |
| Q0T152 | Cybe3  | Cytochrome P-450 (Cybe3) (Mus musculus)                                       | 122.29  | 1.63  | 20741  | 1860910.88 | 336541.75 | 66996180  | 26273325  | 36456044  | 32806134   | 463038    | 3820732    | 1.487 |
| Q0T152 | Prp1   | 25S proteosome non-ATPase regulatory subunit 1 (Mus musculus)                 | 1552.84 | 34.63 | 105780 | 60239368   | 60084744  | 6124520   | 65827872  | 38623472  | 70017416   | 66479388  | 6549064    | 1.109 |
| Q0T152 | Cybe3  | Cytochrome P-450 (Cybe3) (Mus musculus)                                       | 122.29  | 1.63  | 20741  | 1860910.88 | 336541.75 | 66996180  | 26273325  | 36456044  | 32806134   | 463038    | 3820732    | 1.487 |
| Q0T152 | Prp1   | 25S proteosome non-ATPase regulatory subunit 1 (Mus musculus)                 | 1552.84 | 34.63 | 105780 | 60239368   | 60084744  | 6124520   | 65827872  | 38623472  | 70017416   | 66479388  | 6549064    | 1.109 |
| Q0T152 | Cybe3  | Cytochrome P-450 (Cybe3) (Mus musculus)                                       | 122.29  | 1.63  | 20741  | 1860910.88 | 336541.75 | 66996180  | 26273325  | 36456044  | 32806134   | 463038    | 3820732    | 1.487 |
| Q0T152 | Prp1   | 25S proteosome non-ATPase regulatory subunit 1 (Mus musculus)                 | 1552.84 | 34.63 | 105780 | 60239368   | 60084744  | 6124520   | 65827872  | 38623472  | 70017416   | 66479388  | 6549064    | 1.109 |
| Q0T152 | Cybe3  | Cytochrome P-450 (Cybe3) (Mus musculus)                                       | 122.29  | 1.63  | 20741  | 1860910.88 | 336541.75 | 66996180  | 26273325  | 36456044  | 32806134   | 463038    | 3820732    | 1.487 |
| Q0T152 | Prp1   | 25S proteosome non-ATPase regulatory subunit 1 (Mus musculus)                 | 1552.84 | 34.63 | 105780 | 60239368   | 60084744  | 6124520   | 65827872  | 38623472  | 70017416   | 66479388  | 6549064    | 1.109 |
| Q0T152 | Cybe3  | Cytochrome P-450 (Cybe3) (Mus musculus)                                       | 122.29  | 1.63  | 20741  | 1860910.88 | 336541.75 | 66996180  | 26273325  | 36456044  | 32806134   | 463038    | 3820732    | 1.487 |
| Q0T152 | Prp1   | 25S proteosome non-ATPase regulatory subunit 1 (Mus musculus)                 | 1552.84 | 34.63 | 105780 | 60239368   | 60084744  | 6124520   | 65827872  | 38623472  | 70017416   | 66479388  | 6549064    | 1.109 |
| Q0T152 | Cybe3  | Cytochrome P-450 (Cybe3) (Mus musculus)                                       | 122.29  | 1.63  | 20741  | 1860910.88 | 336541.75 | 66996180  | 26273325  | 36456044  | 32806134   | 463038    | 3820732    | 1.487 |
| Q0T152 | Prp1   | 25S proteosome non-ATPase regulatory subunit 1 (Mus musculus)                 | 1552.84 | 34.63 | 105780 | 60239368   | 60084744  | 6124520   | 65827872  | 38623472  | 70017416   | 66479388  | 6549064    | 1.109 |
| Q0T152 | Cybe3  | Cytochrome P-450 (Cybe3) (Mus musculus)                                       | 122.29  | 1.63  | 20741  | 1860910.88 | 336541.75 | 66996180  | 26273325  | 36456044  | 32806134   | 463038    | 3820732    | 1.487 |
| Q0T152 | Prp1   | 25S proteosome non-ATPase regulatory subunit 1 (Mus musculus)                 | 1552.84 | 34.63 | 105780 | 60239368   | 60084744  | 6124520   | 65827872  | 38623472  | 70017416   | 66479388  | 6549064    | 1.109 |
| Q0T152 | Cybe3  | Cytochrome P-450 (Cybe3) (Mus musculus)                                       | 122.29  | 1.63  | 20741  | 1860910.88 | 336541.75 | 66996180  | 26273325  | 36456044  | 32806134   | 463038    | 3820732    | 1.487 |
| Q0T152 | Prp1   | 25S proteosome non-ATPase regulatory subunit 1 (Mus musculus)                 | 1552.84 | 34.63 | 105780 | 60239368   | 60084744  | 6124520   | 65827872  | 38623472  | 70017416   | 66479388  | 6549064    | 1.109 |
| Q0T152 | Cybe3  | Cytochrome P-450 (Cybe3) (Mus musculus)                                       | 122.29  | 1.63  | 20741  | 1860910.88 | 336541.75 | 66996180  | 26273325  | 36456044  | 32806134   | 463038    | 3820732    | 1.487 |
| Q0T152 | Prp1   | 25S proteosome non-ATPase regulatory subunit 1 (Mus musculus)                 | 1552.84 | 34.63 | 105780 | 60239368   | 60084744  | 6124520   | 65827872  | 38623472  | 70017416   | 66479388  | 6549064    | 1.109 |
| Q0T152 | Cybe3  | Cytochrome P-450 (Cybe3) (Mus musculus)                                       | 122.29  | 1.63  | 20741  | 1860910.88 | 336541.75 | 66996180  | 26273325  | 36456044  | 32806134   | 463038    | 3820732    | 1.487 |
| Q0T152 | Prp1   | 25S proteosome non-ATPase regulatory subunit 1 (Mus musculus)                 | 1552.84 | 34.63 | 105780 | 60239368   | 60084744  | 6124520   | 65827872  | 38623472  | 70017416   | 66479388  | 6549064    | 1.109 |
| Q0T152 | Cybe3  | Cytochrome P-450 (Cybe3) (Mus musculus)                                       | 122.29  | 1.63  | 20741  | 1860910.88 | 336541.75 | 66996180  | 26273325  | 36456044  | 32806134   | 463038    | 3820732    | 1.487 |
| Q0T152 | Prp1   | 25S proteosome non-ATPase regulatory subunit 1 (Mus musculus)                 | 1552.84 | 34.63 | 105780 | 60239368   | 60084744  | 6124520   | 65827872  | 38623472  | 70017416   | 66479388  | 6549064    | 1.109 |
| Q0T152 | Cybe3  | Cytochrome P-450 (Cybe3) (Mus musculus)                                       | 122.29  | 1.63  | 20741  | 1860910.88 | 336541.75 | 66996180  | 26273325  | 36456044  | 32806134   | 463038    | 3820732    | 1.487 |
| Q0T152 | Prp1   | 25S proteosome non-ATPase regulatory subunit 1 (Mus musculus)                 | 1552.84 |       |        |            |           |           |           |           |            |           |            |       |

|        |         |                                                                                                      |         |       |        |            |            |            |            |            |           |            |            |           |           |       |       |
|--------|---------|------------------------------------------------------------------------------------------------------|---------|-------|--------|------------|------------|------------|------------|------------|-----------|------------|------------|-----------|-----------|-------|-------|
| QALD4  | Arp1    | Arf GTP with Ras-GAP domain, ANK repeat and PH domain-containing protein 1 (Mus musculus)            | 166.2   | 3.72  | 162776 | 2679207.75 | 2335905    | 3327426.5  | 2054853.12 | 2397074.62 | 3005879   | 2867770.75 | 3446290    | 4494738   | 3761318   | 1.378 |       |
| QAPX1  | Arp1    | Protein of 4-homolog (Mus musculus)                                                                  | 42.1    | 3.13  | 40988  | 666121.75  | 1076563.81 | 1064711.75 | 963791.62  | 567190.25  | 0         | 587709.25  | 0          | 742867.5  | 502233.14 | 0.923 |       |
| QAPX9  | Mem1    | Protein MEM1 (Rattus norvegicus)                                                                     | 33.61   | 3.401 | 33979  | 8367387    | 90803564   | 7273779.5  | 0          | 880044     | 0         | 240912.25  | 788354.5   | 8737345   | 8977018   | 0.928 |       |
| QAPX14 | Brx1    | Serine/threonine protein phosphatase 2A.65 IDA regulatory subunit A beta isoform (Rattus norvegicus) | 292.18  | 27.79 | 66006  | 30414374   | 30035604   | 43195734   | 32062134   | 32029234   | 22858140  | 30455088   | 31729548   | 30730108  | 3         | 0.828 |       |
| QAPX16 | Brx1    | Ribosome biogenesis protein BRX1 homolog (Rattus norvegicus)                                         | 236.63  | 17.9  | 41115  | 8675498    | 91808736   | 96216138   | 9173112    | 12878808   | 8957158   | 10958760   | 53977760   | 58017046  | 12        | 1.018 |       |
| QAPX18 | Tubb3   | Tubulin beta-3 chain (Rattus norvegicus)                                                             | 1493.02 | 38.67 | 50419  | 54759340   | 553280866  | 442590480  | 476527152  | 50220480   | 486642648 | 119797400  | 96234112   | 88757606  | 2         | 1.034 |       |
| QAPX18 | Cadher8 | Cell-cadherin domain-containing protein 88B (Mus musculus)                                           | 42.32   | 0.61  | 16668  | 1219104    | 52702344   | 1540656    | 228014192  | 27103528   | 27088487  | 11696041   | 93234112   | 206241056 | 0         | 0.929 |       |
| QAVC7  | Actr3   | Actin-binding protein 3 (Rattus norvegicus)                                                          | 123.91  | 73.92 | 47357  | 19837456   | 20802344   | 151285904  | 206483632  | 191728432  | 192524128 | 79524218   | 79541615   | 8794702   | 6         | 0.721 |       |
| QAV98  | Rima    | RNA-binding motif protein 3 (Rattus norvegicus)                                                      | 143.57  | 14.1  | 4238   | 10834805   | 11526369   | 90259338   | 8433307    | 8433307    | 7292608   | 39823038   | 27343788   | 419476.12 | 11        | 0.897 |       |
| QAV87  | Hdlt    | Inactive hydroxyacid dehydratase-like protein 1 (Rattus norvegicus)                                  | 71.78   | 3.34  | 3608   | 502506     | 338201     | 407400.38  | 235036.25  | 34609.88   | 39823038  | 27343788   | 22541273   | 213196.25 | 6         | 0.932 |       |
| QAV87  | Cd173   | Parathyroidin (Rattus norvegicus)                                                                    | 287.26  | 15.44 | 66043  | 2605386.5  | 338201     | 342438.15  | 2524780.25 | 0          | 81486.12  | 745721.75  | 1008621    | 866679.62 | 940236.88 | 11    | 4.603 |
| QAVX2  | Cuon1   | Brain cytochrome c protein 1 (Rattus norvegicus)                                                     | 40.23   | 1.42  | 64848  | 1053324.50 | 3307384    | 1597291.12 | 0          | 4976230    | 0         | 245675.85  | 2418795.5  | 0         | 0         | 4.603 |       |
| QAVX2  | Cuon1   | Brain cytochrome c protein 1 (Rattus norvegicus)                                                     | 148.62  | 9.25  | 29729  | 3325290    | 0          | 0          | 0          | 0          | 0         | 0          | 0          | 0         | 0         | 2.262 |       |
| QAVX2  | Cuon1   | Brain cytochrome c protein 1 (Rattus norvegicus)                                                     | 95.96   | 6.5   | 47211  | 0          | 868808.66  | 119176.88  | 0          | 68389.56   | 207384.5  | 960770.19  | 1060148.12 | 137229.62 | 4         | 2.262 |       |
| QAVX8  | Usp1    | WD repeat domain protein 18 (Mus musculus)                                                           | 95.96   | 6.5   | 47211  | 0          | 868808.66  | 119176.88  | 0          | 68389.56   | 207384.5  | 960770.19  | 1060148.12 | 137229.62 | 4         | 2.262 |       |
| QAVX8  | Usp1    | WD repeat domain protein 18 (Mus musculus)                                                           | 95.96   | 6.5   | 47211  | 0          | 868808.66  | 119176.88  | 0          | 68389.56   | 207384.5  | 960770.19  | 1060148.12 | 137229.62 | 4         | 2.262 |       |
| QAVX8  | Usp1    | WD repeat domain protein 18 (Mus musculus)                                                           | 95.96   | 6.5   | 47211  | 0          | 868808.66  | 119176.88  | 0          | 68389.56   | 207384.5  | 960770.19  | 1060148.12 | 137229.62 | 4         | 2.262 |       |
| QAVX8  | Usp1    | WD repeat domain protein 18 (Mus musculus)                                                           | 95.96   | 6.5   | 47211  | 0          | 868808.66  | 119176.88  | 0          | 68389.56   | 207384.5  | 960770.19  | 1060148.12 | 137229.62 | 4         | 2.262 |       |
| QAVX8  | Usp1    | WD repeat domain protein 18 (Mus musculus)                                                           | 95.96   | 6.5   | 47211  | 0          | 868808.66  | 119176.88  | 0          | 68389.56   | 207384.5  | 960770.19  | 1060148.12 | 137229.62 | 4         | 2.262 |       |
| QAVX8  | Usp1    | WD repeat domain protein 18 (Mus musculus)                                                           | 95.96   | 6.5   | 47211  | 0          | 868808.66  | 119176.88  | 0          | 68389.56   | 207384.5  | 960770.19  | 1060148.12 | 137229.62 | 4         | 2.262 |       |
| QAVX8  | Usp1    | WD repeat domain protein 18 (Mus musculus)                                                           | 95.96   | 6.5   | 47211  | 0          | 868808.66  | 119176.88  | 0          | 68389.56   | 207384.5  | 960770.19  | 1060148.12 | 137229.62 | 4         | 2.262 |       |
| QAVX8  | Usp1    | WD repeat domain protein 18 (Mus musculus)                                                           | 95.96   | 6.5   | 47211  | 0          | 868808.66  | 119176.88  | 0          | 68389.56   | 207384.5  | 960770.19  | 1060148.12 | 137229.62 | 4         | 2.262 |       |
| QAVX8  | Usp1    | WD repeat domain protein 18 (Mus musculus)                                                           | 95.96   | 6.5   | 47211  | 0          | 868808.66  | 119176.88  | 0          | 68389.56   | 207384.5  | 960770.19  | 1060148.12 | 137229.62 | 4         | 2.262 |       |
| QAVX8  | Usp1    | WD repeat domain protein 18 (Mus musculus)                                                           | 95.96   | 6.5   | 47211  | 0          | 868808.66  | 119176.88  | 0          | 68389.56   | 207384.5  | 960770.19  | 1060148.12 | 137229.62 | 4         | 2.262 |       |
| QAVX8  | Usp1    | WD repeat domain protein 18 (Mus musculus)                                                           | 95.96   | 6.5   | 47211  | 0          | 868808.66  | 119176.88  | 0          | 68389.56   | 207384.5  | 960770.19  | 1060148.12 | 137229.62 | 4         | 2.262 |       |
| QAVX8  | Usp1    | WD repeat domain protein 18 (Mus musculus)                                                           | 95.96   | 6.5   | 47211  | 0          | 868808.66  | 119176.88  | 0          | 68389.56   | 207384.5  | 960770.19  | 1060148.12 | 137229.62 | 4         | 2.262 |       |
| QAVX8  | Usp1    | WD repeat domain protein 18 (Mus musculus)                                                           | 95.96   | 6.5   | 47211  | 0          | 868808.66  | 119176.88  | 0          | 68389.56   | 207384.5  | 960770.19  | 1060148.12 | 137229.62 | 4         | 2.262 |       |
| QAVX8  | Usp1    | WD repeat domain protein 18 (Mus musculus)                                                           | 95.96   | 6.5   | 47211  | 0          | 868808.66  | 119176.88  | 0          | 68389.56   | 207384.5  | 960770.19  | 1060148.12 | 137229.62 | 4         | 2.262 |       |
| QAVX8  | Usp1    | WD repeat domain protein 18 (Mus musculus)                                                           | 95.96   | 6.5   | 47211  | 0          | 868808.66  | 119176.88  | 0          | 68389.56   | 207384.5  | 960770.19  | 1060148.12 | 137229.62 | 4         | 2.262 |       |
| QAVX8  | Usp1    | WD repeat domain protein 18 (Mus musculus)                                                           | 95.96   | 6.5   | 47211  | 0          | 868808.66  | 119176.88  | 0          | 68389.56   | 207384.5  | 960770.19  | 1060148.12 | 137229.62 | 4         | 2.262 |       |
| QAVX8  | Usp1    | WD repeat domain protein 18 (Mus musculus)                                                           | 95.96   | 6.5   | 47211  | 0          | 868808.66  | 119176.88  | 0          | 68389.56   | 207384.5  | 960770.19  | 1060148.12 | 137229.62 | 4         | 2.262 |       |
| QAVX8  | Usp1    | WD repeat domain protein 18 (Mus musculus)                                                           | 95.96   | 6.5   | 47211  | 0          | 868808.66  | 119176.88  | 0          | 68389.56   | 207384.5  | 960770.19  | 1060148.12 | 137229.62 | 4         | 2.262 |       |
| QAVX8  | Usp1    | WD repeat domain protein 18 (Mus musculus)                                                           | 95.96   | 6.5   | 47211  | 0          | 868808.66  | 119176.88  | 0          | 68389.56   | 207384.5  | 960770.19  | 1060148.12 | 137229.62 | 4         | 2.262 |       |
| QAVX8  | Usp1    | WD repeat domain protein 18 (Mus musculus)                                                           | 95.96   | 6.5   | 47211  | 0          | 868808.66  | 119176.88  | 0          | 68389.56   | 207384.5  | 960770.19  | 1060148.12 | 137229.62 | 4         | 2.262 |       |
| QAVX8  | Usp1    | WD repeat domain protein 18 (Mus musculus)                                                           | 95.96   | 6.5   | 47211  | 0          | 868808.66  | 119176.88  | 0          | 68389.56   | 207384.5  | 960770.19  | 1060148.12 | 137229.62 | 4         | 2.262 |       |
| QAVX8  | Usp1    | WD repeat domain protein 18 (Mus musculus)                                                           | 95.96   | 6.5   | 47211  | 0          | 868808.66  | 119176.88  | 0          | 68389.56   | 207384.5  | 960770.19  | 1060148.12 | 137229.62 | 4         | 2.262 |       |
| QAVX8  | Usp1    | WD repeat domain protein 18 (Mus musculus)                                                           | 95.96   | 6.5   | 47211  | 0          | 868808.66  | 119176.88  | 0          | 68389.56   | 207384.5  | 960770.19  | 1060148.12 | 137229.62 | 4         | 2.262 |       |
| QAVX8  | Usp1    | WD repeat domain protein 18 (Mus musculus)                                                           | 95.96   | 6.5   | 47211  | 0          | 868808.66  | 119176.88  | 0          | 68389.56   | 207384.5  | 960770.19  | 1060148.12 | 137229.62 | 4         | 2.262 |       |
| QAVX8  | Usp1    | WD repeat domain protein 18 (Mus musculus)                                                           | 95.96   | 6.5   | 47211  | 0          | 868808.66  | 119176.88  | 0          | 68389.56   | 207384.5  | 960770.19  | 1060148.12 | 137229.62 | 4         | 2.262 |       |
| QAVX8  | Usp1    | WD repeat domain protein 18 (Mus musculus)                                                           | 95.96   | 6.5   | 47211  | 0          | 868808.66  | 119176.88  | 0          | 68389.56   | 207384.5  | 960770.19  | 1060148.12 | 137229.62 | 4         | 2.262 |       |
| QAVX8  | Usp1    | WD repeat domain protein 18 (Mus musculus)                                                           | 95.96   | 6.5   | 47211  | 0          | 868808.66  | 119176.88  | 0          | 68389.56   | 207384.5  | 960770.19  | 1060148.12 | 137229.62 | 4         | 2.262 |       |
| QAVX8  | Usp1    | WD repeat domain protein 18 (Mus musculus)                                                           | 95.96   | 6.5   | 47211  | 0          | 868808.66  | 119176.88  | 0          | 68389.56   | 207384.5  | 960770.19  | 1060148.12 | 137229.62 | 4         | 2.262 |       |
| QAVX8  | Usp1    | WD repeat domain protein 18 (Mus musculus)                                                           | 95.96   | 6.5   | 47211  | 0          | 868808.66  | 119176.88  | 0          | 68389.56   | 207384.5  | 960770.19  | 1060148.12 | 137229.62 | 4         | 2.262 |       |
| QAVX8  | Usp1    | WD repeat domain protein 18 (Mus musculus)                                                           | 95.96   | 6.5   | 47211  | 0          | 868808.66  | 119176.88  | 0          | 68389.56   | 207384.5  | 960770.19  | 1060148.12 | 137229.62 | 4         | 2.262 |       |
| QAVX8  | Usp1    | WD repeat domain protein 18 (Mus musculus)                                                           | 95.96   | 6.5   | 47211  | 0          | 868808.66  | 119176.88  | 0          | 68389.56   | 207384.5  | 960770.19  | 1060148.12 | 137229.62 | 4         | 2.262 |       |
| QAVX8  | Usp1    | WD repeat domain protein 18 (Mus musculus)                                                           | 95.96   | 6.5   | 47211  | 0          | 868808.66  | 119176.88  | 0          | 68389.56   | 207384.5  | 960770.19  | 1060148.12 | 137229.62 | 4         | 2.262 |       |
| QAVX8  | Usp1    | WD repeat domain protein 18 (Mus musculus)                                                           | 95.96   | 6.5   | 47211  | 0          | 868808.66  | 119176.88  | 0          | 68389.56   | 207384.5  | 960770.19  | 1060148.12 | 137229.62 | 4         | 2.262 |       |
| QAVX8  | Usp1    | WD repeat domain protein 18 (Mus musculus)                                                           | 95.96   | 6.5   | 47211  | 0          | 868808.66  | 119176.88  | 0          | 68389.56   | 207384.5  | 960770.19  | 1060148.12 | 137229.62 | 4         | 2.262 |       |
| QAVX8  | Usp1    | WD repeat domain protein 18 (Mus musculus)                                                           | 95.96   | 6.5   | 47211  | 0          | 868808.66  | 119176.88  | 0          | 68389.56   | 207384.5  | 960770.19  | 1060148.12 | 137229.62 | 4         | 2.262 |       |
| QAVX8  | Usp1    | WD repeat domain protein 18 (Mus musculus)                                                           | 95.96   | 6.5   | 47211  | 0          | 868808.66  | 119176.88  | 0          | 68389.56   | 207384.5  | 960770.19  | 1060148.12 | 137229.62 | 4         | 2.262 |       |
| QAVX8  | Usp1    | WD repeat domain protein 18 (Mus musculus)                                                           | 95.96   | 6.5   | 47211  | 0          | 868808.66  | 119176.88  | 0          | 68389.56   | 207384.5  | 960770.19  | 1060148.12 | 137229.62 | 4         | 2.262 |       |
| QAVX8  | Usp1    | WD repeat domain protein 18 (Mus musculus)                                                           | 95.96   | 6.5   | 47211  | 0          | 868808.66  | 119176.88  | 0          | 68389.56   | 207384.5  | 960770.19  | 1060148.12 | 137229.62 | 4         | 2.262 |       |
| QAVX8  | Usp1    | WD repeat domain protein 18 (Mus musculus)                                                           | 95.96   | 6.5   | 47211  | 0          | 868808.66  | 119176.88  | 0          | 68389.56   | 207384.5  | 960770.19  | 1060148.12 | 137229.62 | 4         | 2.262 |       |
| QAVX8  | Usp1    | WD repeat domain protein 18 (Mus musculus)                                                           | 95.96   | 6.5   | 47211  | 0          | 868808.66  | 119176.88  | 0          | 68389.56   | 207384.5  | 960770.19  | 1060148.12 | 137229.62 | 4         | 2.262 |       |
| QAVX8  | Usp1    | WD repeat domain protein 18 (Mus musculus)                                                           | 95.96   | 6.5   | 47211  | 0          | 868808.66  | 119176.88  | 0          | 68389.56   | 207384.5  | 960770.19  | 1060148.12 | 137229.62 | 4         | 2.262 |       |
| QAVX8  | Usp1    | WD repeat domain protein 18 (Mus musculus)                                                           | 95.96   | 6.5   | 47211  | 0          | 868808.66  | 119176.88  | 0          | 68389.56   | 207384.5  | 960770.19  | 1060148.12 | 137229.62 | 4         | 2.262 |       |
| QAVX8  | Usp1    | WD repeat domain protein 18 (Mus musculus)                                                           | 95.96   | 6.5   | 47211  | 0          | 868808.66  | 119176.88  | 0          | 68389.56   | 207384.5  | 960770.19  | 1060148.12 | 137229.62 | 4         | 2.262 |       |
| QAVX8  | Usp1    | WD repeat domain protein 18 (Mus musculus)                                                           | 95.96   | 6.5   | 47211  | 0          | 868808.66  | 119176.88  | 0          | 68389.56   | 207384.5  | 960770.19  | 1060148.12 | 137229.62 | 4         | 2.262 |       |
| QAVX8  | Usp1    | WD repeat domain protein 18 (Mus musculus)                                                           | 95.96   | 6.5   | 47211  | 0          | 868808.66  | 119176.88  | 0          | 68389.56   | 207384.5  | 960770.19  | 1060148.12 | 137229.62 | 4         | 2.262 |       |
| QAVX8  | Usp1    | WD repeat domain protein 18 (Mus musculus)                                                           | 95.96   | 6.5   | 47211  | 0          | 868808.66  | 119176.88  | 0          | 68389.56   | 207384.5  | 960770.19  | 1060148.12 | 137229.62 | 4         | 2.262 |       |
| QAVX8  | Usp1    | WD repeat domain protein 18 (Mus musculus)                                                           | 95.96   | 6.5   | 47211  | 0          | 868808.66  | 119176.88  | 0          | 68389.56   | 207384.5  | 960770.19  | 1060148.12 | 137229.62 | 4         | 2.262 |       |
| QAVX8  | Usp1    | WD repeat domain protein 18 (Mus musculus)                                                           | 95.96   | 6.5   | 47211  | 0          | 868808.66  | 119176.88  | 0          | 68389.56   | 207384.5  | 960770.19  | 1060148.12 | 137229.62 | 4         | 2.262 |       |
| QAVX8  | Usp1    | WD repeat domain protein 18 (Mus musculus)                                                           | 95.96   | 6.5   | 47211  | 0          | 868808.66  | 119176.88  | 0          | 68389.56   | 207384.5  | 960770.19  | 1060148.12 | 137229.62 | 4         | 2.262 |       |
| QAVX8  | Usp1    | WD repeat domain protein 18 (Mus musculus)                                                           | 95.96   | 6.5   | 47211  | 0          | 868808.66  | 119176.88  | 0          | 68389.56   | 207384.5  | 960770.19  | 1060148.12 | 137229.62 | 4         | 2     |       |







|        |         |                                                                             |          |       |        |            |              |            |            |            |           |            |            |            |           |       |
|--------|---------|-----------------------------------------------------------------------------|----------|-------|--------|------------|--------------|------------|------------|------------|-----------|------------|------------|------------|-----------|-------|
| Q093H2 | Nes     | Nestin (Mus musculus)                                                       | 2575.19  | 30.58 | 207124 | 60833044   | 47796800     | 61088320   | 33808144   | 71421352   | 60916596  | 62513756   | 65956756   | 68323827   | 69809960  | 11171 |
| Q093G2 | Mecl1   | Calcium uptake protein 1 (rat, rhodophilic) (Rattus norvegicus)             | 6.6      | 3.56  | 54105  | 165024.19  | 0            | 387046.72  | 0          | 197030.92  | 0         | 183691.31  | 241028.98  | 204959.64  | 12        | 11505 |
| Q093J1 | Sit3a11 | Zinc transporter ZTP11 (Rattus norvegicus)                                  | 83.74    | 6.57  | 34868  | 257823.14  | 0            | 362723.34  | 0          | 274659.47  | 342839.25 | 570687.25  | 681900.25  | 236434.56  | 319903.38 | 8     |
| Q093J4 | Sit1    | Nucleotide exchange factor SNT1 (Rattus norvegicus)                         | 51.26    | 2.15  | 52550  | 6205527.06 | 0            | 143967.28  | 0          | 488361.1   | 245312.35 | 3569897    | 3569897    | 0          | 14        | 1143  |
| Q093J4 | En2     | Enthoderm membrane-associated protein-like 2 (Rattus norvegicus)            | 12312.15 | 7.7   | 70711  | 226644.75  | 0            | 176249.88  | 0          | 488361.1   | 645209.11 | 67991448   | 9780876    | 68182976   | 0         | 14    |
| Q093J4 | Bowl1   | Basic leucine zipper and W2 domain-containing protein 1 (Rattus norvegicus) | 143.16   | 64.44 | 48043  | 33201536   | 64729296     | 55738528   | 102634164  | 59071148   | 55240088  | 12349710   | 153718.25  | 153718.25  | 12        | 1141  |
| Q093J4 | Bowl2   | BRIC1 and BRIC1-A complex member 2 (Rattus norvegicus)                      | 1278.49  | 64.44 | 48043  | 33201536   | 64729296     | 55738528   | 102634164  | 59071148   | 55240088  | 12349710   | 153718.25  | 153718.25  | 12        | 1141  |
| Q093J4 | Snv6    | Sorting nexin 6 (Mus musculus)                                              | 129.9    | 7.57  | 43559  | 189792.42  | 23217578.5   | 2426107.31 | 3689192.15 | 1038787.81 | 137378.25 | 3689192.15 | 3689192.15 | 3689192.15 | 12        | 1141  |
| Q093J4 | Kl15    | Kinesin-like protein KLP15 (Mus musculus)                                   | 299.49   | 14.29 | 46409  | 300572.75  | 0            | 6181412.5  | 0          | 283160.25  | 436044    | 0          | 0          | 0          | 0         | 0.593 |
| Q093J4 | Kl11    | Kinesin-like protein KLP11 (Mus musculus)                                   | 56.53    | 0.79  | 0      | 0          | 0            | 0          | 0          | 0          | 0         | 0          | 0          | 0          | 0         | 0     |
| Q093J4 | Kl11    | Kinesin-like protein KLP11 (Mus musculus)                                   | 245.7    | 5.7   | 118027 | 174001.25  | 367474.4     | 878250.5   | 232938.61  | 201758.98  | 201758.98 | 201758.98  | 201758.98  | 201758.98  | 13        | 1137  |
| Q093J4 | Flad1   | FHL1/H2 domain-containing protein 1 (Mus musculus)                          | 51.6     | 1.09  | 12607  | 12607.36   | 223532.95    | 296263.21  | 3387476    | 0          | 211054.99 | 3371410.5  | 3371410.5  | 3371410.5  | 11        | 1137  |
| Q093J4 | Dad31   | ATP-dependent RNA helicase DDX31 (Mus musculus)                             | 62.46    | 2.35  | 70368  | 14137.5    | 0            | 179023.83  | 0          | 824398.75  | 926894.75 | 149016.62  | 80708.36   | 77         | 1139      |       |
| Q093J4 | Dad1    | Serine/threonine protein kinase OSR1 (Mus musculus)                         | 270.15   | 15.47 | 38214  | 293536.5   | 0            | 4441650.5  | 0          | 166535.68  | 1007120.6 | 166535.68  | 166535.68  | 166535.68  | 13        | 1106  |
| Q093J4 | Dad1    | ATP-dependent RNA helicase DDX1 (Mus musculus)                              | 123.11   | 4.12  | 66224  | 118048.5   | 1038830.06   | 119705.75  | 513163     | 895330.36  | 119785.62 | 142327.38  | 1184000    | 144082.25  | 144082.25 | 5     |
| Q093J4 | Dad1    | ATP-dependent RNA helicase DDX1 (Mus musculus)                              | 123.11   | 4.12  | 66224  | 118048.5   | 1038830.06   | 119705.75  | 513163     | 895330.36  | 119785.62 | 142327.38  | 1184000    | 144082.25  | 144082.25 | 5     |
| Q093J4 | Dad1    | ATP-dependent RNA helicase DDX1 (Mus musculus)                              | 123.11   | 4.12  | 66224  | 118048.5   | 1038830.06   | 119705.75  | 513163     | 895330.36  | 119785.62 | 142327.38  | 1184000    | 144082.25  | 144082.25 | 5     |
| Q093J4 | Dad1    | ATP-dependent RNA helicase DDX1 (Mus musculus)                              | 123.11   | 4.12  | 66224  | 118048.5   | 1038830.06   | 119705.75  | 513163     | 895330.36  | 119785.62 | 142327.38  | 1184000    | 144082.25  | 144082.25 | 5     |
| Q093J4 | Dad1    | ATP-dependent RNA helicase DDX1 (Mus musculus)                              | 123.11   | 4.12  | 66224  | 118048.5   | 1038830.06   | 119705.75  | 513163     | 895330.36  | 119785.62 | 142327.38  | 1184000    | 144082.25  | 144082.25 | 5     |
| Q093J4 | Dad1    | ATP-dependent RNA helicase DDX1 (Mus musculus)                              | 123.11   | 4.12  | 66224  | 118048.5   | 1038830.06   | 119705.75  | 513163     | 895330.36  | 119785.62 | 142327.38  | 1184000    | 144082.25  | 144082.25 | 5     |
| Q093J4 | Dad1    | ATP-dependent RNA helicase DDX1 (Mus musculus)                              | 123.11   | 4.12  | 66224  | 118048.5   | 1038830.06   | 119705.75  | 513163     | 895330.36  | 119785.62 | 142327.38  | 1184000    | 144082.25  | 144082.25 | 5     |
| Q093J4 | Dad1    | ATP-dependent RNA helicase DDX1 (Mus musculus)                              | 123.11   | 4.12  | 66224  | 118048.5   | 1038830.06   | 119705.75  | 513163     | 895330.36  | 119785.62 | 142327.38  | 1184000    | 144082.25  | 144082.25 | 5     |
| Q093J4 | Dad1    | ATP-dependent RNA helicase DDX1 (Mus musculus)                              | 123.11   | 4.12  | 66224  | 118048.5   | 1038830.06   | 119705.75  | 513163     | 895330.36  | 119785.62 | 142327.38  | 1184000    | 144082.25  | 144082.25 | 5     |
| Q093J4 | Dad1    | ATP-dependent RNA helicase DDX1 (Mus musculus)                              | 123.11   | 4.12  | 66224  | 118048.5   | 1038830.06   | 119705.75  | 513163     | 895330.36  | 119785.62 | 142327.38  | 1184000    | 144082.25  | 144082.25 | 5     |
| Q093J4 | Dad1    | ATP-dependent RNA helicase DDX1 (Mus musculus)                              | 123.11   | 4.12  | 66224  | 118048.5   | 1038830.06   | 119705.75  | 513163     | 895330.36  | 119785.62 | 142327.38  | 1184000    | 144082.25  | 144082.25 | 5     |
| Q093J4 | Dad1    | ATP-dependent RNA helicase DDX1 (Mus musculus)                              | 123.11   | 4.12  | 66224  | 118048.5   | 1038830.06   | 119705.75  | 513163     | 895330.36  | 119785.62 | 142327.38  | 1184000    | 144082.25  | 144082.25 | 5     |
| Q093J4 | Dad1    | ATP-dependent RNA helicase DDX1 (Mus musculus)                              | 123.11   | 4.12  | 66224  | 118048.5   | 1038830.06   | 119705.75  | 513163     | 895330.36  | 119785.62 | 142327.38  | 1184000    | 144082.25  | 144082.25 | 5     |
| Q093J4 | Dad1    | ATP-dependent RNA helicase DDX1 (Mus musculus)                              | 123.11   | 4.12  | 66224  | 118048.5   | 1038830.06   | 119705.75  | 513163     | 895330.36  | 119785.62 | 142327.38  | 1184000    | 144082.25  | 144082.25 | 5     |
| Q093J4 | Dad1    | ATP-dependent RNA helicase DDX1 (Mus musculus)                              | 123.11   | 4.12  | 66224  | 118048.5   | 1038830.06   | 119705.75  | 513163     | 895330.36  | 119785.62 | 142327.38  | 1184000    | 144082.25  | 144082.25 | 5     |
| Q093J4 | Dad1    | ATP-dependent RNA helicase DDX1 (Mus musculus)                              | 123.11   | 4.12  | 66224  | 118048.5   | 1038830.06   | 119705.75  | 513163     | 895330.36  | 119785.62 | 142327.38  | 1184000    | 144082.25  | 144082.25 | 5     |
| Q093J4 | Dad1    | ATP-dependent RNA helicase DDX1 (Mus musculus)                              | 123.11   | 4.12  | 66224  | 118048.5   | 1038830.06   | 119705.75  | 513163     | 895330.36  | 119785.62 | 142327.38  | 1184000    | 144082.25  | 144082.25 | 5     |
| Q093J4 | Dad1    | ATP-dependent RNA helicase DDX1 (Mus musculus)                              | 123.11   | 4.12  | 66224  | 118048.5   | 1038830.06   | 119705.75  | 513163     | 895330.36  | 119785.62 | 142327.38  | 1184000    | 144082.25  | 144082.25 | 5     |
| Q093J4 | Dad1    | ATP-dependent RNA helicase DDX1 (Mus musculus)                              | 123.11   | 4.12  | 66224  | 118048.5   | 1038830.06   | 119705.75  | 513163     | 895330.36  | 119785.62 | 142327.38  | 1184000    | 144082.25  | 144082.25 | 5     |
| Q093J4 | Dad1    | ATP-dependent RNA helicase DDX1 (Mus musculus)                              | 123.11   | 4.12  | 66224  | 118048.5   | 1038830.06   | 119705.75  | 513163     | 895330.36  | 119785.62 | 142327.38  | 1184000    | 144082.25  | 144082.25 | 5     |
| Q093J4 | Dad1    | ATP-dependent RNA helicase DDX1 (Mus musculus)                              | 123.11   | 4.12  | 66224  | 118048.5   | 1038830.06   | 119705.75  | 513163     | 895330.36  | 119785.62 | 142327.38  | 1184000    | 144082.25  | 144082.25 | 5     |
| Q093J4 | Dad1    | ATP-dependent RNA helicase DDX1 (Mus musculus)                              | 123.11   | 4.12  | 66224  | 118048.5   | 1038830.06   | 119705.75  | 513163     | 895330.36  | 119785.62 | 142327.38  | 1184000    | 144082.25  | 144082.25 | 5     |
| Q093J4 | Dad1    | ATP-dependent RNA helicase DDX1 (Mus musculus)                              | 123.11   | 4.12  | 66224  | 118048.5   | 1038830.06   | 119705.75  | 513163     | 895330.36  | 119785.62 | 142327.38  | 1184000    | 144082.25  | 144082.25 | 5     |
| Q093J4 | Dad1    | ATP-dependent RNA helicase DDX1 (Mus musculus)                              | 123.11   | 4.12  | 66224  | 118048.5   | 1038830.06   | 119705.75  | 513163     | 895330.36  | 119785.62 | 142327.38  | 1184000    | 144082.25  | 144082.25 | 5     |
| Q093J4 | Dad1    | ATP-dependent RNA helicase DDX1 (Mus musculus)                              | 123.11   | 4.12  | 66224  | 118048.5   | 1038830.06   | 119705.75  | 513163     | 895330.36  | 119785.62 | 142327.38  | 1184000    | 144082.25  | 144082.25 | 5     |
| Q093J4 | Dad1    | ATP-dependent RNA helicase DDX1 (Mus musculus)                              | 123.11   | 4.12  | 66224  | 118048.5   | 1038830.06   | 119705.75  | 513163     | 895330.36  | 119785.62 | 142327.38  | 1184000    | 144082.25  | 144082.25 | 5     |
| Q093J4 | Dad1    | ATP-dependent RNA helicase DDX1 (Mus musculus)                              | 123.11   | 4.12  | 66224  | 118048.5   | 1038830.06   | 119705.75  | 513163     | 895330.36  | 119785.62 | 142327.38  | 1184000    | 144082.25  | 144082.25 | 5     |
| Q093J4 | Dad1    | ATP-dependent RNA helicase DDX1 (Mus musculus)                              | 123.11   | 4.12  | 66224  | 118048.5   | 1038830.06   | 119705.75  | 513163     | 895330.36  | 119785.62 | 142327.38  | 1184000    | 144082.25  | 144082.25 | 5     |
| Q093J4 | Dad1    | ATP-dependent RNA helicase DDX1 (Mus musculus)                              | 123.11   | 4.12  | 66224  | 118048.5   | 1038830.06   | 119705.75  | 513163     | 895330.36  | 119785.62 | 142327.38  | 1184000    | 144082.25  | 144082.25 | 5     |
| Q093J4 | Dad1    | ATP-dependent RNA helicase DDX1 (Mus musculus)                              | 123.11   | 4.12  | 66224  | 118048.5   | 1038830.06   | 119705.75  | 513163     | 895330.36  | 119785.62 | 142327.38  | 1184000    | 144082.25  | 144082.25 | 5     |
| Q093J4 | Dad1    | ATP-dependent RNA helicase DDX1 (Mus musculus)                              | 123.11   | 4.12  | 66224  | 118048.5   | 1038830.06   | 119705.75  | 513163     | 895330.36  | 119785.62 | 142327.38  | 1184000    | 144082.25  | 144082.25 | 5     |
| Q093J4 | Dad1    | ATP-dependent RNA helicase DDX1 (Mus musculus)                              | 123.11   | 4.12  | 66224  | 118048.5   | 1038830.06   | 119705.75  | 513163     | 895330.36  | 119785.62 | 142327.38  | 1184000    | 144082.25  | 144082.25 | 5     |
| Q093J4 | Dad1    | ATP-dependent RNA helicase DDX1 (Mus musculus)                              | 123.11   | 4.12  | 66224  | 118048.5   | 1038830.06   | 119705.75  | 513163     | 895330.36  | 119785.62 | 142327.38  | 1184000    | 144082.25  | 144082.25 | 5     |
| Q093J4 | Dad1    | ATP-dependent RNA helicase DDX1 (Mus musculus)                              | 123.11   | 4.12  | 66224  | 118048.5   | 1038830.06   | 119705.75  | 513163     | 895330.36  | 119785.62 | 142327.38  | 1184000    | 144082.25  | 144082.25 | 5     |
| Q093J4 | Dad1    | ATP-dependent RNA helicase DDX1 (Mus musculus)                              | 123.11   | 4.12  | 66224  | 118048.5   | 1038830.06   | 119705.75  | 513163     | 895330.36  | 119785.62 | 142327.38  | 1184000    | 144082.25  | 144082.25 | 5     |
| Q093J4 | Dad1    | ATP-dependent RNA helicase DDX1 (Mus musculus)                              | 123.11   | 4.12  | 66224  | 118048.5   | 1038830.06   | 119705.75  | 513163     | 895330.36  | 119785.62 | 142327.38  | 1184000    | 144082.25  | 144082.25 | 5     |
| Q093J4 | Dad1    | ATP-dependent RNA helicase DDX1 (Mus musculus)                              | 123.11   | 4.12  | 66224  | 118048.5   | 1038830.06   | 119705.75  | 513163     | 895330.36  | 119785.62 | 142327.38  | 1184000    | 144082.25  | 144082.25 | 5     |
| Q093J4 | Dad1    | ATP-dependent RNA helicase DDX1 (Mus musculus)                              | 123.11   | 4.12  | 66224  | 118048.5   | 1038830.06   | 119705.75  | 513163     | 895330.36  | 119785.62 | 142327.38  | 1184000    | 144082.25  | 144082.25 | 5     |
| Q093J4 | Dad1    | ATP-dependent RNA helicase DDX1 (Mus musculus)                              | 123.11   | 4.12  | 66224  | 118048.5   | 1038830.06   | 119705.75  | 513163     | 895330.36  | 119785.62 | 142327.38  | 1184000    | 144082.25  | 144082.25 | 5     |
| Q093J4 | Dad1    | ATP-dependent RNA helicase DDX1 (Mus musculus)                              | 123.11   | 4.12  | 66224  | 118048.5   | 1038830.06   | 119705.75  | 513163     | 895330.36  | 119785.62 | 142327.38  | 1184000    | 144082.25  | 144082.25 | 5     |
| Q093J4 | Dad1    | ATP-dependent RNA helicase DDX1 (Mus musculus)                              | 123.11   | 4.12  | 66224  | 118048.5   | 1038830.06   | 119705.75  | 513163     | 895330.36  | 119785.62 | 142327.38  | 1184000    | 144082.25  | 144082.25 | 5     |
| Q093J4 | Dad1    | ATP-dependent RNA helicase DDX1 (Mus musculus)                              | 123.11   | 4.12  | 66224  | 118048.5   | 1038830.06   | 119705.75  | 513163     | 895330.36  | 119785.62 | 142327.38  | 1184000    | 144082.25  | 144082.25 | 5     |
| Q093J4 | Dad1    | ATP-dependent RNA helicase DDX1 (Mus musculus)                              | 123.11   | 4.12  | 66224  | 118048.5   | 1038830.06   | 119705.75  | 513163     | 895330.36  | 119785.62 | 142327.38  | 1184000    | 144082.25  | 144082.25 | 5     |
| Q093J4 | Dad1    | ATP-dependent RNA helicase DDX1 (Mus musculus)                              | 123.11   | 4.12  | 66224  | 118048.5   | 1038830.06   | 119705.75  | 513163     | 895330.36  | 119785.62 | 142327.38  | 1184000    | 144082.25  | 144082.25 | 5     |
| Q093J4 | Dad1    | ATP-dependent RNA helicase DDX1 (Mus musculus)                              | 123.11   | 4.12  | 66224  | 118048.5   | 1038830.06   | 119705.75  | 513163     | 895330.36  | 119785.62 | 142327.38  | 1184000    | 144082.25  | 144082.25 | 5     |
| Q093J4 | Dad1    | ATP-dependent RNA helicase DDX1 (Mus musculus)                              | 123.11   | 4.12  | 66224  | 118048.5   | 1038830.06</ |            |            |            |           |            |            |            |           |       |

|        |         |                                                                    |         |       |        |    |          |          |           |            |           |            |             |            |           |            |           |       |
|--------|---------|--------------------------------------------------------------------|---------|-------|--------|----|----------|----------|-----------|------------|-----------|------------|-------------|------------|-----------|------------|-----------|-------|
| OTTM00 | Pept    | 1,500000 Pro-X carboxypeptidase (Mus musculus)                     | 145.15  | 9.57  | 59027  | 1  | 2        | 0        | 280065.59 | 807590.45  | 315601.59 | 317323.31  | 587373.69   | 127112.14  | 935307.16 | 392126.47  | 472782.19 | 1.091 |
| OTTM07 | Intp8   | Intp8p8 (Mus musculus)                                             | 125.2   | 2.57  | 117078 | 1  | 2        | 0        | 292848.58 | 443930.20  | 514236.56 | 517222.22  | 267136.25   | 2471367.25 | 261510    | 221602.75  | 472782.19 | 0.997 |
| OTTMX7 | Hwe1    | E3 ubiquitin-protein ligase HWE1 (Mus musculus)                    | 754.27  | 4.91  | 483635 | 14 | 8        | 0        | 860797.97 | 241677.22  | 3558170.4 | 377688.84  | 927481.4    | 997188.4   | 1879766   | 330360.42  | 11.2      | 0.866 |
| OTTMN3 | Lac7/2  | Purative RNA-binding protein Lac7/2 (Mus musculus)                 | 360.66  | 22.19 | 46383  | 8  | 1        | 0        | 15953866  | 18434930   | 20202706  | 17554466   | 17091666    | 15964630   | 487632.84 | 666888.51  | 1879766   | 0.938 |
| OTTMN3 | Sprp7   | Sperm-associated antigen 7 (Mus musculus)                          | 41.94   | 10.13 | 25921  | 1  | 1        | 0        | 6183161   | 437051.25  | 279169.31 | 484911.72  | 88715046    | 437657.5   | 467632.84 | 286350.78  | 48506.81  | 0.631 |
| OTTPD0 | Ser1    | Tarbasein-associated protein subunit alpha (Rattus norvegicus)     | 123.95  | 7.21  | 33629  | 1  | 1        | 0        | 8488896   | 10365602   | 171108.5  | 10731379   | 10042147    | 10257873   | 8918402   | 86609764   | 7496066   | 1.2   |
| OTTPV4 | Actn1   | Alpha-actinin 1 (Mus musculus)                                     | 1702.46 | 30.72 | 103668 | 26 | 67246616 | 77566416 | 78639739  | 75246656   | 744488936 | 75946656   | 81892144    | 77900288   | 77061240  | 80370424   | 8769060   | 1.085 |
| OTTPV4 | Myb1b1a | Myb-binding protein 1A (Mus musculus)                              | 729.38  | 10.94 | 153037 | 26 | 67246616 | 78639739 | 8947848   | 106540628  | 10015083  | 1133762    | 9940156     | 7143888    | 7980702   | 6721491.5  | 33104.47  | 0.819 |
| OTTPV4 | Nit1    | Deaminated glutathione oxidase (Rattus norvegicus)                 | 51.21   | 5.2   | 36094  | 1  | 1        | 0        | 332141.16 | 335147.12  | 335147.12 | 335147.12  | 335147.12   | 335147.12  | 335147.12 | 335147.12  | 335147.12 | 0.828 |
| OTTPV4 | Arad1   | Acan 2 (the protein) (Mus musculus)                                | 328.78  | 8.87  | 110649 | 7  | 0        | 0        | 835302.45 | 880311.8   | 83876.26  | 8907378    | 11914946    | 9853129    | 1102549   | 921534     | 8673146   | 1.007 |
| OTTPV4 | Lap10   | Low-density lipoprotein receptor-related protein 10 (Mus musculus) | 43.84   | 0.98  | 4377   | 1  | 1        | 0        | 601348.48 | 87401.28   | 38436.81  | 8907378    | 11914946    | 9853129    | 1102549   | 921534     | 8673146   | 1.007 |
| OTTPV4 | Intp7   | Integrator complex subunit 7 (Mus musculus)                        | 43.84   | 1.35  | 100681 | 1  | 1        | 0        | 235930.98 | 378017.25  | 387501.28 | 386500.72  | 417684.62   | 470710.19  | 470710.19 | 470710.19  | 470710.19 | 1.239 |
| OTTPV4 | Clp4p1  | Cyclodextrin-associated protein 2 (Mus musculus)                   | 42.39   | 3.09  | 82699  | 1  | 1        | 0        | 340939.98 | 176726.25  | 145357.83 | 10562583   | 2227230.08  | 417684.62  | 470710.19 | 470710.19  | 470710.19 | 0.882 |
| OTTPV4 | Ube4p1  | Ubiquitin-conjugating enzyme E2 Q1 (Mus musculus)                  | 350.51  | 10.98 | 46357  | 6  | 1        | 0        | 348069.65 | 3908530.45 | 460602.65 | 4638400.45 | 36763147.25 | 2264737.75 | 438938    | 2792892.25 | 440717    | 0.888 |
| OTTPV4 | Ube2p1  | Ubiquitin-conjugating enzyme E2 Q2 (Mus musculus)                  | 350.51  | 10.98 | 46357  | 6  | 1        | 0        | 348069.65 | 3908530.45 | 460602.65 | 4638400.45 | 36763147.25 | 2264737.75 | 438938    | 2792892.25 | 440717    | 0.888 |
| OTTPV4 | Ube2p2  | Ubiquitin-conjugating enzyme E2 Q3 (Mus musculus)                  | 350.51  | 10.98 | 46357  | 6  | 1        | 0        | 348069.65 | 3908530.45 | 460602.65 | 4638400.45 | 36763147.25 | 2264737.75 | 438938    | 2792892.25 | 440717    | 0.888 |
| OTTPV4 | Ube2p3  | Ubiquitin-conjugating enzyme E2 Q4 (Mus musculus)                  | 350.51  | 10.98 | 46357  | 6  | 1        | 0        | 348069.65 | 3908530.45 | 460602.65 | 4638400.45 | 36763147.25 | 2264737.75 | 438938    | 2792892.25 | 440717    | 0.888 |
| OTTPV4 | Ube2p4  | Ubiquitin-conjugating enzyme E2 Q5 (Mus musculus)                  | 350.51  | 10.98 | 46357  | 6  | 1        | 0        | 348069.65 | 3908530.45 | 460602.65 | 4638400.45 | 36763147.25 | 2264737.75 | 438938    | 2792892.25 | 440717    | 0.888 |
| OTTPV4 | Ube2p5  | Ubiquitin-conjugating enzyme E2 Q6 (Mus musculus)                  | 350.51  | 10.98 | 46357  | 6  | 1        | 0        | 348069.65 | 3908530.45 | 460602.65 | 4638400.45 | 36763147.25 | 2264737.75 | 438938    | 2792892.25 | 440717    | 0.888 |
| OTTPV4 | Ube2p6  | Ubiquitin-conjugating enzyme E2 Q7 (Mus musculus)                  | 350.51  | 10.98 | 46357  | 6  | 1        | 0        | 348069.65 | 3908530.45 | 460602.65 | 4638400.45 | 36763147.25 | 2264737.75 | 438938    | 2792892.25 | 440717    | 0.888 |
| OTTPV4 | Ube2p7  | Ubiquitin-conjugating enzyme E2 Q8 (Mus musculus)                  | 350.51  | 10.98 | 46357  | 6  | 1        | 0        | 348069.65 | 3908530.45 | 460602.65 | 4638400.45 | 36763147.25 | 2264737.75 | 438938    | 2792892.25 | 440717    | 0.888 |
| OTTPV4 | Ube2p8  | Ubiquitin-conjugating enzyme E2 Q9 (Mus musculus)                  | 350.51  | 10.98 | 46357  | 6  | 1        | 0        | 348069.65 | 3908530.45 | 460602.65 | 4638400.45 | 36763147.25 | 2264737.75 | 438938    | 2792892.25 | 440717    | 0.888 |
| OTTPV4 | Ube2p9  | Ubiquitin-conjugating enzyme E2 Q10 (Mus musculus)                 | 350.51  | 10.98 | 46357  | 6  | 1        | 0        | 348069.65 | 3908530.45 | 460602.65 | 4638400.45 | 36763147.25 | 2264737.75 | 438938    | 2792892.25 | 440717    | 0.888 |
| OTTPV4 | Ube2p10 | Ubiquitin-conjugating enzyme E2 Q11 (Mus musculus)                 | 350.51  | 10.98 | 46357  | 6  | 1        | 0        | 348069.65 | 3908530.45 | 460602.65 | 4638400.45 | 36763147.25 | 2264737.75 | 438938    | 2792892.25 | 440717    | 0.888 |
| OTTPV4 | Ube2p11 | Ubiquitin-conjugating enzyme E2 Q12 (Mus musculus)                 | 350.51  | 10.98 | 46357  | 6  | 1        | 0        | 348069.65 | 3908530.45 | 460602.65 | 4638400.45 | 36763147.25 | 2264737.75 | 438938    | 2792892.25 | 440717    | 0.888 |
| OTTPV4 | Ube2p12 | Ubiquitin-conjugating enzyme E2 Q13 (Mus musculus)                 | 350.51  | 10.98 | 46357  | 6  | 1        | 0        | 348069.65 | 3908530.45 | 460602.65 | 4638400.45 | 36763147.25 | 2264737.75 | 438938    | 2792892.25 | 440717    | 0.888 |
| OTTPV4 | Ube2p13 | Ubiquitin-conjugating enzyme E2 Q14 (Mus musculus)                 | 350.51  | 10.98 | 46357  | 6  | 1        | 0        | 348069.65 | 3908530.45 | 460602.65 | 4638400.45 | 36763147.25 | 2264737.75 | 438938    | 2792892.25 | 440717    | 0.888 |
| OTTPV4 | Ube2p14 | Ubiquitin-conjugating enzyme E2 Q15 (Mus musculus)                 | 350.51  | 10.98 | 46357  | 6  | 1        | 0        | 348069.65 | 3908530.45 | 460602.65 | 4638400.45 | 36763147.25 | 2264737.75 | 438938    | 2792892.25 | 440717    | 0.888 |
| OTTPV4 | Ube2p15 | Ubiquitin-conjugating enzyme E2 Q16 (Mus musculus)                 | 350.51  | 10.98 | 46357  | 6  | 1        | 0        | 348069.65 | 3908530.45 | 460602.65 | 4638400.45 | 36763147.25 | 2264737.75 | 438938    | 2792892.25 | 440717    | 0.888 |
| OTTPV4 | Ube2p16 | Ubiquitin-conjugating enzyme E2 Q17 (Mus musculus)                 | 350.51  | 10.98 | 46357  | 6  | 1        | 0        | 348069.65 | 3908530.45 | 460602.65 | 4638400.45 | 36763147.25 | 2264737.75 | 438938    | 2792892.25 | 440717    | 0.888 |
| OTTPV4 | Ube2p17 | Ubiquitin-conjugating enzyme E2 Q18 (Mus musculus)                 | 350.51  | 10.98 | 46357  | 6  | 1        | 0        | 348069.65 | 3908530.45 | 460602.65 | 4638400.45 | 36763147.25 | 2264737.75 | 438938    | 2792892.25 | 440717    | 0.888 |
| OTTPV4 | Ube2p18 | Ubiquitin-conjugating enzyme E2 Q19 (Mus musculus)                 | 350.51  | 10.98 | 46357  | 6  | 1        | 0        | 348069.65 | 3908530.45 | 460602.65 | 4638400.45 | 36763147.25 | 2264737.75 | 438938    | 2792892.25 | 440717    | 0.888 |
| OTTPV4 | Ube2p19 | Ubiquitin-conjugating enzyme E2 Q20 (Mus musculus)                 | 350.51  | 10.98 | 46357  | 6  | 1        | 0        | 348069.65 | 3908530.45 | 460602.65 | 4638400.45 | 36763147.25 | 2264737.75 | 438938    | 2792892.25 | 440717    | 0.888 |
| OTTPV4 | Ube2p20 | Ubiquitin-conjugating enzyme E2 Q21 (Mus musculus)                 | 350.51  | 10.98 | 46357  | 6  | 1        | 0        | 348069.65 | 3908530.45 | 460602.65 | 4638400.45 | 36763147.25 | 2264737.75 | 438938    | 2792892.25 | 440717    | 0.888 |
| OTTPV4 | Ube2p21 | Ubiquitin-conjugating enzyme E2 Q22 (Mus musculus)                 | 350.51  | 10.98 | 46357  | 6  | 1        | 0        | 348069.65 | 3908530.45 | 460602.65 | 4638400.45 | 36763147.25 | 2264737.75 | 438938    | 2792892.25 | 440717    | 0.888 |
| OTTPV4 | Ube2p22 | Ubiquitin-conjugating enzyme E2 Q23 (Mus musculus)                 | 350.51  | 10.98 | 46357  | 6  | 1        | 0        | 348069.65 | 3908530.45 | 460602.65 | 4638400.45 | 36763147.25 | 2264737.75 | 438938    | 2792892.25 | 440717    | 0.888 |
| OTTPV4 | Ube2p23 | Ubiquitin-conjugating enzyme E2 Q24 (Mus musculus)                 | 350.51  | 10.98 | 46357  | 6  | 1        | 0        | 348069.65 | 3908530.45 | 460602.65 | 4638400.45 | 36763147.25 | 2264737.75 | 438938    | 2792892.25 | 440717    | 0.888 |
| OTTPV4 | Ube2p24 | Ubiquitin-conjugating enzyme E2 Q25 (Mus musculus)                 | 350.51  | 10.98 | 46357  | 6  | 1        | 0        | 348069.65 | 3908530.45 | 460602.65 | 4638400.45 | 36763147.25 | 2264737.75 | 438938    | 2792892.25 | 440717    | 0.888 |
| OTTPV4 | Ube2p25 | Ubiquitin-conjugating enzyme E2 Q26 (Mus musculus)                 | 350.51  | 10.98 | 46357  | 6  | 1        | 0        | 348069.65 | 3908530.45 | 460602.65 | 4638400.45 | 36763147.25 | 2264737.75 | 438938    | 2792892.25 | 440717    | 0.888 |
| OTTPV4 | Ube2p26 | Ubiquitin-conjugating enzyme E2 Q27 (Mus musculus)                 | 350.51  | 10.98 | 46357  | 6  | 1        | 0        | 348069.65 | 3908530.45 | 460602.65 | 4638400.45 | 36763147.25 | 2264737.75 | 438938    | 2792892.25 | 440717    | 0.888 |
| OTTPV4 | Ube2p27 | Ubiquitin-conjugating enzyme E2 Q28 (Mus musculus)                 | 350.51  | 10.98 | 46357  | 6  | 1        | 0        | 348069.65 | 3908530.45 | 460602.65 | 4638400.45 | 36763147.25 | 2264737.75 | 438938    | 2792892.25 | 440717    | 0.888 |
| OTTPV4 | Ube2p28 | Ubiquitin-conjugating enzyme E2 Q29 (Mus musculus)                 | 350.51  | 10.98 | 46357  | 6  | 1        | 0        | 348069.65 | 3908530.45 | 460602.65 | 4638400.45 | 36763147.25 | 2264737.75 | 438938    | 2792892.25 | 440717    | 0.888 |
| OTTPV4 | Ube2p29 | Ubiquitin-conjugating enzyme E2 Q30 (Mus musculus)                 | 350.51  | 10.98 | 46357  | 6  | 1        | 0        | 348069.65 | 3908530.45 | 460602.65 | 4638400.45 | 36763147.25 | 2264737.75 | 438938    | 2792892.25 | 440717    | 0.888 |
| OTTPV4 | Ube2p30 | Ubiquitin-conjugating enzyme E2 Q31 (Mus musculus)                 | 350.51  | 10.98 | 46357  | 6  | 1        | 0        | 348069.65 | 3908530.45 | 460602.65 | 4638400.45 | 36763147.25 | 2264737.75 | 438938    | 2792892.25 | 440717    | 0.888 |
| OTTPV4 | Ube2p31 | Ubiquitin-conjugating enzyme E2 Q32 (Mus musculus)                 | 350.51  | 10.98 | 46357  | 6  | 1        | 0        | 348069.65 | 3908530.45 | 460602.65 | 4638400.45 | 36763147.25 | 2264737.75 | 438938    | 2792892.25 | 440717    | 0.888 |
| OTTPV4 | Ube2p32 | Ubiquitin-conjugating enzyme E2 Q33 (Mus musculus)                 | 350.51  | 10.98 | 46357  | 6  | 1        | 0        | 348069.65 | 3908530.45 | 460602.65 | 4638400.45 | 36763147.25 | 2264737.75 | 438938    | 2792892.25 | 440717    | 0.888 |
| OTTPV4 | Ube2p33 | Ubiquitin-conjugating enzyme E2 Q34 (Mus musculus)                 | 350.51  | 10.98 | 46357  | 6  | 1        | 0        | 348069.65 | 3908530.45 | 460602.65 | 4638400.45 | 36763147.25 | 2264737.75 | 438938    | 2792892.25 | 440717    | 0.888 |
| OTTPV4 | Ube2p34 | Ubiquitin-conjugating enzyme E2 Q35 (Mus musculus)                 | 350.51  | 10.98 | 46357  | 6  | 1        | 0        | 348069.65 | 3908530.45 | 460602.65 | 4638400.45 | 36763147.25 | 2264737.75 | 438938    | 2792892.25 | 440717    | 0.888 |
| OTTPV4 | Ube2p35 | Ubiquitin-conjugating enzyme E2 Q36 (Mus musculus)                 | 350.51  | 10.98 | 46357  | 6  | 1        | 0        | 348069.65 | 3908530.45 | 460602.65 | 4638400.45 | 36763147.25 | 2264737.75 | 438938    | 2792892.25 | 440717    | 0.888 |
| OTTPV4 | Ube2p36 | Ubiquitin-conjugating enzyme E2 Q37 (Mus musculus)                 | 350.51  | 10.98 | 46357  | 6  | 1        | 0        | 348069.65 | 3908530.45 | 460602.65 | 4638400.45 | 36763147.25 | 2264737.75 | 438938    | 2792892.25 | 440717    | 0.888 |
| OTTPV4 | Ube2p37 | Ubiquitin-conjugating enzyme E2 Q38 (Mus musculus)                 | 350.51  | 10.98 | 46357  | 6  | 1        | 0        | 348069.65 | 3908530.45 | 460602.65 | 4638400.45 | 36763147.25 | 2264737.75 | 438938    | 2792892.25 | 440717    | 0.888 |
| OTTPV4 | Ube2p38 | Ubiquitin-conjugating enzyme E2 Q39 (Mus musculus)                 | 350.51  | 10.98 | 46357  | 6  | 1        | 0        | 348069.65 | 3908530.45 | 460602.65 | 4638400.45 | 36763147.25 | 2264737.75 | 438938    | 2792892.25 | 440717    | 0.888 |
| OTTPV4 | Ube2p39 | Ubiquitin-conjugating enzyme E2 Q40 (Mus musculus)                 | 350.51  | 10.98 | 46357  | 6  | 1        | 0        | 348069.65 | 3908530.45 | 460602.65 | 4638400.45 | 36763147.25 | 2264737.75 | 438938    | 2792892.25 | 440717    | 0.888 |
| OTTPV4 | Ube2p40 | Ubiquitin-conjugating enzyme E2 Q41 (Mus musculus)                 | 350.51  | 10.98 | 46357  | 6  | 1        | 0        | 348069.65 | 3908530.45 | 460602.65 | 4638400.45 | 36763147.25 | 2264737.75 | 438938    | 2792892.25 | 440717    | 0.888 |
| OTTPV4 | Ube2p41 | Ubiquitin-conjugating enzyme E2 Q42 (Mus musculus)                 | 35      |       |        |    |          |          |           |            |           |            |             |            |           |            |           |       |

|         |        |                                                                                |        |       |         |            |           |            |           |            |            |            |            |            |       |
|---------|--------|--------------------------------------------------------------------------------|--------|-------|---------|------------|-----------|------------|-----------|------------|------------|------------|------------|------------|-------|
| OR8H.5  | Eno2   | Enolfructid and cell motility protein 2 (Mus musculus)                         | 130.18 | 7.38  | 83.87   | 10920.275  | 23.1853   | 257444.25  | 151337.75 | 111964.75  | 971047.19  | 1106150.5  | 896623.19  | 979380.75  | 0.494 |
| OR8H.8  | Pnrl1  | Proteinase inhibitor P13 subunit (Mus musculus)                                | 87.73  | 4.43  | 46.9232 | 66232.805  | 3845476.5 | 7324.682   | 3234.682  | 2607387.75 | 2607387.75 | 2607387.75 | 2607387.75 | 2607387.75 | 1.269 |
| OR8H.9  | Gnab   | Neutral alpha-glucosidase AB (Mus musculus)                                    | 119.52 | 28.92 | 1069.11 | 467979.20  | 57171.904 | 54700000   | 57171.904 | 6258488    | 630079.24  | 6258488    | 6805096    | 6018976.8  | 1.166 |
| OR8H.20 | Fam9a3 | Transport and Golgi organization protein 1 homolog (Mus musculus)              | 202.71 | 14.86 | 37343   | 6829890    | 8070093   | 7393108    | 6130577   | 5626125    | 6897279.5  | 715953.5   | 694478.5   | 7451930    | 0.972 |
| OR8H.7  | Camt1  | Catechol O-methyltransferase domain-containing protein 1 (Mus musculus)        | 86.36  | 1.45  | 21675.5 | 2252324.25 | 180638.75 | 1363883    | 165950.95 | 169562.45  | 1218998    | 1668619    | 792976.5   | 1660776    | 0.891 |
| OR8H.6  | Cacch1 | Catechol O-methyltransferase domain-containing protein 1 (Mus musculus)        | 117.26 | 22.14 | 28961   | 172583.95  | 130409.5  | 1506697    | 1655996   | 138079.38  | 53135.38   | 1661302.25 | 170549.25  | 1182646.75 | 0.885 |
| OR8H.1  | Imr2   | Isolectin-B4 binding protein 2 (Mus musculus)                                  | 62.66  | 16.21 | 112804  | 16682927   | 16236144  | 1606011    | 14689928  | 13941510   | 14251788   | 17466048   | 16578646   | 111        | 1.009 |
| OR8H.7  | Rypl1  | RLK and FYVE domain-containing protein 1 (Mus musculus)                        | 120.72 | 4.35  | 80736   | 3199383.25 | 2863904.5 | 2724651.75 | 20281813  | 1905232.75 | 2426730    | 1846024.5  | 1654439.75 | 1867907.75 | 0.684 |
| OR8H.8  | Pnrl1  | Exopolysphatase Pnrl1 (Mus musculus)                                           | 43.26  | 3.74  | 50239   | 380785.75  | 0         | 219675.47  | 3021813   | 0          | 0          | 0          | 241064.58  | 235609.41  | 0.482 |
| OR8H.4  | Nagpa  | N-acetylglucosamine-1-phosphatase alpha-N-acetylglucosaminidase (Mus musculus) | 262.13 | 8.32  | 56044   | 164260.36  | 172265.66 | 117384.25  | 155787.87 | 1031101.56 | 2218986.25 | 2100252.5  | 1942637.75 | 15         | 1.337 |
| OR8H.5  | Nagpa  | Nuclear pore complex protein Nup93 (Mus musculus)                              | 57.41  | 19.41 | 9381    | 152391.64  | 18462506  | 14927002   | 16740015  | 18074256   | 14147587   | 2060254.5  | 17700806   | 7          | 0.953 |
| OR8H.4  | Smr2   | SN1A domain-containing protein 2 (Mus musculus)                                | 242.12 | 6.7   | 81605   | 664331.64  | 131160.12 | 1251366.12 | 286796.75 | 141081.38  | 77748.25   | 3906234.5  | 367354.1   | 3668767.25 | 1.073 |
| OR8H.6  | Nucl1  | Nucleolar protein 11 (Mus musculus)                                            | 240.1  | 7.61  | 88038   | 424047.5   | 4968399.5 | 4480303    | 4359728   | 418882     | 3977344.5  | 2708284.5  | 3897284.5  | 3668767.25 | 1.000 |
| OR8H.6  | Edn2   | Endocrine transmembrane inhibitor factor 2A (Mus musculus)                     | 284.93 | 32.24 | 64403   | 828427.5   | 4986399.5 | 4480303    | 4359728   | 418882     | 3977344.5  | 2708284.5  | 3897284.5  | 3668767.25 | 1.024 |
| OR8H.1  | Mapk5  | ERK5 protein kinase non-ATPase regulatory subunit 5 (Mus musculus)             | 48.82  | 15.55 | 3552    | 282380     | 4986399.5 | 4480303    | 4359728   | 418882     | 3977344.5  | 2708284.5  | 3897284.5  | 3668767.25 | 1.038 |
| OR8H.5  | Mapk5  | ERK5 protein kinase non-ATPase regulatory subunit 5 (Mus musculus)             | 48.82  | 15.55 | 3552    | 282380     | 4986399.5 | 4480303    | 4359728   | 418882     | 3977344.5  | 2708284.5  | 3897284.5  | 3668767.25 | 1.038 |
| OR8H.5  | Mapk5  | ERK5 protein kinase non-ATPase regulatory subunit 5 (Mus musculus)             | 48.82  | 15.55 | 3552    | 282380     | 4986399.5 | 4480303    | 4359728   | 418882     | 3977344.5  | 2708284.5  | 3897284.5  | 3668767.25 | 1.038 |
| OR8H.5  | Mapk5  | ERK5 protein kinase non-ATPase regulatory subunit 5 (Mus musculus)             | 48.82  | 15.55 | 3552    | 282380     | 4986399.5 | 4480303    | 4359728   | 418882     | 3977344.5  | 2708284.5  | 3897284.5  | 3668767.25 | 1.038 |
| OR8H.5  | Mapk5  | ERK5 protein kinase non-ATPase regulatory subunit 5 (Mus musculus)             | 48.82  | 15.55 | 3552    | 282380     | 4986399.5 | 4480303    | 4359728   | 418882     | 3977344.5  | 2708284.5  | 3897284.5  | 3668767.25 | 1.038 |
| OR8H.5  | Mapk5  | ERK5 protein kinase non-ATPase regulatory subunit 5 (Mus musculus)             | 48.82  | 15.55 | 3552    | 282380     | 4986399.5 | 4480303    | 4359728   | 418882     | 3977344.5  | 2708284.5  | 3897284.5  | 3668767.25 | 1.038 |
| OR8H.5  | Mapk5  | ERK5 protein kinase non-ATPase regulatory subunit 5 (Mus musculus)             | 48.82  | 15.55 | 3552    | 282380     | 4986399.5 | 4480303    | 4359728   | 418882     | 3977344.5  | 2708284.5  | 3897284.5  | 3668767.25 | 1.038 |
| OR8H.5  | Mapk5  | ERK5 protein kinase non-ATPase regulatory subunit 5 (Mus musculus)             | 48.82  | 15.55 | 3552    | 282380     | 4986399.5 | 4480303    | 4359728   | 418882     | 3977344.5  | 2708284.5  | 3897284.5  | 3668767.25 | 1.038 |
| OR8H.5  | Mapk5  | ERK5 protein kinase non-ATPase regulatory subunit 5 (Mus musculus)             | 48.82  | 15.55 | 3552    | 282380     | 4986399.5 | 4480303    | 4359728   | 418882     | 3977344.5  | 2708284.5  | 3897284.5  | 3668767.25 | 1.038 |
| OR8H.5  | Mapk5  | ERK5 protein kinase non-ATPase regulatory subunit 5 (Mus musculus)             | 48.82  | 15.55 | 3552    | 282380     | 4986399.5 | 4480303    | 4359728   | 418882     | 3977344.5  | 2708284.5  | 3897284.5  | 3668767.25 | 1.038 |
| OR8H.5  | Mapk5  | ERK5 protein kinase non-ATPase regulatory subunit 5 (Mus musculus)             | 48.82  | 15.55 | 3552    | 282380     | 4986399.5 | 4480303    | 4359728   | 418882     | 3977344.5  | 2708284.5  | 3897284.5  | 3668767.25 | 1.038 |
| OR8H.5  | Mapk5  | ERK5 protein kinase non-ATPase regulatory subunit 5 (Mus musculus)             | 48.82  | 15.55 | 3552    | 282380     | 4986399.5 | 4480303    | 4359728   | 418882     | 3977344.5  | 2708284.5  | 3897284.5  | 3668767.25 | 1.038 |
| OR8H.5  | Mapk5  | ERK5 protein kinase non-ATPase regulatory subunit 5 (Mus musculus)             | 48.82  | 15.55 | 3552    | 282380     | 4986399.5 | 4480303    | 4359728   | 418882     | 3977344.5  | 2708284.5  | 3897284.5  | 3668767.25 | 1.038 |
| OR8H.5  | Mapk5  | ERK5 protein kinase non-ATPase regulatory subunit 5 (Mus musculus)             | 48.82  | 15.55 | 3552    | 282380     | 4986399.5 | 4480303    | 4359728   | 418882     | 3977344.5  | 2708284.5  | 3897284.5  | 3668767.25 | 1.038 |
| OR8H.5  | Mapk5  | ERK5 protein kinase non-ATPase regulatory subunit 5 (Mus musculus)             | 48.82  | 15.55 | 3552    | 282380     | 4986399.5 | 4480303    | 4359728   | 418882     | 3977344.5  | 2708284.5  | 3897284.5  | 3668767.25 | 1.038 |
| OR8H.5  | Mapk5  | ERK5 protein kinase non-ATPase regulatory subunit 5 (Mus musculus)             | 48.82  | 15.55 | 3552    | 282380     | 4986399.5 | 4480303    | 4359728   | 418882     | 3977344.5  | 2708284.5  | 3897284.5  | 3668767.25 | 1.038 |
| OR8H.5  | Mapk5  | ERK5 protein kinase non-ATPase regulatory subunit 5 (Mus musculus)             | 48.82  | 15.55 | 3552    | 282380     | 4986399.5 | 4480303    | 4359728   | 418882     | 3977344.5  | 2708284.5  | 3897284.5  | 3668767.25 | 1.038 |
| OR8H.5  | Mapk5  | ERK5 protein kinase non-ATPase regulatory subunit 5 (Mus musculus)             | 48.82  | 15.55 | 3552    | 282380     | 4986399.5 | 4480303    | 4359728   | 418882     | 3977344.5  | 2708284.5  | 3897284.5  | 3668767.25 | 1.038 |
| OR8H.5  | Mapk5  | ERK5 protein kinase non-ATPase regulatory subunit 5 (Mus musculus)             | 48.82  | 15.55 | 3552    | 282380     | 4986399.5 | 4480303    | 4359728   | 418882     | 3977344.5  | 2708284.5  | 3897284.5  | 3668767.25 | 1.038 |
| OR8H.5  | Mapk5  | ERK5 protein kinase non-ATPase regulatory subunit 5 (Mus musculus)             | 48.82  | 15.55 | 3552    | 282380     | 4986399.5 | 4480303    | 4359728   | 418882     | 3977344.5  | 2708284.5  | 3897284.5  | 3668767.25 | 1.038 |
| OR8H.5  | Mapk5  | ERK5 protein kinase non-ATPase regulatory subunit 5 (Mus musculus)             | 48.82  | 15.55 | 3552    | 282380     | 4986399.5 | 4480303    | 4359728   | 418882     | 3977344.5  | 2708284.5  | 3897284.5  | 3668767.25 | 1.038 |
| OR8H.5  | Mapk5  | ERK5 protein kinase non-ATPase regulatory subunit 5 (Mus musculus)             | 48.82  | 15.55 | 3552    | 282380     | 4986399.5 | 4480303    | 4359728   | 418882     | 3977344.5  | 2708284.5  | 3897284.5  | 3668767.25 | 1.038 |
| OR8H.5  | Mapk5  | ERK5 protein kinase non-ATPase regulatory subunit 5 (Mus musculus)             | 48.82  | 15.55 | 3552    | 282380     | 4986399.5 | 4480303    | 4359728   | 418882     | 3977344.5  | 2708284.5  | 3897284.5  | 3668767.25 | 1.038 |
| OR8H.5  | Mapk5  | ERK5 protein kinase non-ATPase regulatory subunit 5 (Mus musculus)             | 48.82  | 15.55 | 3552    | 282380     | 4986399.5 | 4480303    | 4359728   | 418882     | 3977344.5  | 2708284.5  | 3897284.5  | 3668767.25 | 1.038 |
| OR8H.5  | Mapk5  | ERK5 protein kinase non-ATPase regulatory subunit 5 (Mus musculus)             | 48.82  | 15.55 | 3552    | 282380     | 4986399.5 | 4480303    | 4359728   | 418882     | 3977344.5  | 2708284.5  | 3897284.5  | 3668767.25 | 1.038 |
| OR8H.5  | Mapk5  | ERK5 protein kinase non-ATPase regulatory subunit 5 (Mus musculus)             | 48.82  | 15.55 | 3552    | 282380     | 4986399.5 | 4480303    | 4359728   | 418882     | 3977344.5  | 2708284.5  | 3897284.5  | 3668767.25 | 1.038 |
| OR8H.5  | Mapk5  | ERK5 protein kinase non-ATPase regulatory subunit 5 (Mus musculus)             | 48.82  | 15.55 | 3552    | 282380     | 4986399.5 | 4480303    | 4359728   | 418882     | 3977344.5  | 2708284.5  | 3897284.5  | 3668767.25 | 1.038 |
| OR8H.5  | Mapk5  | ERK5 protein kinase non-ATPase regulatory subunit 5 (Mus musculus)             | 48.82  | 15.55 | 3552    | 282380     | 4986399.5 | 4480303    | 4359728   | 418882     | 3977344.5  | 2708284.5  | 3897284.5  | 3668767.25 | 1.038 |
| OR8H.5  | Mapk5  | ERK5 protein kinase non-ATPase regulatory subunit 5 (Mus musculus)             | 48.82  | 15.55 | 3552    | 282380     | 4986399.5 | 4480303    | 4359728   | 418882     | 3977344.5  | 2708284.5  | 3897284.5  | 3668767.25 | 1.038 |
| OR8H.5  | Mapk5  | ERK5 protein kinase non-ATPase regulatory subunit 5 (Mus musculus)             | 48.82  | 15.55 | 3552    | 282380     | 4986399.5 | 4480303    | 4359728   | 418882     | 3977344.5  | 2708284.5  | 3897284.5  | 3668767.25 | 1.038 |
| OR8H.5  | Mapk5  | ERK5 protein kinase non-ATPase regulatory subunit 5 (Mus musculus)             | 48.82  | 15.55 | 3552    | 282380     | 4986399.5 | 4480303    | 4359728   | 418882     | 3977344.5  | 2708284.5  | 3897284.5  | 3668767.25 | 1.038 |
| OR8H.5  | Mapk5  | ERK5 protein kinase non-ATPase regulatory subunit 5 (Mus musculus)             | 48.82  | 15.55 | 3552    | 282380     | 4986399.5 | 4480303    | 4359728   | 418882     | 3977344.5  | 2708284.5  | 3897284.5  | 3668767.25 | 1.038 |
| OR8H.5  | Mapk5  | ERK5 protein kinase non-ATPase regulatory subunit 5 (Mus musculus)             | 48.82  | 15.55 | 3552    | 282380     | 4986399.5 | 4480303    | 4359728   | 418882     | 3977344.5  | 2708284.5  | 3897284.5  | 3668767.25 | 1.038 |
| OR8H.5  | Mapk5  | ERK5 protein kinase non-ATPase regulatory subunit 5 (Mus musculus)             | 48.82  | 15.55 | 3552    | 282380     | 4986399.5 | 4480303    | 4359728   | 418882     | 3977344.5  | 2708284.5  | 3897284.5  | 3668767.25 | 1.038 |
| OR8H.5  | Mapk5  | ERK5 protein kinase non-ATPase regulatory subunit 5 (Mus musculus)             | 48.82  | 15.55 | 3552    | 282380     | 4986399.5 | 4480303    | 4359728   | 418882     | 3977344.5  | 2708284.5  | 3897284.5  | 3668767.25 | 1.038 |
| OR8H.5  | Mapk5  | ERK5 protein kinase non-ATPase regulatory subunit 5 (Mus musculus)             | 48.82  | 15.55 | 3552    | 282380     | 4986399.5 | 4480303    | 4359728   | 418882     | 3977344.5  | 2708284.5  | 3897284.5  | 3668767.25 | 1.038 |
| OR8H.5  | Mapk5  | ERK5 protein kinase non-ATPase regulatory subunit 5 (Mus musculus)             | 48.82  | 15.55 | 3552    | 282380     | 4986399.5 | 4480303    | 4359728   | 418882     | 3977344.5  | 2708284.5  | 3897284.5  | 3668767.25 | 1.038 |
| OR8H.5  | Mapk5  | ERK5 protein kinase non-ATPase regulatory subunit 5 (Mus musculus)             | 48.82  | 15.55 | 3552    | 282380     | 4986399.5 | 4480303    | 4359728   | 418882     | 3977344.5  | 2708284.5  | 3897284.5  | 3668767.25 | 1.038 |
| OR8H.5  | Mapk5  | ERK5 protein kinase non-ATPase regulatory subunit 5 (Mus musculus)             | 48.82  | 15.55 | 3552    | 282380     | 4986399.5 | 4480303    | 4359728   | 418882     | 3977344.5  | 2708284.5  | 3897284.5  | 3668767.25 | 1.038 |
| OR8H.5  | Mapk5  | ERK5 protein kinase non-ATPase regulatory subunit 5 (Mus musculus)             | 48.82  | 15.55 | 3552    | 282380     | 4986399.5 | 4480303    | 4359728   | 418882     | 3977344.5  | 2708284.5  | 3897284.5  | 3668767.25 | 1.038 |
| OR8H.5  | Mapk5  | ERK5 protein kinase non-ATPase regulatory subunit 5 (Mus musculus)             | 48.82  | 15.55 | 3552    | 282380     | 4986399.5 | 4480303    | 4359728   | 418882     | 3977344.5  | 2708284.5  | 3897284.5  | 3668767.25 | 1.038 |
| OR8H.5  | Mapk5  | ERK5 protein kinase non-ATPase regulatory subunit 5 (Mus musculus)             | 48.82  | 15.55 | 3552    | 282380     | 4986399.5 | 4480303    | 4359728   | 418882     | 3977344.5  | 2708284.5  | 3897284.5  | 3668767.25 | 1.038 |
| OR8H.5  | Mapk5  | ERK5 protein kinase non-ATPase regulatory subunit 5 (Mus musculus)             | 48.82  | 15.55 | 3552    | 282380     | 4986399.5 | 4480303    | 4359728   | 418882     | 3977344.5  | 2708284.5  | 3897284.5  | 3668767.25 | 1.038 |
| OR8H.5  | Mapk5  | ERK5 protein kinase non-ATPase regulatory subunit 5 (Mus musculus)             | 48.82  | 15.55 | 3552    | 282380     | 4986399.5 | 4480303    | 4359728   | 418882     | 3977344.5  | 2708284.5  | 3897284.5  | 3668767.25 | 1.038 |
| OR8H.5  | Mapk5  | ERK5 protein kinase non-ATPase regulatory subunit 5 (Mus musculus)             | 48.82  | 15.55 | 3552    | 282380     | 4986399.5 | 4480303    | 4359728   | 418882     | 3977344.5  | 2708284.5  | 3897284.5  | 3668767.25 | 1.038 |
| OR8H.5  | Mapk5  | ERK5 protein kinase non-ATPase regulatory subunit 5 (Mus musculus)             | 48.82  | 15.55 | 3552    | 282380     | 4986399.5 | 4480303    | 4359728   | 418882     | 3977344.5  | 2708284.5  | 3897284.5  | 3668767.25 | 1.038 |
| OR8H.5  | Mapk5  | ERK5 protein kinase non-ATPase regulatory subunit 5 (Mus musculus)             | 48.82  | 15.55 | 3552    | 282380     | 4986399.5 | 4480303    | 4359728   | 418882     | 3977344.5  | 2708284.5  | 3897284.5  | 3668767.25 | 1.038 |
| OR      |        |                                                                                |        |       |         |            |           |            |           |            |            |            |            |            |       |

[illegible]



|        |        |        |        |        |        |        |        |        |        |        |        |        |        |        |        |        |        |        |        |        |        |        |        |        |        |        |        |        |        |        |        |        |        |        |        |        |        |        |        |        |        |        |        |        |        |        |        |        |        |        |        |        |        |        |        |        |        |        |        |        |        |        |        |        |        |        |        |        |        |        |        |        |        |        |        |        |        |        |        |        |        |        |        |        |        |        |        |        |        |        |        |        |        |        |        |        |        |        |        |        |        |        |        |        |        |        |        |        |        |        |        |        |        |        |        |        |        |        |        |        |        |        |        |        |        |        |        |        |        |        |        |        |        |        |        |        |        |        |        |        |        |        |        |        |        |        |        |        |        |        |        |        |        |        |        |        |        |        |        |        |        |        |        |        |        |        |        |        |        |        |        |        |        |        |        |        |        |        |        |        |        |        |        |        |        |        |        |        |        |        |        |        |        |        |        |        |        |        |        |        |        |        |        |        |        |        |        |        |        |        |        |        |        |        |        |        |        |        |        |        |        |        |        |        |        |        |        |        |        |        |        |        |        |        |        |        |        |        |        |        |        |        |        |        |        |        |        |        |        |        |        |        |        |        |        |        |        |        |        |        |        |        |        |        |        |        |        |        |        |        |        |        |        |        |        |        |        |        |        |        |        |        |        |        |        |        |        |        |        |        |        |        |        |        |        |        |        |        |        |        |        |        |        |        |        |        |        |        |        |        |        |        |        |        |        |        |        |        |        |        |        |        |        |        |        |        |        |        |        |        |        |        |        |        |        |        |        |        |        |        |        |        |        |        |        |        |        |        |        |        |        |        |        |        |        |        |        |        |        |        |        |        |        |        |        |        |        |        |        |        |        |        |        |        |        |        |        |        |        |        |        |        |        |        |        |        |        |        |        |        |        |        |        |        |        |        |        |        |        |        |        |        |        |        |        |        |        |        |  |
|--------|--------|--------|--------|--------|--------|--------|--------|--------|--------|--------|--------|--------|--------|--------|--------|--------|--------|--------|--------|--------|--------|--------|--------|--------|--------|--------|--------|--------|--------|--------|--------|--------|--------|--------|--------|--------|--------|--------|--------|--------|--------|--------|--------|--------|--------|--------|--------|--------|--------|--------|--------|--------|--------|--------|--------|--------|--------|--------|--------|--------|--------|--------|--------|--------|--------|--------|--------|--------|--------|--------|--------|--------|--------|--------|--------|--------|--------|--------|--------|--------|--------|--------|--------|--------|--------|--------|--------|--------|--------|--------|--------|--------|--------|--------|--------|--------|--------|--------|--------|--------|--------|--------|--------|--------|--------|--------|--------|--------|--------|--------|--------|--------|--------|--------|--------|--------|--------|--------|--------|--------|--------|--------|--------|--------|--------|--------|--------|--------|--------|--------|--------|--------|--------|--------|--------|--------|--------|--------|--------|--------|--------|--------|--------|--------|--------|--------|--------|--------|--------|--------|--------|--------|--------|--------|--------|--------|--------|--------|--------|--------|--------|--------|--------|--------|--------|--------|--------|--------|--------|--------|--------|--------|--------|--------|--------|--------|--------|--------|--------|--------|--------|--------|--------|--------|--------|--------|--------|--------|--------|--------|--------|--------|--------|--------|--------|--------|--------|--------|--------|--------|--------|--------|--------|--------|--------|--------|--------|--------|--------|--------|--------|--------|--------|--------|--------|--------|--------|--------|--------|--------|--------|--------|--------|--------|--------|--------|--------|--------|--------|--------|--------|--------|--------|--------|--------|--------|--------|--------|--------|--------|--------|--------|--------|--------|--------|--------|--------|--------|--------|--------|--------|--------|--------|--------|--------|--------|--------|--------|--------|--------|--------|--------|--------|--------|--------|--------|--------|--------|--------|--------|--------|--------|--------|--------|--------|--------|--------|--------|--------|--------|--------|--------|--------|--------|--------|--------|--------|--------|--------|--------|--------|--------|--------|--------|--------|--------|--------|--------|--------|--------|--------|--------|--------|--------|--------|--------|--------|--------|--------|--------|--------|--------|--------|--------|--------|--------|--------|--------|--------|--------|--------|--------|--------|--------|--------|--------|--------|--------|--------|--------|--------|--------|--------|--------|--------|--------|--------|--------|--------|--------|--------|--------|--------|--------|--------|--------|--------|--------|--------|--------|--------|--------|--------|--------|--------|--------|--------|--------|--------|--------|--------|--------|--------|--------|--------|--------|--------|--------|--------|--------|--------|--------|--------|--------|--------|--------|--------|--------|--------|--------|--------|--------|--------|--------|--------|--------|--------|--------|--------|--------|--------|--------|--------|--------|--------|--------|--------|--------|--------|--------|--------|--------|--------|--------|--------|--------|--------|--------|--|
| OR8307 | OR8308 | OR8309 | OR8310 | OR8311 | OR8312 | OR8313 | OR8314 | OR8315 | OR8316 | OR8317 | OR8318 | OR8319 | OR8320 | OR8321 | OR8322 | OR8323 | OR8324 | OR8325 | OR8326 | OR8327 | OR8328 | OR8329 | OR8330 | OR8331 | OR8332 | OR8333 | OR8334 | OR8335 | OR8336 | OR8337 | OR8338 | OR8339 | OR8340 | OR8341 | OR8342 | OR8343 | OR8344 | OR8345 | OR8346 | OR8347 | OR8348 | OR8349 | OR8350 | OR8351 | OR8352 | OR8353 | OR8354 | OR8355 | OR8356 | OR8357 | OR8358 | OR8359 | OR8360 | OR8361 | OR8362 | OR8363 | OR8364 | OR8365 | OR8366 | OR8367 | OR8368 | OR8369 | OR8370 | OR8371 | OR8372 | OR8373 | OR8374 | OR8375 | OR8376 | OR8377 | OR8378 | OR8379 | OR8380 | OR8381 | OR8382 | OR8383 | OR8384 | OR8385 | OR8386 | OR8387 | OR8388 | OR8389 | OR8390 | OR8391 | OR8392 | OR8393 | OR8394 | OR8395 | OR8396 | OR8397 | OR8398 | OR8399 | OR8400 | OR8401 | OR8402 | OR8403 | OR8404 | OR8405 | OR8406 | OR8407 | OR8408 | OR8409 | OR8410 | OR8411 | OR8412 | OR8413 | OR8414 | OR8415 | OR8416 | OR8417 | OR8418 | OR8419 | OR8420 | OR8421 | OR8422 | OR8423 | OR8424 | OR8425 | OR8426 | OR8427 | OR8428 | OR8429 | OR8430 | OR8431 | OR8432 | OR8433 | OR8434 | OR8435 | OR8436 | OR8437 | OR8438 | OR8439 | OR8440 | OR8441 | OR8442 | OR8443 | OR8444 | OR8445 | OR8446 | OR8447 | OR8448 | OR8449 | OR8450 | OR8451 | OR8452 | OR8453 | OR8454 | OR8455 | OR8456 | OR8457 | OR8458 | OR8459 | OR8460 | OR8461 | OR8462 | OR8463 | OR8464 | OR8465 | OR8466 | OR8467 | OR8468 | OR8469 | OR8470 | OR8471 | OR8472 | OR8473 | OR8474 | OR8475 | OR8476 | OR8477 | OR8478 | OR8479 | OR8480 | OR8481 | OR8482 | OR8483 | OR8484 | OR8485 | OR8486 | OR8487 | OR8488 | OR8489 | OR8490 | OR8491 | OR8492 | OR8493 | OR8494 | OR8495 | OR8496 | OR8497 | OR8498 | OR8499 | OR8500 | OR8501 | OR8502 | OR8503 | OR8504 | OR8505 | OR8506 | OR8507 | OR8508 | OR8509 | OR8510 | OR8511 | OR8512 | OR8513 | OR8514 | OR8515 | OR8516 | OR8517 | OR8518 | OR8519 | OR8520 | OR8521 | OR8522 | OR8523 | OR8524 | OR8525 | OR8526 | OR8527 | OR8528 | OR8529 | OR8530 | OR8531 | OR8532 | OR8533 | OR8534 | OR8535 | OR8536 | OR8537 | OR8538 | OR8539 | OR8540 | OR8541 | OR8542 | OR8543 | OR8544 | OR8545 | OR8546 | OR8547 | OR8548 | OR8549 | OR8550 | OR8551 | OR8552 | OR8553 | OR8554 | OR8555 | OR8556 | OR8557 | OR8558 | OR8559 | OR8560 | OR8561 | OR8562 | OR8563 | OR8564 | OR8565 | OR8566 | OR8567 | OR8568 | OR8569 | OR8570 | OR8571 | OR8572 | OR8573 | OR8574 | OR8575 | OR8576 | OR8577 | OR8578 | OR8579 | OR8580 | OR8581 | OR8582 | OR8583 | OR8584 | OR8585 | OR8586 | OR8587 | OR8588 | OR8589 | OR8590 | OR8591 | OR8592 | OR8593 | OR8594 | OR8595 | OR8596 | OR8597 | OR8598 | OR8599 | OR8600 | OR8601 | OR8602 | OR8603 | OR8604 | OR8605 | OR8606 | OR8607 | OR8608 | OR8609 | OR8610 | OR8611 | OR8612 | OR8613 | OR8614 | OR8615 | OR8616 | OR8617 | OR8618 | OR8619 | OR8620 | OR8621 | OR8622 | OR8623 | OR8624 | OR8625 | OR8626 | OR8627 | OR8628 | OR8629 | OR8630 | OR8631 | OR8632 | OR8633 | OR8634 | OR8635 | OR8636 | OR8637 | OR8638 | OR8639 | OR8640 | OR8641 | OR8642 | OR8643 | OR8644 | OR8645 | OR8646 | OR8647 | OR8648 | OR8649 | OR8650 | OR8651 | OR8652 | OR8653 | OR8654 | OR8655 | OR8656 | OR8657 | OR8658 | OR8659 | OR8660 | OR8661 | OR8662 | OR8663 | OR8664 | OR8665 | OR8666 | OR8667 | OR8668 | OR8669 | OR8670 | OR8671 | OR8672 | OR8673 | OR8674 | OR8675 | OR8676 | OR8677 | OR8678 | OR8679 | OR8680 | OR8681 | OR8682 | OR8683 | OR8684 | OR8685 | OR8686 | OR8687 | OR8688 | OR8689 | OR8690 | OR8691 | OR8692 | OR8693 | OR8694 | OR8695 | OR8696 | OR8697 | OR8698 | OR8699 | OR8700 | OR8701 | OR8702 | OR8703 | OR8704 | OR8705 | OR8706 | OR8707 | OR8708 | OR8709 | OR8710 | OR8711 | OR8712 | OR8713 | OR8714 | OR8715 |  |
|--------|--------|--------|--------|--------|--------|--------|--------|--------|--------|--------|--------|--------|--------|--------|--------|--------|--------|--------|--------|--------|--------|--------|--------|--------|--------|--------|--------|--------|--------|--------|--------|--------|--------|--------|--------|--------|--------|--------|--------|--------|--------|--------|--------|--------|--------|--------|--------|--------|--------|--------|--------|--------|--------|--------|--------|--------|--------|--------|--------|--------|--------|--------|--------|--------|--------|--------|--------|--------|--------|--------|--------|--------|--------|--------|--------|--------|--------|--------|--------|--------|--------|--------|--------|--------|--------|--------|--------|--------|--------|--------|--------|--------|--------|--------|--------|--------|--------|--------|--------|--------|--------|--------|--------|--------|--------|--------|--------|--------|--------|--------|--------|--------|--------|--------|--------|--------|--------|--------|--------|--------|--------|--------|--------|--------|--------|--------|--------|--------|--------|--------|--------|--------|--------|--------|--------|--------|--------|--------|--------|--------|--------|--------|--------|--------|--------|--------|--------|--------|--------|--------|--------|--------|--------|--------|--------|--------|--------|--------|--------|--------|--------|--------|--------|--------|--------|--------|--------|--------|--------|--------|--------|--------|--------|--------|--------|--------|--------|--------|--------|--------|--------|--------|--------|--------|--------|--------|--------|--------|--------|--------|--------|--------|--------|--------|--------|--------|--------|--------|--------|--------|--------|--------|--------|--------|--------|--------|--------|--------|--------|--------|--------|--------|--------|--------|--------|--------|--------|--------|--------|--------|--------|--------|--------|--------|--------|--------|--------|--------|--------|--------|--------|--------|--------|--------|--------|--------|--------|--------|--------|--------|--------|--------|--------|--------|--------|--------|--------|--------|--------|--------|--------|--------|--------|--------|--------|--------|--------|--------|--------|--------|--------|--------|--------|--------|--------|--------|--------|--------|--------|--------|--------|--------|--------|--------|--------|--------|--------|--------|--------|--------|--------|--------|--------|--------|--------|--------|--------|--------|--------|--------|--------|--------|--------|--------|--------|--------|--------|--------|--------|--------|--------|--------|--------|--------|--------|--------|--------|--------|--------|--------|--------|--------|--------|--------|--------|--------|--------|--------|--------|--------|--------|--------|--------|--------|--------|--------|--------|--------|--------|--------|--------|--------|--------|--------|--------|--------|--------|--------|--------|--------|--------|--------|--------|--------|--------|--------|--------|--------|--------|--------|--------|--------|--------|--------|--------|--------|--------|--------|--------|--------|--------|--------|--------|--------|--------|--------|--------|--------|--------|--------|--------|--------|--------|--------|--------|--------|--------|--------|--------|--------|--------|--------|--------|--------|--------|--------|--------|--------|--------|--------|--------|--------|--------|--------|--------|--------|--------|--------|--------|--------|--------|--------|--------|--------|--------|--------|--------|--------|--|

|        |         |                                                                                    |         |       |        |            |            |            |            |            |            |            |            |           |        |
|--------|---------|------------------------------------------------------------------------------------|---------|-------|--------|------------|------------|------------|------------|------------|------------|------------|------------|-----------|--------|
| 091Y10 | Enke    | Protein FAMC (Mus musculus)                                                        | 173.43  | 19.82 | 24753  | 1199581.75 | 237196.23  | 1109697.75 | 246269.16  | 55485.88   | 1443253    | 1079771    | 1239574.88 | 99259.19  | 11.194 |
| 091Y17 | Protein | Protein                                                                            | 109.16  | 4.39  | 740793 | 1290966.62 | 690016.66  | 1043726.19 | 627189.9   | 127360.5   | 1353923    | 1438311.38 | 1270262.62 | 690380.8  | 1.654  |
| 091Y17 | Slp3b3  | SH3 domain-binding protein 3 (Mus musculus) 3                                      | 154.55  | 66.67 | 100477 | 8484669    | 423231.99  | 0          | 627189.9   | 658599.15  | 808837.5   | 654286.8   | 7218815    | 1218815   | 1.191  |
| 091Y26 | Znf622  | Zinc finger protein 622 (Mus musculus)                                             | 46.65   | 5.46  | 53451  | 0          | 0          | 901629.75  | 1401353.12 | 0          | 0          | 1447207    | 0          | 0         | 0.454  |
| 091Y26 | Smag1   | Stronal membrane-associated protein 1 (Mus musculus)                               | 112.16  | 2.73  | 47660  | 0          | 0          | 0          | 992072.12  | 921802.44  | 0          | 89386.25   | 732342.94  | 787309.75 | 1.183  |
| 091Y60 | Cad1    | Calcium stock domain-containing protein 1 (Mus musculus)                           | 19.01   | 2.81  | 88791  | 34736200   | 46295720   | 40909868   | 702580.62  | 1484345    | 1441747.75 | 1385641.9  | 4903449.2  | 4262591.6 | 1.2    |
| 091W80 | Mand1   | Alpha-mannosidase 2C1 (Mus musculus)                                               | 188.13  | 3.95  | 115688 | 1221183    | 904947.44  | 628384.19  | 10873278   | 853949.5   | 8738028    | 3967980.5  | 929230.25  | 1451591.6 | 0.989  |
| 091W90 | Tand5   | Threonine domain-containing protein 5 (Mus musculus)                               | 410.23  | 21.1  | 16415  | 10548319   | 10269400   | 10313904   | 6018436    | 3967980.5  | 8738028    | 3967980.5  | 929230.25  | 1451591.6 | 0.730  |
| 091W97 | Hdck1   | Putative hexokinase HKDC1 (Mus musculus)                                           | 193.9   | 2.95  | 102359 | 19943890   | 1666797    | 18186238   | 15253592   | 21351074   | 19592522   | 19404073   | 88203394   | 19232534  | 4      |
| 091W05 | Scd4    | Histone lysine N-methyltransferase scd4 (Mus musculus)                             | 93.37   | 6.23  | 67176  | 696457.45  | 1189170.75 | 847493.69  | 707939.25  | 707939.25  | 686083.68  | 8959234.8  | 57934.88   | 57934.88  | 0.796  |
| 091W05 | Nufic2  | NAHD dehydrogenase (ubiquinol) iron sulfur protein 2, mitochondrial (Mus musculus) | 168.73  | 9.5   | 52526  | 519535.45  | 4320866    | 2608935    | 319397.25  | 3604237.25 | 3604237.25 | 3247268.5  | 317073     | 2646649   | 10     |
| 091W02 | Fm12a   | PSME3-interacting protein (Mus musculus)                                           | 63.82   | 5.51  | 28702  | 1190811.88 | 6234930    | 8683536    | 5910485    | 1879169.5  | 7670096    | 6760993    | 697409.5   | 7812572   | 5      |
| 091W02 | Fm12b   | PSME3-interacting protein (Mus musculus)                                           | 62.88   | 44.32 | 39832  | 1190811.88 | 6234930    | 8683536    | 5910485    | 1879169.5  | 7670096    | 6760993    | 697409.5   | 7812572   | 5      |
| 091W03 | Yars    | U3 small nuclear RNA-interacting protein H (Mus musculus)                          | 67.34   | 3.79  | 52107  | 335028.25  | 46069066   | 594961.62  | 841782.1   | 10331937   | 15186834   | 975554.81  | 61879649   | 83601.06  | 4      |
| 091W03 | Yars    | U3 small nuclear RNA-interacting protein H (Mus musculus)                          | 67.34   | 3.79  | 52107  | 335028.25  | 46069066   | 594961.62  | 841782.1   | 10331937   | 15186834   | 975554.81  | 61879649   | 83601.06  | 4      |
| 091W03 | Yars    | U3 small nuclear RNA-interacting protein H (Mus musculus)                          | 67.34   | 3.79  | 52107  | 335028.25  | 46069066   | 594961.62  | 841782.1   | 10331937   | 15186834   | 975554.81  | 61879649   | 83601.06  | 4      |
| 091W03 | Yars    | U3 small nuclear RNA-interacting protein H (Mus musculus)                          | 67.34   | 3.79  | 52107  | 335028.25  | 46069066   | 594961.62  | 841782.1   | 10331937   | 15186834   | 975554.81  | 61879649   | 83601.06  | 4      |
| 091W03 | Yars    | U3 small nuclear RNA-interacting protein H (Mus musculus)                          | 67.34   | 3.79  | 52107  | 335028.25  | 46069066   | 594961.62  | 841782.1   | 10331937   | 15186834   | 975554.81  | 61879649   | 83601.06  | 4      |
| 091W03 | Yars    | U3 small nuclear RNA-interacting protein H (Mus musculus)                          | 67.34   | 3.79  | 52107  | 335028.25  | 46069066   | 594961.62  | 841782.1   | 10331937   | 15186834   | 975554.81  | 61879649   | 83601.06  | 4      |
| 091W03 | Yars    | U3 small nuclear RNA-interacting protein H (Mus musculus)                          | 67.34   | 3.79  | 52107  | 335028.25  | 46069066   | 594961.62  | 841782.1   | 10331937   | 15186834   | 975554.81  | 61879649   | 83601.06  | 4      |
| 091W03 | Yars    | U3 small nuclear RNA-interacting protein H (Mus musculus)                          | 67.34   | 3.79  | 52107  | 335028.25  | 46069066   | 594961.62  | 841782.1   | 10331937   | 15186834   | 975554.81  | 61879649   | 83601.06  | 4      |
| 091W03 | Yars    | U3 small nuclear RNA-interacting protein H (Mus musculus)                          | 67.34   | 3.79  | 52107  | 335028.25  | 46069066   | 594961.62  | 841782.1   | 10331937   | 15186834   | 975554.81  | 61879649   | 83601.06  | 4      |
| 091W03 | Yars    | U3 small nuclear RNA-interacting protein H (Mus musculus)                          | 67.34   | 3.79  | 52107  | 335028.25  | 46069066   | 594961.62  | 841782.1   | 10331937   | 15186834   | 975554.81  | 61879649   | 83601.06  | 4      |
| 091W03 | Yars    | U3 small nuclear RNA-interacting protein H (Mus musculus)                          | 67.34   | 3.79  | 52107  | 335028.25  | 46069066   | 594961.62  | 841782.1   | 10331937   | 15186834   | 975554.81  | 61879649   | 83601.06  | 4      |
| 091W03 | Yars    | U3 small nuclear RNA-interacting protein H (Mus musculus)                          | 67.34   | 3.79  | 52107  | 335028.25  | 46069066   | 594961.62  | 841782.1   | 10331937   | 15186834   | 975554.81  | 61879649   | 83601.06  | 4      |
| 091W03 | Yars    | U3 small nuclear RNA-interacting protein H (Mus musculus)                          | 67.34   | 3.79  | 52107  | 335028.25  | 46069066   | 594961.62  | 841782.1   | 10331937   | 15186834   | 975554.81  | 61879649   | 83601.06  | 4      |
| 091W03 | Yars    | U3 small nuclear RNA-interacting protein H (Mus musculus)                          | 67.34   | 3.79  | 52107  | 335028.25  | 46069066   | 594961.62  | 841782.1   | 10331937   | 15186834   | 975554.81  | 61879649   | 83601.06  | 4      |
| 091W03 | Yars    | U3 small nuclear RNA-interacting protein H (Mus musculus)                          | 67.34   | 3.79  | 52107  | 335028.25  | 46069066   | 594961.62  | 841782.1   | 10331937   | 15186834   | 975554.81  | 61879649   | 83601.06  | 4      |
| 091W03 | Yars    | U3 small nuclear RNA-interacting protein H (Mus musculus)                          | 67.34   | 3.79  | 52107  | 335028.25  | 46069066   | 594961.62  | 841782.1   | 10331937   | 15186834   | 975554.81  | 61879649   | 83601.06  | 4      |
| 091W03 | Yars    | U3 small nuclear RNA-interacting protein H (Mus musculus)                          | 67.34   | 3.79  | 52107  | 335028.25  | 46069066   | 594961.62  | 841782.1   | 10331937   | 15186834   | 975554.81  | 61879649   | 83601.06  | 4      |
| 091W03 | Yars    | U3 small nuclear RNA-interacting protein H (Mus musculus)                          | 67.34   | 3.79  | 52107  | 335028.25  | 46069066   | 594961.62  | 841782.1   | 10331937   | 15186834   | 975554.81  | 61879649   | 83601.06  | 4      |
| 091W03 | Yars    | U3 small nuclear RNA-interacting protein H (Mus musculus)                          | 67.34   | 3.79  | 52107  | 335028.25  | 46069066   | 594961.62  | 841782.1   | 10331937   | 15186834   | 975554.81  | 61879649   | 83601.06  | 4      |
| 091W03 | Yars    | U3 small nuclear RNA-interacting protein H (Mus musculus)                          | 67.34   | 3.79  | 52107  | 335028.25  | 46069066   | 594961.62  | 841782.1   | 10331937   | 15186834   | 975554.81  | 61879649   | 83601.06  | 4      |
| 091W03 | Yars    | U3 small nuclear RNA-interacting protein H (Mus musculus)                          | 67.34   | 3.79  | 52107  | 335028.25  | 46069066   | 594961.62  | 841782.1   | 10331937   | 15186834   | 975554.81  | 61879649   | 83601.06  | 4      |
| 091W03 | Yars    | U3 small nuclear RNA-interacting protein H (Mus musculus)                          | 67.34   | 3.79  | 52107  | 335028.25  | 46069066   | 594961.62  | 841782.1   | 10331937   | 15186834   | 975554.81  | 61879649   | 83601.06  | 4      |
| 091W03 | Yars    | U3 small nuclear RNA-interacting protein H (Mus musculus)                          | 67.34   | 3.79  | 52107  | 335028.25  | 46069066   | 594961.62  | 841782.1   | 10331937   | 15186834   | 975554.81  | 61879649   | 83601.06  | 4      |
| 091W03 | Yars    | U3 small nuclear RNA-interacting protein H (Mus musculus)                          | 67.34   | 3.79  | 52107  | 335028.25  | 46069066   | 594961.62  | 841782.1   | 10331937   | 15186834   | 975554.81  | 61879649   | 83601.06  | 4      |
| 091W03 | Yars    | U3 small nuclear RNA-interacting protein H (Mus musculus)                          | 67.34   | 3.79  | 52107  | 335028.25  | 46069066   | 594961.62  | 841782.1   | 10331937   | 15186834   | 975554.81  | 61879649   | 83601.06  | 4      |
| 091W03 | Yars    | U3 small nuclear RNA-interacting protein H (Mus musculus)                          | 67.34   | 3.79  | 52107  | 335028.25  | 46069066   | 594961.62  | 841782.1   | 10331937   | 15186834   | 975554.81  | 61879649   | 83601.06  | 4      |
| 091W03 | Yars    | U3 small nuclear RNA-interacting protein H (Mus musculus)                          | 67.34   | 3.79  | 52107  | 335028.25  | 46069066   | 594961.62  | 841782.1   | 10331937   | 15186834   | 975554.81  | 61879649   | 83601.06  | 4      |
| 091W03 | Yars    | U3 small nuclear RNA-interacting protein H (Mus musculus)                          | 67.34   | 3.79  | 52107  | 335028.25  | 46069066   | 594961.62  | 841782.1   | 10331937   | 15186834   | 975554.81  | 61879649   | 83601.06  | 4      |
| 091W03 | Yars    | U3 small nuclear RNA-interacting protein H (Mus musculus)                          | 67.34   | 3.79  | 52107  | 335028.25  | 46069066   | 594961.62  | 841782.1   | 10331937   | 15186834   | 975554.81  | 61879649   | 83601.06  | 4      |
| 091W03 | Yars    | U3 small nuclear RNA-interacting protein H (Mus musculus)                          | 67.34   | 3.79  | 52107  | 335028.25  | 46069066   | 594961.62  | 841782.1   | 10331937   | 15186834   | 975554.81  | 61879649   | 83601.06  | 4      |
| 091W03 | Yars    | U3 small nuclear RNA-interacting protein H (Mus musculus)                          | 67.34   | 3.79  | 52107  | 335028.25  | 46069066   | 594961.62  | 841782.1   | 10331937   | 15186834   | 975554.81  | 61879649   | 83601.06  | 4      |
| 091W03 | Yars    | U3 small nuclear RNA-interacting protein H (Mus musculus)                          | 67.34   | 3.79  | 52107  | 335028.25  | 46069066   | 594961.62  | 841782.1   | 10331937   | 15186834   | 975554.81  | 61879649   | 83601.06  | 4      |
| 091W03 | Yars    | U3 small nuclear RNA-interacting protein H (Mus musculus)                          | 67.34   | 3.79  | 52107  | 335028.25  | 46069066   | 594961.62  | 841782.1   | 10331937   | 15186834   | 975554.81  | 61879649   | 83601.06  | 4      |
| 091W03 | Yars    | U3 small nuclear RNA-interacting protein H (Mus musculus)                          | 67.34   | 3.79  | 52107  | 335028.25  | 46069066   | 594961.62  | 841782.1   | 10331937   | 15186834   | 975554.81  | 61879649   | 83601.06  | 4      |
| 091W03 | Yars    | U3 small nuclear RNA-interacting protein H (Mus musculus)                          | 67.34   | 3.79  | 52107  | 335028.25  | 46069066   | 594961.62  | 841782.1   | 10331937   | 15186834   | 975554.81  | 61879649   | 83601.06  | 4      |
| 091W03 | Yars    | U3 small nuclear RNA-interacting protein H (Mus musculus)                          | 67.34   | 3.79  | 52107  | 335028.25  | 46069066   | 594961.62  | 841782.1   | 10331937   | 15186834   | 975554.81  | 61879649   | 83601.06  | 4      |
| 091W03 | Yars    | U3 small nuclear RNA-interacting protein H (Mus musculus)                          | 67.34   | 3.79  | 52107  | 335028.25  | 46069066   | 594961.62  | 841782.1   | 10331937   | 15186834   | 975554.81  | 61879649   | 83601.06  | 4      |
| 091W03 | Yars    | U3 small nuclear RNA-interacting protein H (Mus musculus)                          | 67.34   | 3.79  | 52107  | 335028.25  | 46069066   | 594961.62  | 841782.1   | 10331937   | 15186834   | 975554.81  | 61879649   | 83601.06  | 4      |
| 091W03 | Yars    | U3 small nuclear RNA-interacting protein H (Mus musculus)                          | 67.34   | 3.79  | 52107  | 335028.25  | 46069066   | 594961.62  | 841782.1   | 10331937   | 15186834   | 975554.81  | 61879649   | 83601.06  | 4      |
| 091W03 | Yars    | U3 small nuclear RNA-interacting protein H (Mus musculus)                          | 67.34   | 3.79  | 52107  | 335028.25  | 46069066   | 594961.62  | 841782.1   | 10331937   | 15186834   | 975554.81  | 61879649   | 83601.06  | 4      |
| 091W03 | Yars    | U3 small nuclear RNA-interacting protein H (Mus musculus)                          | 67.34   | 3.79  | 52107  | 335028.25  | 46069066   | 594961.62  | 841782.1   | 10331937   | 15186834   | 975554.81  | 61879649   | 83601.06  | 4      |
| 091W03 | Yars    | U3 small nuclear RNA-interacting protein H (Mus musculus)                          | 67.34   | 3.79  | 52107  | 335028.25  | 46069066   | 594961.62  | 841782.1   | 10331937   | 15186834   | 975554.81  | 61879649   | 83601.06  | 4      |
| 091W03 | Yars    | U3 small nuclear RNA-interacting protein H (Mus musculus)                          | 67.34   | 3.79  | 52107  | 335028.25  | 46069066   | 594961.62  | 841782.1   | 10331937   | 15186834   | 975554.81  | 61879649   | 83601.06  | 4      |
| 091W03 | Yars    | U3 small nuclear RNA-interacting protein H (Mus musculus)                          | 67.34   | 3.79  | 52107  | 335028.25  | 46069066   | 594961.62  | 841782.1   | 10331937   | 15186834   | 975554.81  | 61879649   | 83601.06  | 4      |
| 091W03 | Yars    | U3 small nuclear RNA-interacting protein H (Mus musculus)                          | 67.34   | 3.79  | 52107  | 335028.25  | 46069066   | 594961.62  | 841782.1   | 10331937   | 15186834   | 975554.81  | 61879649   | 83601.06  | 4      |
| 091W03 | Yars    | U3 small nuclear RNA-interacting protein H (Mus musculus)                          | 67.34   | 3.79  | 52107  | 335028.25  | 46069066   | 594961.62  | 841782.1   | 10331937   | 15186834   | 975554.81  | 61879649   | 83601.06  | 4      |
| 091W03 | Yars    | U3 small nuclear RNA-interacting protein H (Mus musculus)                          | 67.34   | 3.79  | 52107  | 335028.25  | 46069066   | 594961.62  | 841782.1   | 10331937   | 15186834   | 975554.81  | 61879649   | 83601.06  | 4      |
| 091W03 | Yars    | U3 small nuclear RNA-interacting protein H (Mus musculus)                          | 67.34   | 3.79  | 52107  | 335028.25  | 46069066   | 594961.62  | 841782.1   | 10331937   | 15186834   | 975554.81  | 61879649   | 83601.06  | 4      |
| 091W03 | Yars    | U3 small nuclear RNA-interacting protein H (Mus musculus)                          | 67.34   | 3.79  | 52107  | 335028.25  | 46069066   | 594961.62  | 841782.1   | 10331937   | 15186834   | 975554.81  | 61879649   | 83601.06  | 4      |
| 091W03 | Yars    | U3 small nuclear RNA-interacting protein H (Mus musculus)                          | 67.34   | 3.79  | 52107  | 335028.25  | 46069066   | 594961.62  | 841782.1   | 10331937   | 15186834   | 975554.81  | 61879649   | 83601.06  | 4      |
| 091W03 | Yars    | U3 small nuclear RNA-interacting protein H (Mus musculus)                          | 67.34</ |       |        |            |            |            |            |            |            |            |            |           |        |

|        |         |                                                               |         |       |        |            |           |            |            |           |            |           |            |            |       |
|--------|---------|---------------------------------------------------------------|---------|-------|--------|------------|-----------|------------|------------|-----------|------------|-----------|------------|------------|-------|
| Q91092 | Taf12d  | Transluciferase (Mus musculus)                                | 171.372 | 37.87 | 64.99  | 37.87      | 590571720 | 667357804  | 668817920  | 644372616 | 647974900  | 653440928 | 618319424  | 658216128  | 1.094 |
| Q99020 | Hmgb8   | Heterogeneous nuclear ribonucleoprotein A/B (Mus musculus)    | 113.87  | 23.16 | 30.81  | 19523304   | 26113080  | 19933304   | 18583800   | 1543114   | 18583800   | 18195396  | 18840018   | 18880910   | 1.841 |
| Q99104 | MeCP2   | Unconventional myosin Va (Mus musculus)                       | 114.31  | 1.73  | 215358 | 2662629    | 2586356   | 2748745    | 220641072  | 2299732   | 22535934   | 833274.12 | 700667.75  | 703620.52  | 1.435 |
| Q99099 | Wdr77   | Methyltransferase domain-containing protein 50 (Mus musculus) | 100.68  | 4.97  | 36043  | 1972678.12 | 234507.84 | 1901881    | 2640045.75 | 666530.44 | 1833114.88 | 160029658 | 1671994.88 | 1499994.38 | 1.627 |
| Q99123 | Gcle    | GCH1 domain-containing protein (Mus musculus)                 | 77.02   | 2.44  | 58808  | 319524.88  | 50182.22  | 831566.61  | 277466.94  | 173808.38 | 183474.61  | 205153.56 | 264577.58  | 223810.52  | 1.0   |
| Q99166 | Thumpp1 | THUMP domain-containing protein 1 (Mus musculus)              | 50.3    | 3.14  | 38885  | 663170.28  | 514145.53 | 13472.88   | 0          | 173808.38 | 183474.61  | 205153.56 | 264577.58  | 223810.52  | 1.0   |
| Q99162 | Rck     | Replication factor C subunit 4 (Mus musculus)                 | 150.55  | 7.69  | 39867  | 90723272   | 2216625.5 | 1583544.88 | 3489856.5  | 2983161.5 | 277182.4   | 589077.69 | 474715.69  | 747135.69  | 1.792 |
| Q99177 | Nrns    | Stable acid synthase (Mus musculus)                           | 379.33  | 28.13 | 40024  | 3191412.35 | 2919733.5 | 1103535.99 | 10504601   | 9791452   | 9484233    | 103630.60 | 80325880   | 912874.5   | 0.961 |
| Q99193 | Ilim2   | Interferon-induced transmembrane protein 2 (Mus musculus)     | 151.94  | 16.67 | 38835  | 13182844   | 13989997  | 13986901   | 14671817   | 12091408  | 31596462   | 26939264  | 23615622   | 912874.5   | 1.356 |
| Q99182 | Sncd2   | Somatomedin-like protein 2, microthorial (Mus musculus)       | 38.23   | 25.21 | 38383  | 629250.5   | 740023.8  | 4854161    | 7400047.5  | 664072.4  | 6776401    | 6676401   | 7444212.5  | 6638109    | 1.124 |
| Q99178 | Pap1    | PCNA and SRSF1 interacting protein (Mus musculus)             | 255.63  | 10.98 | 59097  | 7646717    | 5777280   | 7304390    | 5818042.5  | 5582827.5 | 1813819.12 | 5725922   | 5381208    | 4823107    | 0.9   |
| Q9916  | Pand6   | 20S proteasome non-ATPase regulatory subunit 6 (Mus musculus) | 123.744 | 62.24 | 45356  | 8032882    | 48963004  | 48354340   | 30110708   | 46710034  | 44837268   | 46973252  | 5142040    | 5142040    | 1.135 |
| Q9916  | Rap1b   | 20S proteasome non-ATPase regulatory subunit 6 (Mus musculus) | 675.93  | 72.28 | 45356  | 8032882    | 48963004  | 48354340   | 30110708   | 46710034  | 44837268   | 46973252  | 5142040    | 5142040    | 1.135 |
| Q99181 | Srcd1   | Stomatin-like protein 1 (Mus musculus)                        | 322.58  | 26.4  | 53649  | 7248131    | 7292594   | 7483075    | 10638345   | 7148348   | 8736262    | 9207212   | 7331724.5  | 7292594    | 0.836 |
| Q99182 | Acyl    | Acyl-CoA oxidase 2 (Mus musculus)                             | 322.58  | 26.4  | 53649  | 7248131    | 7292594   | 7483075    | 10638345   | 7148348   | 8736262    | 9207212   | 7331724.5  | 7292594    | 0.836 |
| Q99182 | Acyl    | Acyl-CoA oxidase 2 (Mus musculus)                             | 322.58  | 26.4  | 53649  | 7248131    | 7292594   | 7483075    | 10638345   | 7148348   | 8736262    | 9207212   | 7331724.5  | 7292594    | 0.836 |
| Q99182 | Acyl    | Acyl-CoA oxidase 2 (Mus musculus)                             | 322.58  | 26.4  | 53649  | 7248131    | 7292594   | 7483075    | 10638345   | 7148348   | 8736262    | 9207212   | 7331724.5  | 7292594    | 0.836 |
| Q99182 | Acyl    | Acyl-CoA oxidase 2 (Mus musculus)                             | 322.58  | 26.4  | 53649  | 7248131    | 7292594   | 7483075    | 10638345   | 7148348   | 8736262    | 9207212   | 7331724.5  | 7292594    | 0.836 |
| Q99182 | Acyl    | Acyl-CoA oxidase 2 (Mus musculus)                             | 322.58  | 26.4  | 53649  | 7248131    | 7292594   | 7483075    | 10638345   | 7148348   | 8736262    | 9207212   | 7331724.5  | 7292594    | 0.836 |
| Q99182 | Acyl    | Acyl-CoA oxidase 2 (Mus musculus)                             | 322.58  | 26.4  | 53649  | 7248131    | 7292594   | 7483075    | 10638345   | 7148348   | 8736262    | 9207212   | 7331724.5  | 7292594    | 0.836 |
| Q99182 | Acyl    | Acyl-CoA oxidase 2 (Mus musculus)                             | 322.58  | 26.4  | 53649  | 7248131    | 7292594   | 7483075    | 10638345   | 7148348   | 8736262    | 9207212   | 7331724.5  | 7292594    | 0.836 |
| Q99182 | Acyl    | Acyl-CoA oxidase 2 (Mus musculus)                             | 322.58  | 26.4  | 53649  | 7248131    | 7292594   | 7483075    | 10638345   | 7148348   | 8736262    | 9207212   | 7331724.5  | 7292594    | 0.836 |
| Q99182 | Acyl    | Acyl-CoA oxidase 2 (Mus musculus)                             | 322.58  | 26.4  | 53649  | 7248131    | 7292594   | 7483075    | 10638345   | 7148348   | 8736262    | 9207212   | 7331724.5  | 7292594    | 0.836 |
| Q99182 | Acyl    | Acyl-CoA oxidase 2 (Mus musculus)                             | 322.58  | 26.4  | 53649  | 7248131    | 7292594   | 7483075    | 10638345   | 7148348   | 8736262    | 9207212   | 7331724.5  | 7292594    | 0.836 |
| Q99182 | Acyl    | Acyl-CoA oxidase 2 (Mus musculus)                             | 322.58  | 26.4  | 53649  | 7248131    | 7292594   | 7483075    | 10638345   | 7148348   | 8736262    | 9207212   | 7331724.5  | 7292594    | 0.836 |
| Q99182 | Acyl    | Acyl-CoA oxidase 2 (Mus musculus)                             | 322.58  | 26.4  | 53649  | 7248131    | 7292594   | 7483075    | 10638345   | 7148348   | 8736262    | 9207212   | 7331724.5  | 7292594    | 0.836 |
| Q99182 | Acyl    | Acyl-CoA oxidase 2 (Mus musculus)                             | 322.58  | 26.4  | 53649  | 7248131    | 7292594   | 7483075    | 10638345   | 7148348   | 8736262    | 9207212   | 7331724.5  | 7292594    | 0.836 |
| Q99182 | Acyl    | Acyl-CoA oxidase 2 (Mus musculus)                             | 322.58  | 26.4  | 53649  | 7248131    | 7292594   | 7483075    | 10638345   | 7148348   | 8736262    | 9207212   | 7331724.5  | 7292594    | 0.836 |
| Q99182 | Acyl    | Acyl-CoA oxidase 2 (Mus musculus)                             | 322.58  | 26.4  | 53649  | 7248131    | 7292594   | 7483075    | 10638345   | 7148348   | 8736262    | 9207212   | 7331724.5  | 7292594    | 0.836 |
| Q99182 | Acyl    | Acyl-CoA oxidase 2 (Mus musculus)                             | 322.58  | 26.4  | 53649  | 7248131    | 7292594   | 7483075    | 10638345   | 7148348   | 8736262    | 9207212   | 7331724.5  | 7292594    | 0.836 |
| Q99182 | Acyl    | Acyl-CoA oxidase 2 (Mus musculus)                             | 322.58  | 26.4  | 53649  | 7248131    | 7292594   | 7483075    | 10638345   | 7148348   | 8736262    | 9207212   | 7331724.5  | 7292594    | 0.836 |
| Q99182 | Acyl    | Acyl-CoA oxidase 2 (Mus musculus)                             | 322.58  | 26.4  | 53649  | 7248131    | 7292594   | 7483075    | 10638345   | 7148348   | 8736262    | 9207212   | 7331724.5  | 7292594    | 0.836 |
| Q99182 | Acyl    | Acyl-CoA oxidase 2 (Mus musculus)                             | 322.58  | 26.4  | 53649  | 7248131    | 7292594   | 7483075    | 10638345   | 7148348   | 8736262    | 9207212   | 7331724.5  | 7292594    | 0.836 |
| Q99182 | Acyl    | Acyl-CoA oxidase 2 (Mus musculus)                             | 322.58  | 26.4  | 53649  | 7248131    | 7292594   | 7483075    | 10638345   | 7148348   | 8736262    | 9207212   | 7331724.5  | 7292594    | 0.836 |
| Q99182 | Acyl    | Acyl-CoA oxidase 2 (Mus musculus)                             | 322.58  | 26.4  | 53649  | 7248131    | 7292594   | 7483075    | 10638345   | 7148348   | 8736262    | 9207212   | 7331724.5  | 7292594    | 0.836 |
| Q99182 | Acyl    | Acyl-CoA oxidase 2 (Mus musculus)                             | 322.58  | 26.4  | 53649  | 7248131    | 7292594   | 7483075    | 10638345   | 7148348   | 8736262    | 9207212   | 7331724.5  | 7292594    | 0.836 |
| Q99182 | Acyl    | Acyl-CoA oxidase 2 (Mus musculus)                             | 322.58  | 26.4  | 53649  | 7248131    | 7292594   | 7483075    | 10638345   | 7148348   | 8736262    | 9207212   | 7331724.5  | 7292594    | 0.836 |
| Q99182 | Acyl    | Acyl-CoA oxidase 2 (Mus musculus)                             | 322.58  | 26.4  | 53649  | 7248131    | 7292594   | 7483075    | 10638345   | 7148348   | 8736262    | 9207212   | 7331724.5  | 7292594    | 0.836 |
| Q99182 | Acyl    | Acyl-CoA oxidase 2 (Mus musculus)                             | 322.58  | 26.4  | 53649  | 7248131    | 7292594   | 7483075    | 10638345   | 7148348   | 8736262    | 9207212   | 7331724.5  | 7292594    | 0.836 |
| Q99182 | Acyl    | Acyl-CoA oxidase 2 (Mus musculus)                             | 322.58  | 26.4  | 53649  | 7248131    | 7292594   | 7483075    | 10638345   | 7148348   | 8736262    | 9207212   | 7331724.5  | 7292594    | 0.836 |
| Q99182 | Acyl    | Acyl-CoA oxidase 2 (Mus musculus)                             | 322.58  | 26.4  | 53649  | 7248131    | 7292594   | 7483075    | 10638345   | 7148348   | 8736262    | 9207212   | 7331724.5  | 7292594    | 0.836 |
| Q99182 | Acyl    | Acyl-CoA oxidase 2 (Mus musculus)                             | 322.58  | 26.4  | 53649  | 7248131    | 7292594   | 7483075    | 10638345   | 7148348   | 8736262    | 9207212   | 7331724.5  | 7292594    | 0.836 |
| Q99182 | Acyl    | Acyl-CoA oxidase 2 (Mus musculus)                             | 322.58  | 26.4  | 53649  | 7248131    | 7292594   | 7483075    | 10638345   | 7148348   | 8736262    | 9207212   | 7331724.5  | 7292594    | 0.836 |
| Q99182 | Acyl    | Acyl-CoA oxidase 2 (Mus musculus)                             | 322.58  | 26.4  | 53649  | 7248131    | 7292594   | 7483075    | 10638345   | 7148348   | 8736262    | 9207212   | 7331724.5  | 7292594    | 0.836 |
| Q99182 | Acyl    | Acyl-CoA oxidase 2 (Mus musculus)                             | 322.58  | 26.4  | 53649  | 7248131    | 7292594   | 7483075    | 10638345   | 7148348   | 8736262    | 9207212   | 7331724.5  | 7292594    | 0.836 |
| Q99182 | Acyl    | Acyl-CoA oxidase 2 (Mus musculus)                             | 322.58  | 26.4  | 53649  | 7248131    | 7292594   | 7483075    | 10638345   | 7148348   | 8736262    | 9207212   | 7331724.5  | 7292594    | 0.836 |
| Q99182 | Acyl    | Acyl-CoA oxidase 2 (Mus musculus)                             | 322.58  | 26.4  | 53649  | 7248131    | 7292594   | 7483075    | 10638345   | 7148348   | 8736262    | 9207212   | 7331724.5  | 7292594    | 0.836 |
| Q99182 | Acyl    | Acyl-CoA oxidase 2 (Mus musculus)                             | 322.58  | 26.4  | 53649  | 7248131    | 7292594   | 7483075    | 10638345   | 7148348   | 8736262    | 9207212   | 7331724.5  | 7292594    | 0.836 |
| Q99182 | Acyl    | Acyl-CoA oxidase 2 (Mus musculus)                             | 322.58  | 26.4  | 53649  | 7248131    | 7292594   | 7483075    | 10638345   | 7148348   | 8736262    | 9207212   | 7331724.5  | 7292594    | 0.836 |
| Q99182 | Acyl    | Acyl-CoA oxidase 2 (Mus musculus)                             | 322.58  | 26.4  | 53649  | 7248131    | 7292594   | 7483075    | 10638345   | 7148348   | 8736262    | 9207212   | 7331724.5  | 7292594    | 0.836 |
| Q99182 | Acyl    | Acyl-CoA oxidase 2 (Mus musculus)                             | 322.58  | 26.4  | 53649  | 7248131    | 7292594   | 7483075    | 10638345   | 7148348   | 8736262    | 9207212   | 7331724.5  | 7292594    | 0.836 |
| Q99182 | Acyl    | Acyl-CoA oxidase 2 (Mus musculus)                             | 322.58  | 26.4  | 53649  | 7248131    | 7292594   | 7483075    | 10638345   | 7148348   | 8736262    | 9207212   | 7331724.5  | 7292594    | 0.836 |
| Q99182 | Acyl    | Acyl-CoA oxidase 2 (Mus musculus)                             | 322.58  | 26.4  | 53649  | 7248131    | 7292594   | 7483075    | 10638345   | 7148348   | 8736262    | 9207212   | 7331724.5  | 7292594    | 0.836 |
| Q99182 | Acyl    | Acyl-CoA oxidase 2 (Mus musculus)                             | 322.58  | 26.4  | 53649  | 7248131    | 7292594   | 7483075    | 10638345   | 7148348   | 8736262    | 9207212   | 7331724.5  | 7292594    | 0.836 |
| Q99182 | Acyl    | Acyl-CoA oxidase 2 (Mus musculus)                             | 322.58  | 26.4  | 53649  | 7248131    | 7292594   | 7483075    | 10638345   | 7148348   | 8736262    | 9207212   | 7331724.5  | 7292594    | 0.836 |
| Q99182 | Acyl    | Acyl-CoA oxidase 2 (Mus musculus)                             | 322.58  | 26.4  | 53649  | 7248131    | 7292594   | 7483075    | 10638345   | 7148348   | 8736262    | 9207212   | 7331724.5  | 7292594    | 0.836 |
| Q99182 | Acyl    | Acyl-CoA oxidase 2 (Mus musculus)                             | 322.58  | 26.4  | 53649  | 7248131    | 7292594   | 7483075    | 10638345   | 7148348   | 8736262    | 9207212   | 7331724.5  | 7292594    | 0.836 |
| Q99182 | Acyl    | Acyl-CoA oxidase 2 (Mus musculus)                             | 322.58  | 26.4  | 53649  | 7248131    | 7292594   | 7483075    | 10638345   | 7148348   | 8736262    | 9207212   | 7331724.5  | 7292594    | 0.836 |
| Q99182 | Acyl    | Acyl-CoA oxidase 2 (Mus musculus)                             | 322.58  | 26.4  | 53649  | 7248131    | 7292594   | 7483075    | 10638345   | 7148348   | 8736262    | 9207212   | 7331724.5  | 7292594    | 0.836 |
| Q99182 | Acyl    | Acyl-CoA oxidase 2 (Mus musculus)                             | 322.58  | 26.4  | 53649  | 7248131    | 7292594   | 7483075    | 10638345   | 7148348   | 8736262    | 9207212   | 7331724.5  | 7292594    | 0.836 |
| Q99182 | Acyl    | Acyl-CoA oxidase 2 (Mus musculus)                             | 322.58  | 26.4  | 53649  | 7248131    | 7292594   | 7483075    | 10638345   | 7148348   | 8736262    | 9207212   | 7331724.5  | 7292594    | 0.836 |
| Q99182 | Acyl    | Acyl-CoA oxidase 2 (Mus musculus)                             | 322.58  | 26.4  | 53649  | 7248131    | 7292594   | 7483075    | 10638345   | 7148348   | 8736262    | 9207212   | 7331724.5  | 7292594    | 0.836 |
| Q99182 | Acyl    | Acyl-CoA oxidase 2 (Mus musculus)                             | 322.58  | 26.4  | 53649  | 7248131    | 7292594   | 7483075    | 10638345   | 7148348   | 8736262    | 9207212   | 7331724.5  | 7292594    | 0.836 |
| Q99182 | Acyl    | Acyl-CoA oxidase 2 (Mus musculus)                             | 322.58  | 26.4  | 53649  | 7248131    | 7292594   | 7483075    | 10638345   | 7148348   | 8736262    | 9207212   | 7331724.5  | 7292594    | 0.836 |
| Q991   |         |                                                               |         |       |        |            |           |            |            |           |            |           |            |            |       |







|        |                           |                                                                            |         |       |        |    |            |            |            |           |           |            |            |            |            |          |
|--------|---------------------------|----------------------------------------------------------------------------|---------|-------|--------|----|------------|------------|------------|-----------|-----------|------------|------------|------------|------------|----------|
| Q9H272 | Cyt-c                     | Cyt-c                                                                      | 1030.06 | 27.56 | 94.60  | 19 | 20873304   | 30587390   | 30284974   | 30679774  | 33656644  | 29754456   | 34412382   | 38731748   | 36047888   | 1.223    |
| Q9H288 | 2S8 thiosonal protein S29 | mitochondrial (Mus musculus)                                               | 347.04  | 24.3  | 44.69  | 2  | 44233075   | 54835856   | 29707870   | 42343525  | 30796275  | 4430955    | 409666     | 3816954.75 | 37644633   | 0.930    |
| Q9H289 | Gamma porrin              | (Mus musculus)                                                             | 370.63  | 6.34  | 37.03  | 2  | 1172885.12 | 1889636    | 1342733.25 | 14009609  | 10579624  | 153466.75  | 153466.75  | 153466.75  | 1258082.38 | 0.920    |
| Q9H287 | LRR-type domain           | (Mus musculus)                                                             | 80.56   | 10.71 | 25.07  | 2  | 1620808.38 | 75207599   | 6772866    | 3382885   | 660166.5  | 5321105    | 4775720    | 5395889    | 6884002    | 0.889    |
| Q9H275 | Wdr1                      | Wdr1 repeat-containing protein 61 (Mus musculus)                           | 391.22  | 32.13 | 3373   | 5  | 2766819    | 5070363.5  | 766751     | 3382885   | 660166.5  | 603757.5   | 4086469.75 | 7684068    | 4417290.5  | 1.157    |
| Q9H280 | Linai1                    | LMN domain and actin-binding protein 1 (Mus musculus)                      | 132.72  | 5.84  | 84.00  | 3  | 155641.25  | 12324112   | 1300382    | 4574962.5 | 2266933   | 2156453.1  | 1650453.1  | 193296.5   | 187381.38  | 1.028    |
| Q9H277 | Ceil1                     | Ceil1                                                                      | 1088.57 | 26.06 | 110455 | 18 | 14304702   | 22312918   | 16234838   | 3000616   | 18912684  | 19016588   | 1442644    | 19369086   | 21334176   | 1.974562 |
| Q9H276 | Gnfr1                     | Gnfr1                                                                      | 475.02  | 23.24 | 16748  | 3  | 17218346   | 10964300   | 9381190    | 11625826  | 517516.28 | 12634224   | 11039356   | 13734459   | 19734539   | 1.011    |
| Q9H282 | Scamp2                    | Secretory carrier-associated membrane protein 2 (Mus musculus)             | 200.89  | 3.65  | 36.65  | 1  | 8439171    | 0          | 8286918    | 7429383   | 51151.38  | 6622304.25 | 540186.81  | 9972101    | 168910106  | 1.273    |
| Q9H283 | Nidul13                   | NAH1 dihydrogenase (ubiquinol) 1 alpha subfamily subunit 13 (Mus musculus) | 20.89   | 21.53 | 16.60  | 4  | 8138262.4  | 0          | 86022.58   | 7429383   | 51151.38  | 6622304.25 | 540186.81  | 9972101    | 168910106  | 0.995    |
| Q9H280 | Plekstrin                 | plekstrin domain-containing family A member 2 (Mus musculus)               | 53.67   | 3.76  | 47.80  | 2  | 7610567.71 | 0          | 586944.25  | 447199.72 | 5353730.5 | 7937710.5  | 0          | 80049.23   | 617484.88  | 1.234    |
| Q9H280 | Rab22                     | E3 SNIP protein ligase Rab22 (Mus musculus)                                | 91.12   | 8.58  | 34.121 | 20 | 17014032   | 14978249   | 16145300   | 4473915   | 15317058  | 13579864   | 18280826   | 19344866   | 1442486    | 1.133    |
| Q9H286 | Ubrap1                    | Ubiquitin conjugating factor E3 B (Mus musculus)                           | 186.55  | 4.94  | 133.18 | 4  | 22027925   | 1855307.5  | 486204.25  | 1473915   | 15317058  | 13579864   | 18280826   | 19344866   | 1442486    | 1.133    |
| Q9H286 | Ubrap2                    | Ubiquitin conjugating factor E3 C-epsilon phosphatase 1 (Mus musculus)     | 152.71  | 13.15 | 133.62 | 20 | 1931740    | 1532392.58 | 1281083.5  | 442912.12 | 736087.07 | 5874992    | 427804.25  | 5817476.1  | 509699.72  | 1.081    |
| Q9H287 | Ubrap3                    | Ubiquitin conjugating factor E3 D (Mus musculus)                           | 152.71  | 13.15 | 133.62 | 20 | 1931740    | 1532392.58 | 1281083.5  | 442912.12 | 736087.07 | 5874992    | 427804.25  | 5817476.1  | 509699.72  | 1.081    |
| Q9H287 | Ubrap4                    | Ubiquitin conjugating factor E3 E (Mus musculus)                           | 152.71  | 13.15 | 133.62 | 20 | 1931740    | 1532392.58 | 1281083.5  | 442912.12 | 736087.07 | 5874992    | 427804.25  | 5817476.1  | 509699.72  | 1.081    |
| Q9H287 | Ubrap5                    | Ubiquitin conjugating factor E3 F (Mus musculus)                           | 152.71  | 13.15 | 133.62 | 20 | 1931740    | 1532392.58 | 1281083.5  | 442912.12 | 736087.07 | 5874992    | 427804.25  | 5817476.1  | 509699.72  | 1.081    |
| Q9H287 | Ubrap6                    | Ubiquitin conjugating factor E3 G (Mus musculus)                           | 152.71  | 13.15 | 133.62 | 20 | 1931740    | 1532392.58 | 1281083.5  | 442912.12 | 736087.07 | 5874992    | 427804.25  | 5817476.1  | 509699.72  | 1.081    |
| Q9H287 | Ubrap7                    | Ubiquitin conjugating factor E3 H (Mus musculus)                           | 152.71  | 13.15 | 133.62 | 20 | 1931740    | 1532392.58 | 1281083.5  | 442912.12 | 736087.07 | 5874992    | 427804.25  | 5817476.1  | 509699.72  | 1.081    |
| Q9H287 | Ubrap8                    | Ubiquitin conjugating factor E3 I (Mus musculus)                           | 152.71  | 13.15 | 133.62 | 20 | 1931740    | 1532392.58 | 1281083.5  | 442912.12 | 736087.07 | 5874992    | 427804.25  | 5817476.1  | 509699.72  | 1.081    |
| Q9H287 | Ubrap9                    | Ubiquitin conjugating factor E3 J (Mus musculus)                           | 152.71  | 13.15 | 133.62 | 20 | 1931740    | 1532392.58 | 1281083.5  | 442912.12 | 736087.07 | 5874992    | 427804.25  | 5817476.1  | 509699.72  | 1.081    |
| Q9H287 | Ubrap10                   | Ubiquitin conjugating factor E3 K (Mus musculus)                           | 152.71  | 13.15 | 133.62 | 20 | 1931740    | 1532392.58 | 1281083.5  | 442912.12 | 736087.07 | 5874992    | 427804.25  | 5817476.1  | 509699.72  | 1.081    |
| Q9H287 | Ubrap11                   | Ubiquitin conjugating factor E3 L (Mus musculus)                           | 152.71  | 13.15 | 133.62 | 20 | 1931740    | 1532392.58 | 1281083.5  | 442912.12 | 736087.07 | 5874992    | 427804.25  | 5817476.1  | 509699.72  | 1.081    |
| Q9H287 | Ubrap12                   | Ubiquitin conjugating factor E3 M (Mus musculus)                           | 152.71  | 13.15 | 133.62 | 20 | 1931740    | 1532392.58 | 1281083.5  | 442912.12 | 736087.07 | 5874992    | 427804.25  | 5817476.1  | 509699.72  | 1.081    |
| Q9H287 | Ubrap13                   | Ubiquitin conjugating factor E3 N (Mus musculus)                           | 152.71  | 13.15 | 133.62 | 20 | 1931740    | 1532392.58 | 1281083.5  | 442912.12 | 736087.07 | 5874992    | 427804.25  | 5817476.1  | 509699.72  | 1.081    |
| Q9H287 | Ubrap14                   | Ubiquitin conjugating factor E3 O (Mus musculus)                           | 152.71  | 13.15 | 133.62 | 20 | 1931740    | 1532392.58 | 1281083.5  | 442912.12 | 736087.07 | 5874992    | 427804.25  | 5817476.1  | 509699.72  | 1.081    |
| Q9H287 | Ubrap15                   | Ubiquitin conjugating factor E3 P (Mus musculus)                           | 152.71  | 13.15 | 133.62 | 20 | 1931740    | 1532392.58 | 1281083.5  | 442912.12 | 736087.07 | 5874992    | 427804.25  | 5817476.1  | 509699.72  | 1.081    |
| Q9H287 | Ubrap16                   | Ubiquitin conjugating factor E3 Q (Mus musculus)                           | 152.71  | 13.15 | 133.62 | 20 | 1931740    | 1532392.58 | 1281083.5  | 442912.12 | 736087.07 | 5874992    | 427804.25  | 5817476.1  | 509699.72  | 1.081    |
| Q9H287 | Ubrap17                   | Ubiquitin conjugating factor E3 R (Mus musculus)                           | 152.71  | 13.15 | 133.62 | 20 | 1931740    | 1532392.58 | 1281083.5  | 442912.12 | 736087.07 | 5874992    | 427804.25  | 5817476.1  | 509699.72  | 1.081    |
| Q9H287 | Ubrap18                   | Ubiquitin conjugating factor E3 S (Mus musculus)                           | 152.71  | 13.15 | 133.62 | 20 | 1931740    | 1532392.58 | 1281083.5  | 442912.12 | 736087.07 | 5874992    | 427804.25  | 5817476.1  | 509699.72  | 1.081    |
| Q9H287 | Ubrap19                   | Ubiquitin conjugating factor E3 T (Mus musculus)                           | 152.71  | 13.15 | 133.62 | 20 | 1931740    | 1532392.58 | 1281083.5  | 442912.12 | 736087.07 | 5874992    | 427804.25  | 5817476.1  | 509699.72  | 1.081    |
| Q9H287 | Ubrap20                   | Ubiquitin conjugating factor E3 U (Mus musculus)                           | 152.71  | 13.15 | 133.62 | 20 | 1931740    | 1532392.58 | 1281083.5  | 442912.12 | 736087.07 | 5874992    | 427804.25  | 5817476.1  | 509699.72  | 1.081    |
| Q9H287 | Ubrap21                   | Ubiquitin conjugating factor E3 V (Mus musculus)                           | 152.71  | 13.15 | 133.62 | 20 | 1931740    | 1532392.58 | 1281083.5  | 442912.12 | 736087.07 | 5874992    | 427804.25  | 5817476.1  | 509699.72  | 1.081    |
| Q9H287 | Ubrap22                   | Ubiquitin conjugating factor E3 W (Mus musculus)                           | 152.71  | 13.15 | 133.62 | 20 | 1931740    | 1532392.58 | 1281083.5  | 442912.12 | 736087.07 | 5874992    | 427804.25  | 5817476.1  | 509699.72  | 1.081    |
| Q9H287 | Ubrap23                   | Ubiquitin conjugating factor E3 X (Mus musculus)                           | 152.71  | 13.15 | 133.62 | 20 | 1931740    | 1532392.58 | 1281083.5  | 442912.12 | 736087.07 | 5874992    | 427804.25  | 5817476.1  | 509699.72  | 1.081    |
| Q9H287 | Ubrap24                   | Ubiquitin conjugating factor E3 Y (Mus musculus)                           | 152.71  | 13.15 | 133.62 | 20 | 1931740    | 1532392.58 | 1281083.5  | 442912.12 | 736087.07 | 5874992    | 427804.25  | 5817476.1  | 509699.72  | 1.081    |
| Q9H287 | Ubrap25                   | Ubiquitin conjugating factor E3 Z (Mus musculus)                           | 152.71  | 13.15 | 133.62 | 20 | 1931740    | 1532392.58 | 1281083.5  | 442912.12 | 736087.07 | 5874992    | 427804.25  | 5817476.1  | 509699.72  | 1.081    |
| Q9H287 | Ubrap26                   | Ubiquitin conjugating factor E3 A (Mus musculus)                           | 152.71  | 13.15 | 133.62 | 20 | 1931740    | 1532392.58 | 1281083.5  | 442912.12 | 736087.07 | 5874992    | 427804.25  | 5817476.1  | 509699.72  | 1.081    |
| Q9H287 | Ubrap27                   | Ubiquitin conjugating factor E3 B (Mus musculus)                           | 152.71  | 13.15 | 133.62 | 20 | 1931740    | 1532392.58 | 1281083.5  | 442912.12 | 736087.07 | 5874992    | 427804.25  | 5817476.1  | 509699.72  | 1.081    |
| Q9H287 | Ubrap28                   | Ubiquitin conjugating factor E3 C (Mus musculus)                           | 152.71  | 13.15 | 133.62 | 20 | 1931740    | 1532392.58 | 1281083.5  | 442912.12 | 736087.07 | 5874992    | 427804.25  | 5817476.1  | 509699.72  | 1.081    |
| Q9H287 | Ubrap29                   | Ubiquitin conjugating factor E3 D (Mus musculus)                           | 152.71  | 13.15 | 133.62 | 20 | 1931740    | 1532392.58 | 1281083.5  | 442912.12 | 736087.07 | 5874992    | 427804.25  | 5817476.1  | 509699.72  | 1.081    |
| Q9H287 | Ubrap30                   | Ubiquitin conjugating factor E3 E (Mus musculus)                           | 152.71  | 13.15 | 133.62 | 20 | 1931740    | 1532392.58 | 1281083.5  | 442912.12 | 736087.07 | 5874992    | 427804.25  | 5817476.1  | 509699.72  | 1.081    |
| Q9H287 | Ubrap31                   | Ubiquitin conjugating factor E3 F (Mus musculus)                           | 152.71  | 13.15 | 133.62 | 20 | 1931740    | 1532392.58 | 1281083.5  | 442912.12 | 736087.07 | 5874992    | 427804.25  | 5817476.1  | 509699.72  | 1.081    |
| Q9H287 | Ubrap32                   | Ubiquitin conjugating factor E3 G (Mus musculus)                           | 152.71  | 13.15 | 133.62 | 20 | 1931740    | 1532392.58 | 1281083.5  | 442912.12 | 736087.07 | 5874992    | 427804.25  | 5817476.1  | 509699.72  | 1.081    |
| Q9H287 | Ubrap33                   | Ubiquitin conjugating factor E3 H (Mus musculus)                           | 152.71  | 13.15 | 133.62 | 20 | 1931740    | 1532392.58 | 1281083.5  | 442912.12 | 736087.07 | 5874992    | 427804.25  | 5817476.1  | 509699.72  | 1.081    |
| Q9H287 | Ubrap34                   | Ubiquitin conjugating factor E3 I (Mus musculus)                           | 152.71  | 13.15 | 133.62 | 20 | 1931740    | 1532392.58 | 1281083.5  | 442912.12 | 736087.07 | 5874992    | 427804.25  | 5817476.1  | 509699.72  | 1.081    |
| Q9H287 | Ubrap35                   | Ubiquitin conjugating factor E3 J (Mus musculus)                           | 152.71  | 13.15 | 133.62 | 20 | 1931740    | 1532392.58 | 1281083.5  | 442912.12 | 736087.07 | 5874992    | 427804.25  | 5817476.1  | 509699.72  | 1.081    |
| Q9H287 | Ubrap36                   | Ubiquitin conjugating factor E3 K (Mus musculus)                           | 152.71  | 13.15 | 133.62 | 20 | 1931740    | 1532392.58 | 1281083.5  | 442912.12 | 736087.07 | 5874992    | 427804.25  | 5817476.1  | 509699.72  | 1.081    |
| Q9H287 | Ubrap37                   | Ubiquitin conjugating factor E3 L (Mus musculus)                           | 152.71  | 13.15 | 133.62 | 20 | 1931740    | 1532392.58 | 1281083.5  | 442912.12 | 736087.07 | 5874992    | 427804.25  | 5817476.1  | 509699.72  | 1.081    |
| Q9H287 | Ubrap38                   | Ubiquitin conjugating factor E3 M (Mus musculus)                           | 152.71  | 13.15 | 133.62 | 20 | 1931740    | 1532392.58 | 1281083.5  | 442912.12 | 736087.07 | 5874992    | 427804.25  | 5817476.1  | 509699.72  | 1.081    |
| Q9H287 | Ubrap39                   | Ubiquitin conjugating factor E3 N (Mus musculus)                           | 152.71  | 13.15 | 133.62 | 20 | 1931740    | 1532392.58 | 1281083.5  | 442912.12 | 736087.07 | 5874992    | 427804.25  | 5817476.1  | 509699.72  | 1.081    |
| Q9H287 | Ubrap40                   | Ubiquitin conjugating factor E3 O (Mus musculus)                           | 152.71  | 13.15 | 133.62 | 20 | 1931740    | 1532392.58 | 1281083.5  | 442912.12 | 736087.07 | 5874992    | 427804.25  | 5817476.1  | 509699.72  | 1.081    |
| Q9H287 | Ubrap41                   | Ubiquitin conjugating factor E3 P (Mus musculus)                           | 152.71  | 13.15 | 133.62 | 20 | 1931740    | 1532392.58 | 1281083.5  | 442912.12 | 736087.07 | 5874992    | 427804.25  | 5817476.1  | 509699.72  | 1.081    |
| Q9H287 | Ubrap42                   | Ubiquitin conjugating factor E3 Q (Mus musculus)                           | 152.71  | 13.15 | 133.62 | 20 | 1931740    | 1532392.58 | 1281083.5  | 442912.12 | 736087.07 | 5874992    | 427804.25  | 5817476.1  | 509699.72  | 1.081    |
| Q9H287 | Ubrap43                   | Ubiquitin conjugating factor E3 R (Mus musculus)                           | 152.71  | 13.15 | 133.62 | 20 | 1931740    | 1532392.58 | 1281083.5  | 442912.12 | 736087.07 | 5874992    | 427804.25  | 5817476.1  | 509699.72  | 1.081    |
| Q9H287 | Ubrap44                   | Ubiquitin conjugating factor E3 S (Mus musculus)                           | 152.71  | 13.15 | 133.62 | 20 | 1931740    | 1532392.58 | 1281083.5  | 442912.12 | 736087.07 | 5874992    | 427804.25  | 5817476.1  | 509699.72  | 1.081    |
| Q9H287 | Ubrap45                   | Ubiquitin conjugating factor E3 T (Mus musculus)                           | 152.71  | 13.15 | 133.62 | 20 | 1931740    | 1532392.58 | 1281083.5  | 442912.12 | 736087.07 | 5874992    | 427804.25  | 5817476.1  | 509699.72  | 1.081    |
| Q9H287 | Ubrap46                   | Ubiquitin conjugating factor E3 U (Mus musculus)                           | 152.71  | 13.15 | 133.62 | 20 | 1931740    | 1532392.58 | 1281083.5  | 442912.12 | 736087.07 | 5874992    | 427804.25  | 5817476.1  | 509699.72  | 1.081    |
| Q9H287 |                           |                                                                            |         |       |        |    |            |            |            |           |           |            |            |            |            |          |

|        |       |                                                                |         |       |        |           |            |            |            |            |            |           |            |       |
|--------|-------|----------------------------------------------------------------|---------|-------|--------|-----------|------------|------------|------------|------------|------------|-----------|------------|-------|
| Q9HJH6 | Tenr1 | Threonine-related 1, cytoplasmic (Mus musculus)                | 1005.5  | 41.11 | 67984  | 33802732  | 4465172    | 45809612   | 41429752   | 47066308   | 47588332   | 46908784  | 44029072   | 1.087 |
| Q9HJH9 | Mrk8a | Unconventional protein, XVIII (Mus musculus)                   | 267.25  | 2.83  | 323755 | 25008311  | 3201123.5  | 2431576    | 2570533.5  | 1630114.5  | 2012320.5  | 47588332  | 4296397.5  | 0.983 |
| Q9QJH0 | Glx3  | Glutamatecristin 1 (Mus musculus)                              | 34.66   | 57.01 | 11871  | 17896298  | 15843557   | 21050492   | 15453004   | 22021972   | 19054092   | 18172434  | 18235054   | 1.082 |
| Q9QJH7 | Acad4 | Long-chain fatty acid-CoA ligase 4 (Mus musculus)              | 622.86  | 31.93 | 79072  | 102527907 | 54353928   | 55753804   | 62249304   | 64072236   | 64072236   | 72298966  | 64856728   | 1.049 |
| Q9QJH9 | Prad6 | Proteasome subunit alpha type-6 (Mus musculus)                 | 682.35  | 62.35 | 96235  | 78755000  | 78699720   | 88358308   | 62492966   | 71827360   | 66486864   | 71482980  | 71482980   | 0.949 |
| Q9QJN7 | Tlr2  | Toll-like receptor 2 (Mus musculus)                            | 203.1   | 9.31  | 89449  | 840126.25 | 3941767.5  | 2751767.5  | 26803425   | 1594714.88 | 2970184    | 4738188   | 5204565    | 6     |
| Q9QJH6 | Prp1  | Polylipase endoproteinase (Mus musculus)                       | 1076.64 | 36.62 | 80752  | 12635505  | 187640200  | 1743492    | 18897068   | 21582348   | 18710922   | 20587388  | 20603728   | 1.160 |
| Q9QJH7 | Prp1  | Polylipase endoproteinase (Mus musculus)                       | 46.34   | 9.09  | 18370  | 409838.72 | 1743492    | 18897068   | 21582348   | 18710922   | 20587388   | 20603728  | 20603728   | 2.485 |
| Q9QJH9 | Prp1b | Protein glycosylase class II, beta (Mus musculus)              | 719.737 | 20.42 | 115794 | 11993760  | 11184782   | 11523241   | 16021622   | 15323338   | 637339.12  | 663901.88 | 778831.19  | 8     |
| Q9QJH0 | Chrla | Chromatin assembly factor 1 subunit A (Mus musculus)           | 51.26   | 0.99  | 101936 | 13866608  | 1415201.38 | 1406559.12 | 1474650.38 | 1474650.38 | 1474650.38 | 1741661.2 | 1741661.2  | 1.180 |
| Q9QJH8 | Nrpa  | Alpha-N-acetylgalactosaminidase (Mus musculus)                 | 414.34  | 20    | 47235  | 7606807   | 12253323   | 11789047   | 9353569    | 8680825    | 8560474    | 8350995   | 1790739    | 8     |
| Q9QJH7 | Son1  | Protein SON (Mus musculus)                                     | 246.71  | 4.26  | 26651  | 4652330   | 5140802    | 5259302    | 5108272    | 3310064.5  | 3686842    | 4438465   | 4191480.5  | 0.875 |
| Q9QJH2 | Dag2  | Developmentally-regulated GTP-binding protein 2 (Mus musculus) | 46.54   | 25.82 | 40718  | 862927    | 11766044   | 12567036   | 10926240   | 1757520.5  | 1757520.5  | 1757520.5 | 1757520.5  | 1.197 |
| Q9QJH4 | Acad6 | Acyl-CoA synthetase, A synthetase, cytoplasmic (Mus musculus)  | 136.05  | 4.36  | 72872  | 1901511   | 1784534.12 | 2153101.42 | 2036634.12 | 11359141.2 | 11359141.2 | 11704447  | 1352590.12 | 0.625 |
| Q9QJH4 | Acad6 | Acyl-CoA synthetase, A synthetase, cytoplasmic (Mus musculus)  | 136.05  | 4.36  | 72872  | 1901511   | 1784534.12 | 2153101.42 | 2036634.12 | 11359141.2 | 11359141.2 | 11704447  | 1352590.12 | 0.625 |
| Q9QJH4 | Acad6 | Acyl-CoA synthetase, A synthetase, cytoplasmic (Mus musculus)  | 136.05  | 4.36  | 72872  | 1901511   | 1784534.12 | 2153101.42 | 2036634.12 | 11359141.2 | 11359141.2 | 11704447  | 1352590.12 | 0.625 |
| Q9QJH4 | Acad6 | Acyl-CoA synthetase, A synthetase, cytoplasmic (Mus musculus)  | 136.05  | 4.36  | 72872  | 1901511   | 1784534.12 | 2153101.42 | 2036634.12 | 11359141.2 | 11359141.2 | 11704447  | 1352590.12 | 0.625 |
| Q9QJH4 | Acad6 | Acyl-CoA synthetase, A synthetase, cytoplasmic (Mus musculus)  | 136.05  | 4.36  | 72872  | 1901511   | 1784534.12 | 2153101.42 | 2036634.12 | 11359141.2 | 11359141.2 | 11704447  | 1352590.12 | 0.625 |
| Q9QJH4 | Acad6 | Acyl-CoA synthetase, A synthetase, cytoplasmic (Mus musculus)  | 136.05  | 4.36  | 72872  | 1901511   | 1784534.12 | 2153101.42 | 2036634.12 | 11359141.2 | 11359141.2 | 11704447  | 1352590.12 | 0.625 |
| Q9QJH4 | Acad6 | Acyl-CoA synthetase, A synthetase, cytoplasmic (Mus musculus)  | 136.05  | 4.36  | 72872  | 1901511   | 1784534.12 | 2153101.42 | 2036634.12 | 11359141.2 | 11359141.2 | 11704447  | 1352590.12 | 0.625 |
| Q9QJH4 | Acad6 | Acyl-CoA synthetase, A synthetase, cytoplasmic (Mus musculus)  | 136.05  | 4.36  | 72872  | 1901511   | 1784534.12 | 2153101.42 | 2036634.12 | 11359141.2 | 11359141.2 | 11704447  | 1352590.12 | 0.625 |
| Q9QJH4 | Acad6 | Acyl-CoA synthetase, A synthetase, cytoplasmic (Mus musculus)  | 136.05  | 4.36  | 72872  | 1901511   | 1784534.12 | 2153101.42 | 2036634.12 | 11359141.2 | 11359141.2 | 11704447  | 1352590.12 | 0.625 |
| Q9QJH4 | Acad6 | Acyl-CoA synthetase, A synthetase, cytoplasmic (Mus musculus)  | 136.05  | 4.36  | 72872  | 1901511   | 1784534.12 | 2153101.42 | 2036634.12 | 11359141.2 | 11359141.2 | 11704447  | 1352590.12 | 0.625 |
| Q9QJH4 | Acad6 | Acyl-CoA synthetase, A synthetase, cytoplasmic (Mus musculus)  | 136.05  | 4.36  | 72872  | 1901511   | 1784534.12 | 2153101.42 | 2036634.12 | 11359141.2 | 11359141.2 | 11704447  | 1352590.12 | 0.625 |
| Q9QJH4 | Acad6 | Acyl-CoA synthetase, A synthetase, cytoplasmic (Mus musculus)  | 136.05  | 4.36  | 72872  | 1901511   | 1784534.12 | 2153101.42 | 2036634.12 | 11359141.2 | 11359141.2 | 11704447  | 1352590.12 | 0.625 |
| Q9QJH4 | Acad6 | Acyl-CoA synthetase, A synthetase, cytoplasmic (Mus musculus)  | 136.05  | 4.36  | 72872  | 1901511   | 1784534.12 | 2153101.42 | 2036634.12 | 11359141.2 | 11359141.2 | 11704447  | 1352590.12 | 0.625 |
| Q9QJH4 | Acad6 | Acyl-CoA synthetase, A synthetase, cytoplasmic (Mus musculus)  | 136.05  | 4.36  | 72872  | 1901511   | 1784534.12 | 2153101.42 | 2036634.12 | 11359141.2 | 11359141.2 | 11704447  | 1352590.12 | 0.625 |
| Q9QJH4 | Acad6 | Acyl-CoA synthetase, A synthetase, cytoplasmic (Mus musculus)  | 136.05  | 4.36  | 72872  | 1901511   | 1784534.12 | 2153101.42 | 2036634.12 | 11359141.2 | 11359141.2 | 11704447  | 1352590.12 | 0.625 |
| Q9QJH4 | Acad6 | Acyl-CoA synthetase, A synthetase, cytoplasmic (Mus musculus)  | 136.05  | 4.36  | 72872  | 1901511   | 1784534.12 | 2153101.42 | 2036634.12 | 11359141.2 | 11359141.2 | 11704447  | 1352590.12 | 0.625 |
| Q9QJH4 | Acad6 | Acyl-CoA synthetase, A synthetase, cytoplasmic (Mus musculus)  | 136.05  | 4.36  | 72872  | 1901511   | 1784534.12 | 2153101.42 | 2036634.12 | 11359141.2 | 11359141.2 | 11704447  | 1352590.12 | 0.625 |
| Q9QJH4 | Acad6 | Acyl-CoA synthetase, A synthetase, cytoplasmic (Mus musculus)  | 136.05  | 4.36  | 72872  | 1901511   | 1784534.12 | 2153101.42 | 2036634.12 | 11359141.2 | 11359141.2 | 11704447  | 1352590.12 | 0.625 |
| Q9QJH4 | Acad6 | Acyl-CoA synthetase, A synthetase, cytoplasmic (Mus musculus)  | 136.05  | 4.36  | 72872  | 1901511   | 1784534.12 | 2153101.42 | 2036634.12 | 11359141.2 | 11359141.2 | 11704447  | 1352590.12 | 0.625 |
| Q9QJH4 | Acad6 | Acyl-CoA synthetase, A synthetase, cytoplasmic (Mus musculus)  | 136.05  | 4.36  | 72872  | 1901511   | 1784534.12 | 2153101.42 | 2036634.12 | 11359141.2 | 11359141.2 | 11704447  | 1352590.12 | 0.625 |
| Q9QJH4 | Acad6 | Acyl-CoA synthetase, A synthetase, cytoplasmic (Mus musculus)  | 136.05  | 4.36  | 72872  | 1901511   | 1784534.12 | 2153101.42 | 2036634.12 | 11359141.2 | 11359141.2 | 11704447  | 1352590.12 | 0.625 |
| Q9QJH4 | Acad6 | Acyl-CoA synthetase, A synthetase, cytoplasmic (Mus musculus)  | 136.05  | 4.36  | 72872  | 1901511   | 1784534.12 | 2153101.42 | 2036634.12 | 11359141.2 | 11359141.2 | 11704447  | 1352590.12 | 0.625 |
| Q9QJH4 | Acad6 | Acyl-CoA synthetase, A synthetase, cytoplasmic (Mus musculus)  | 136.05  | 4.36  | 72872  | 1901511   | 1784534.12 | 2153101.42 | 2036634.12 | 11359141.2 | 11359141.2 | 11704447  | 1352590.12 | 0.625 |
| Q9QJH4 | Acad6 | Acyl-CoA synthetase, A synthetase, cytoplasmic (Mus musculus)  | 136.05  | 4.36  | 72872  | 1901511   | 1784534.12 | 2153101.42 | 2036634.12 | 11359141.2 | 11359141.2 | 11704447  | 1352590.12 | 0.625 |
| Q9QJH4 | Acad6 | Acyl-CoA synthetase, A synthetase, cytoplasmic (Mus musculus)  | 136.05  | 4.36  | 72872  | 1901511   | 1784534.12 | 2153101.42 | 2036634.12 | 11359141.2 | 11359141.2 | 11704447  | 1352590.12 | 0.625 |
| Q9QJH4 | Acad6 | Acyl-CoA synthetase, A synthetase, cytoplasmic (Mus musculus)  | 136.05  | 4.36  | 72872  | 1901511   | 1784534.12 | 2153101.42 | 2036634.12 | 11359141.2 | 11359141.2 | 11704447  | 1352590.12 | 0.625 |
| Q9QJH4 | Acad6 | Acyl-CoA synthetase, A synthetase, cytoplasmic (Mus musculus)  | 136.05  | 4.36  | 72872  | 1901511   | 1784534.12 | 2153101.42 | 2036634.12 | 11359141.2 | 11359141.2 | 11704447  | 1352590.12 | 0.625 |
| Q9QJH4 | Acad6 | Acyl-CoA synthetase, A synthetase, cytoplasmic (Mus musculus)  | 136.05  | 4.36  | 72872  | 1901511   | 1784534.12 | 2153101.42 | 2036634.12 | 11359141.2 | 11359141.2 | 11704447  | 1352590.12 | 0.625 |
| Q9QJH4 | Acad6 | Acyl-CoA synthetase, A synthetase, cytoplasmic (Mus musculus)  | 136.05  | 4.36  | 72872  | 1901511   | 1784534.12 | 2153101.42 | 2036634.12 | 11359141.2 | 11359141.2 | 11704447  | 1352590.12 | 0.625 |
| Q9QJH4 | Acad6 | Acyl-CoA synthetase, A synthetase, cytoplasmic (Mus musculus)  | 136.05  | 4.36  | 72872  | 1901511   | 1784534.12 | 2153101.42 | 2036634.12 | 11359141.2 | 11359141.2 | 11704447  | 1352590.12 | 0.625 |
| Q9QJH4 | Acad6 | Acyl-CoA synthetase, A synthetase, cytoplasmic (Mus musculus)  | 136.05  | 4.36  | 72872  | 1901511   | 1784534.12 | 2153101.42 | 2036634.12 | 11359141.2 | 11359141.2 | 11704447  | 1352590.12 | 0.625 |
| Q9QJH4 | Acad6 | Acyl-CoA synthetase, A synthetase, cytoplasmic (Mus musculus)  | 136.05  | 4.36  | 72872  | 1901511   | 1784534.12 | 2153101.42 | 2036634.12 | 11359141.2 | 11359141.2 | 11704447  | 1352590.12 | 0.625 |
| Q9QJH4 | Acad6 | Acyl-CoA synthetase, A synthetase, cytoplasmic (Mus musculus)  | 136.05  | 4.36  | 72872  | 1901511   | 1784534.12 | 2153101.42 | 2036634.12 | 11359141.2 | 11359141.2 | 11704447  | 1352590.12 | 0.625 |
| Q9QJH4 | Acad6 | Acyl-CoA synthetase, A synthetase, cytoplasmic (Mus musculus)  | 136.05  | 4.36  | 72872  | 1901511   | 1784534.12 | 2153101.42 | 2036634.12 | 11359141.2 | 11359141.2 | 11704447  | 1352590.12 | 0.625 |
| Q9QJH4 | Acad6 | Acyl-CoA synthetase, A synthetase, cytoplasmic (Mus musculus)  | 136.05  | 4.36  | 72872  | 1901511   | 1784534.12 | 2153101.42 | 2036634.12 | 11359141.2 | 11359141.2 | 11704447  | 1352590.12 | 0.625 |
| Q9QJH4 | Acad6 | Acyl-CoA synthetase, A synthetase, cytoplasmic (Mus musculus)  | 136.05  | 4.36  | 72872  | 1901511   | 1784534.12 | 2153101.42 | 2036634.12 | 11359141.2 | 11359141.2 | 11704447  | 1352590.12 | 0.625 |
| Q9QJH4 | Acad6 | Acyl-CoA synthetase, A synthetase, cytoplasmic (Mus musculus)  | 136.05  | 4.36  | 72872  | 1901511   | 1784534.12 | 2153101.42 | 2036634.12 | 11359141.2 | 11359141.2 | 11704447  | 1352590.12 | 0.625 |
| Q9QJH4 | Acad6 | Acyl-CoA synthetase, A synthetase, cytoplasmic (Mus musculus)  | 136.05  | 4.36  | 72872  | 1901511   | 1784534.12 | 2153101.42 | 2036634.12 | 11359141.2 | 11359141.2 | 11704447  | 1352590.12 | 0.625 |
| Q9QJH4 | Acad6 | Acyl-CoA synthetase, A synthetase, cytoplasmic (Mus musculus)  | 136.05  | 4.36  | 72872  | 1901511   | 1784534.12 | 2153101.42 | 2036634.12 | 11359141.2 | 11359141.2 | 11704447  | 1352590.12 | 0.625 |
| Q9QJH4 | Acad6 | Acyl-CoA synthetase, A synthetase, cytoplasmic (Mus musculus)  | 136.05  | 4.36  | 72872  | 1901511   | 1784534.12 | 2153101.42 | 2036634.12 | 11359141.2 | 11359141.2 | 11704447  | 1352590.12 | 0.625 |
| Q9QJH4 | Acad6 | Acyl-CoA synthetase, A synthetase, cytoplasmic (Mus musculus)  | 136.05  | 4.36  | 72872  | 1901511   | 1784534.12 | 2153101.42 | 2036634.12 | 11359141.2 | 11359141.2 | 11704447  | 1352590.12 | 0.625 |
| Q9QJH4 | Acad6 | Acyl-CoA synthetase, A synthetase, cytoplasmic (Mus musculus)  | 136.05  | 4.36  | 72872  | 1901511   | 1784534.12 | 2153101.42 | 2036634.12 | 11359141.2 | 11359141.2 | 11704447  | 1352590.12 | 0.625 |
| Q9QJH4 | Acad6 | Acyl-CoA synthetase, A synthetase, cytoplasmic (Mus musculus)  | 136.05  | 4.36  | 72872  | 1901511   | 1784534.12 | 2153101.42 | 2036634.12 | 11359141.2 | 11359141.2 | 11704447  | 1352590.12 | 0.625 |
| Q9QJH4 | Acad6 | Acyl-CoA synthetase, A synthetase, cytoplasmic (Mus musculus)  | 136.05  | 4.36  | 72872  | 1901511   | 1784534.12 | 2153101.42 | 2036634.12 | 11359141.2 | 11359141.2 | 11704447  | 1352590.12 | 0.625 |
| Q9QJH4 | Acad6 | Acyl-CoA synthetase, A synthetase, cytoplasmic (Mus musculus)  | 136.05  | 4.36  | 72872  | 1901511   | 1784534.12 | 2153101.42 | 2036634.12 | 11359141.2 | 11359141.2 | 11704447  | 1352590.12 | 0.625 |
| Q9QJH4 | Acad6 | Acyl-CoA synthetase, A synthetase, cytoplasmic (Mus musculus)  | 136.05  | 4.36  | 72872  | 1901511   | 1784534.12 | 2153101.42 | 2036634.12 | 11359141.2 | 11359141.2 | 11704447  | 1352590.12 | 0.625 |
| Q9QJH4 | Acad6 | Acyl-CoA synthetase, A synthetase, cytoplasmic (Mus musculus)  | 136.05  | 4.36  | 72872  | 1901511   | 1784534.12 | 2153101.42 | 2036634.12 | 11359141.2 | 11359141.2 | 11704447  | 1352590.12 | 0.625 |
| Q9QJH4 | Acad6 | Acyl-CoA synthetase, A synthetase, cytoplasmic (Mus musculus)  | 136.05  | 4.36  | 72872  | 1901511   | 1784534.12 | 2153101.42 | 2036634.12 | 11359141.2 | 11359141.2 | 11704447  | 1352590.12 | 0.625 |
| Q9QJH4 | Acad6 | Acyl-CoA synthetase, A synthetase, cytoplasmic (Mus musculus)  | 136.05  | 4.36  | 72872  | 1901511   | 1784534.12 | 2153101.42 | 2036634.12 | 11359141.2 | 11359141.2 |           |            |       |
