# Supplementary material for: Biobased, biodegradable but not bio-neutral: about the effects of polylactic acid nanoparticles on macrophages
Source: Royal Society of Chemistry journal article supplement (doi:10.1039/d4en00335g), 2024-01-01
Supplement: d4en00335g3.pdf [file d4en00335g3.pdf]

Table with 34 columns: Gene Symbol, Gene Name, Accession Number, Description, and other identifiers. The table lists various genes such as Q9CXR8, Q9CZ30, P67984, Q60631, Q640N3, P66371, P51912, Q6ZQ06, P63664, Q99K69, Q8BP17, P68249, Q55142, Q8C011, P57716, Q61235, Q9E5T5, Q9EQH2, P27008, Q8K311, Q9J1Y4, Q9CQ43, P17078, Q8VEB4, Q55912, P54311, P54728, Q8R734, Q8C735, Q64430, Q63524, P19139, Q85S14, Q8P5E4, Q9YVL3, P09411, Q5T2G3, P97298, Q9WV55, P35770, P17136, Q99K10, and Aox2. Each row contains detailed gene information including its name, accession number, and a brief description of its function.
