# Supplementary material for: Biobased, biodegradable but not bio-neutral: about the effects of polylactic acid nanoparticles on macrophages
Source: Royal Society of Chemistry journal article supplement (doi:10.1039/d4en00335g), 2024-01-01
Supplement: d4en00335g4.pdf [file d4en00335g4.pdf]

Supplementary Table 3: results of the pathway analysis by the David tool on the proteins modulated in response to PLA beads

| Annotation Cluster 1     | Enrichment Score:<br>9.368300008141553        | Count | %         | PValue      | Genes                                                                                                                                                                                                                                                  | FDR           |
|--------------------------|-----------------------------------------------|-------|-----------|-------------|--------------------------------------------------------------------------------------------------------------------------------------------------------------------------------------------------------------------------------------------------------|---------------|
| Category                 | Term                                          |       |           |             |                                                                                                                                                                                                                                                        |               |
| GOTERM_BP_DIRECT         | GO:0006412~translation                        | 31    | 8.7078652 | 1.75093E-16 | P62918, Q9D7S7, P62717, O70194, Q9DC44, P19253, P62281, P14115, Q8K0D5, Q61035, P67984, P62751, P62274, Q9DIR9, Q8C0D5, P62270, Q8IZQ9, P63276, O55142, Q8BP47, P61255, P58252, Q9D8E6, P62900, P60229, Q9JHW4, Q99KK9, P47964, P41105, P60843, Q9CQE3 | 3.4090576E-13 |
| GOTERM_BP_DIRECT         | GO:0002181~cytoplasmic translation            | 19    | 5.3370787 | 1.30116E-15 | P62918, Q9D7S7, P62717, Q9DIR9, P19253, P62281, P62270, P14115, P63276, O55142, P67984, P62751, P61255, Q9D8E6, P62274, P62900, Q9CQK7, P41105, P47964                                                                                                 | 1.266679E-12  |
| GOTERM_CC_DIRECT         | GO:0022626~cytosolic ribosome                 | 16    | 4.494382  | 5.6014E-13  | P62918, P62717, Q9DIR9, P19253, P62281, P62270, P14115, P63276, O55142, P67984, P62751, P61255, Q9D8E6, P62900, P41105, P47964                                                                                                                         | 8.1220271E-11 |
| GOTERM_CC_DIRECT         | GO:0005840~ribosome                           | 21    | 5.8988764 | 5.78761E-12 | P62918, P11928, Q9D7S7, P62717, Q9DIR9, P19253, P35564, P62281, P62270, P14115, P63276, O55142, P67984, P62751, P61255, Q9D8E6, P62274, P62900, P41105, P47964, Q9CQE3                                                                                 | 6.2940266E-10 |
| GOTERM_CC_DIRECT         | GO:0022625~cytosolic large ribosomal subunit  | 13    | 3.6516854 | 2.69666E-10 | P62918, P62717, Q9DIR9, P19253, P14115, O55142, P67984, P62751, P61255, Q9D8E6, P62900, P41105, P47964                                                                                                                                                 | 1.6757841E-08 |
| GOTERM_MF_DIRECT         | GO:0003735~structural constituent of ribosome | 19    | 5.3370787 | 8.67998E-10 | P62918, Q9D7S7, P62717, Q9DIR9, P19253, P62281, P62270, P14115, P63276, O55142, P67984, P62751, P61255, Q9D8E6, P62274, P62900, P41105, P47964, Q9CQE3                                                                                                 | 1.9124894E-07 |
| KEGG_PATHWAY             | mmu05171:Coronavirus disease - COVID-19       | 25    | 7.0224719 | 2.29093E-09 | P62918, P11928, Q9D7S7, P62717, Q8BT19, P19253, P62281, P14115, P67984, P62751, P62274, P98086, P42227, Q8V193, Q9DIR9, P62270, P30993, P63276, O55142, P61255, Q61093, Q9D8E6, P62900, P47964, P41105                                                 | 5.7044048E-07 |
| UP_KW_MOLECULAR_FUNCTION | KW-0687~Ribonucleoprotein                     | 24    | 6.741573  | 5.13169E-09 | P62918, Q9D7S7, P62717, Q9DIR9, P19253, P62281, Q9D7A6, P62270, P14115, Q62376, Q3UEB3, P63276, O55142, P67984, P62751, P61255, Q9D8E6, P62274, P62900, Q9QXK7, Q9D0E1, P41105, P47964, Q9CQE3                                                         | 2.6541449E-07 |
| UP_KW_MOLECULAR_FUNCTION | KW-0689~Ribosomal protein                     | 19    | 5.3370787 | 8.04286E-09 | P62918, Q9D7S7, P62717, Q9DIR9, P19253, P62281, P62270, P14115, P63276, O55142, P67984, P62751, P61255, Q9D8E6, P62274, P62900, P41105, P47964, Q9CQE3                                                                                                 | 2.6541449E-07 |

| KEGG_PATHWAY         | mmu03010:Ribosome                      | 19    | 5.3370787 | 1.11694E-07 | P62918, Q9D7S7, P62717, Q9DIR9, P19253, P62281, P62270, P14115, P63276, O55142, P67984, P62751, P61255, Q9D8E6, P62274, P62900, P41105, P47964, Q9CQE3                                                                                                                                                                                                                                                                                                                                                                         | 9.2706324E-06 |
|----------------------|----------------------------------------|-------|-----------|-------------|--------------------------------------------------------------------------------------------------------------------------------------------------------------------------------------------------------------------------------------------------------------------------------------------------------------------------------------------------------------------------------------------------------------------------------------------------------------------------------------------------------------------------------|---------------|
| GOTERM_CC_DIRECT     | GO:0098793~presynapse                  | 18    | 5.0561798 | 6.35201E-07 | P62918, Q9DIR9, P19253, Q9CR95, P35564, P62281, P14115, Q64324, O55142, P67984, P62751, P61255, O08992, Q9D8E6, P61028, P41105, P47964, P49615                                                                                                                                                                                                                                                                                                                                                                                 | 2.7631264E-05 |
| GOTERM_CC_DIRECT     | GO:0045202~synapse                     | 35    | 9.8314607 | 3.56897E-06 | P62918, Q61235, P62717, Q5SSL4, O70194, Q9DCH4, P19253, P10852, P62281, P14115, P67984, O35864, P70704, P62751, P50518, O08992, G5E829, P49615, P98086, P57716, Q9DIR9, P35564, Q64430, P62270, Q81ZQ9, P63276, O55101, O55142, P61255, P58252, Q9D8E6, P62900, Q9D0E1, P47964, P41105                                                                                                                                                                                                                                         | 0.00011942339 |
| GOTERM_CC_DIRECT     | GO:0098794~postsynapse                 | 17    | 4.7752809 | 3.93723E-06 | P62918, Q9DIR9, P19253, P62281, P62270, P14115, P63276, O55142, P67984, P62751, P61255, Q9D8E6, P62900, P98086, P41105, P47964, P49615                                                                                                                                                                                                                                                                                                                                                                                         | 0.00012233546 |
| Annotation Cluster 2 | Enrichment Score:<br>6.992234447958213 |       |           |             |                                                                                                                                                                                                                                                                                                                                                                                                                                                                                                                                |               |
| Category             | Term                                   | Count | %         | PValue      | Genes                                                                                                                                                                                                                                                                                                                                                                                                                                                                                                                          | FDR           |
| GOTERM_MF_DIRECT     | GO:0000166~nucleotide binding          | 64    | 17.977528 | 5.94397E-11 | Q8CG48, Q8BT19, O70133, P46471, P70388, P37913, P11440, Q8K0D5, Q61035, Q8VEH6, P70704, P61222, P61028, P09411, P48722, P61027, P56480, P49615, P28650, Q9WUK4, Q64430, P70698, P35601, Q8BP47, P09581, Q9WTT7, P06795, E9Q634, Q9JIY4, O70551, Q2NL51, Q9CY64, O08528, P50516, P70248, P36371, Q8VDD5, Q91V92, Q04899, P61087, P04184, G5E829, P62334, Q8C111, P80314, Q8V193, Q9CZ30, Q8C0D5, Q6ZQB6, Q04692, O35379, P58252, O09110, P24547, Q9EPE9, Q9Z110, Q9DIG2, P63038, Q9WUA3, P80318, Q9JHW4, Q99KK9, P60843, Q3UFY7 | 1.9644822E-08 |
| GOTERM_MF_DIRECT     | GO:0005524~ATP binding                 | 53    | 14.88764  | 4.83696E-08 | Q8CG48, P11928, Q8BT19, O70133, P46471, P70388, P37913, P11440, Q61035, P70704, P61222, P09411, P48722, P56480, P49615, Q9WUK4, Q64430, P70698, P35601, Q8BP47, P09581, Q9WTT7, P06795, E9Q634, Q9JIY4, O70551, Q2NL51, O08528, P50516, P70248, P36371, Q8VDD5, Q91V92, Q04899, P61087, P04184, G5E829, P62334, P80314, Q8V193, Q9CZ30, Q6ZQB6, Q04692, O35379, O09110, Q9EPE9, Q9Z110, Q9DIG2, P63038, Q9WUA3, P80318, Q99KK9, P60843                                                                                         | 6.3944586E-06 |

| Annotation Cluster 3 | Enrichment Score:<br>5.913199641887708                        | Count | %         | PValue      | Genes                                                                                                                                                                                                                                                                                                                                                                                                                                                                                                                                                                                                          | FDR           |
|----------------------|---------------------------------------------------------------|-------|-----------|-------------|----------------------------------------------------------------------------------------------------------------------------------------------------------------------------------------------------------------------------------------------------------------------------------------------------------------------------------------------------------------------------------------------------------------------------------------------------------------------------------------------------------------------------------------------------------------------------------------------------------------|---------------|
| UP_KW_LIGAND         | KW-0547~Nucleotide-binding                                    | 63    | 17.696629 | 2.08501E-07 | Q8CG48, P11928, Q8BT19, O70133, P46471, P70388, P37913, P11440, Q8K0D5, Q61035, Q8VEH6, P70704, P61222, P61028, P09411, P48722, P61027, P56480, P49615, P28650, Q9WUK4, Q64430, P70698, P35601, Q8BP47, P09581, Q9WTT7, P06795, E9Q634, Q9JYY4, O70551, Q2NL51, O08528, P50516, P70248, P36371, Q8VDD5, Q91V92, Q04899, P61087, P04184, G5E829, P62334, Q8C111, P80314, Q8VI93, Q9CZ30, Q8C0D5, Q6ZQB6, Q04692, O35379, P58252, O09110, Q9EPE9, Q9Z110, Q9D1G2, P63038, Q9WUA3, P80318, Q9JHW4, Q99KK9, P60843, Q3UPLY7                                                                                        | 4.5599432E-06 |
| UP_KW_LIGAND         | KW-0067~ATP-binding                                           | 53    | 14.88764  | 3.64795E-07 | Q8CG48, P11928, Q8BT19, O70133, P46471, P70388, P37913, P11440, Q61035, P70704, P61222, P09411, P48722, P56480, P49615, Q9WUK4, Q64430, P70698, P35601, Q8BP47, P09581, Q9WTT7, P06795, E9Q634, Q9JYY4, O70551, Q2NL51, O08528, P50516, P70248, P36371, Q8VDD5, Q91V92, Q04899, P61087, P04184, G5E829, P62334, P80314, Q8VI93, Q9CZ30, Q6ZQB6, Q04692, O35379, O09110, Q9EPE9, Q9Z110, Q9D1G2, P63038, Q9WUA3, P80318, Q99KK9, P60843, P80314, Q8CG48, P46471, O70133, Q9CZ30, P70388, Q9WUK4, Q64430, P35601, Q04692, P70704, P48722, Q9EPE9, G5E829, P56480, P62334, P63038, P80318, E9Q634, Q9JYY4, P60843 | 4.5599432E-06 |
| GOTERM_MF_DIRECT     | GO:0016887~ATPase activity                                    | 21    | 5.8988764 | 1.0894E-06  | Q8CG48, O70133, P46471, P50516, P70388, P70248, Q8K0D5, P36371, Q8VDD5, P61222, P61028, P04184, P61027, P62334, P56480, Q8C111, P28650, Q9CZ30, Q8C0D5, Q9WUK4, P70698, P35601, Q04692, O35379, P58252, Q9WTT7, Q9D1G2, P06795, Q9JYY4, Q9JHW4, E9Q634, P60843                                                                                                                                                                                                                                                                                                                                                 | 0.00012001558 |
| INTERPRO             | IPR027417:P-loop containing nucleoside triphosphate hydrolase | 33    | 9.2696629 | 4.67304E-06 | Q8CG48, O70133, P46471, Q9JKF1, P50516, P70388, P70248, Q8K0D5, P36371, Q8VDD5, P61222, P61028, P04184, P61027, P62334, P56480, Q8C111, P28650, Q9CZ30, Q8C0D5, Q9WUK4, P70698, P35601, Q04692, O35379, P58252, Q9WTT7, Q9D1G2, P06795, Q9JYY4, Q9JHW4, E9Q634, P60843                                                                                                                                                                                                                                                                                                                                         | 0.00165425601 |
| UP_KW_DOMAIN         | KW-0809~Transit peptide                                       | 25    | 7.0224719 | 5.08189E-08 | Q8K3J1, Q8K0D5, P42125, Q9CZB0, Q9CZ13, P56383, P45952, P56480, P08249, Q9DB77, Q9D6R2, Q9CYR0, P53395, Q8CG76, O08715, Q8BMF4, Q9JH15, Q8C0I1, P20108, Q9CQA3, O09111, Q99K10, P63038, Q99KK9, Q9CQE3                                                                                                                                                                                                                                                                                                                                                                                                         | 1.0671968E-06 |
| UP_SEQ_FEATURE       | TRANSIT:Mitochondrion                                         | 24    | 6.741573  | 5.09651E-07 | Q9D6R2, Q8K3J1, Q9CYR0, P53395, Q8CG76, O08715, Q9JH15, Q8BMF4, Q8K0D5, P20108, P42125, Q9CQA3, O09111, Q9CZB0, Q99K10, Q9CZ13, P56383, P45952, P56480, P63038, P08249, Q9DB77, Q99KK9, Q9CQE3                                                                                                                                                                                                                                                                                                                                                                                                                 | 0.00016376794 |

| Annotation Cluster           | Enrichment Score:                                                             | Count | %         | PValue      | Genes                                                                                                                                                                                                                                                                                                                                                                                                                                                                                                                                                                                                                                                                                                                                                                                                                                  | FDR           |
|------------------------------|-------------------------------------------------------------------------------|-------|-----------|-------------|----------------------------------------------------------------------------------------------------------------------------------------------------------------------------------------------------------------------------------------------------------------------------------------------------------------------------------------------------------------------------------------------------------------------------------------------------------------------------------------------------------------------------------------------------------------------------------------------------------------------------------------------------------------------------------------------------------------------------------------------------------------------------------------------------------------------------------------|---------------|
| UP_KW_CELLULAR_CO<br>MPONENT | KW-0496~Mitochondrion                                                         | 39    | 10.955056 | 7.03239E-05 | P11928, Q8K3J1, O08528, P11440, Q8K0D5, P42125, P61222, Q9CZB0, Q9CZ13, Q9DCZ4, P56383, P45952, P56480, P08249, Q8R1I1, Q9DB77, P62897, Q9D6R2, Q921M7, Q9QZD8, Q9CZR0, P53395, Q8CG76, O08715, Q8BMF4, Q9JH15, O08734, P20108, Q8BGE6, Q9CQA3, O09111, Q07813, Q99K10, Q9Z110, P63038, P60603, Q99KK9, Q9CQE3, P00397                                                                                                                                                                                                                                                                                                                                                                                                                                                                                                                 | 0.00093765164 |
| Annotation Cluster 4         | 4.82314446763019905                                                           |       |           |             |                                                                                                                                                                                                                                                                                                                                                                                                                                                                                                                                                                                                                                                                                                                                                                                                                                        |               |
| Category                     | Term                                                                          |       |           |             |                                                                                                                                                                                                                                                                                                                                                                                                                                                                                                                                                                                                                                                                                                                                                                                                                                        | FDR           |
| KEGG_PATHWAY                 | mmu01200:Carbon metabolism                                                    | 16    | 4.494382  | 1.062E-07   | Q9D6R2, P06801, P06745, Q9R0P3, O08528, Q8BMF4, P47968, Q9CQA3, P40142, Q9CZB0, Q99K10, P05063, P09411, Q9WUA3, P08249, P05201                                                                                                                                                                                                                                                                                                                                                                                                                                                                                                                                                                                                                                                                                                         | 9.2706324E-06 |
| UP_KW_BIOLOGICAL_P<br>ROCESS | KW-0816~Tricarboxylic acid cycle                                              | 6     | 1.6853933 | 4.609E-05   | Q9D6R2, Q9CQA3, Q9CZB0, Q99K10, Q8BMF4, P08249                                                                                                                                                                                                                                                                                                                                                                                                                                                                                                                                                                                                                                                                                                                                                                                         | 0.0013366095  |
| KEGG_PATHWAY                 | mmu00020:Citrate cycle (TCA cycle)                                            | 7     | 1.9662921 | 7.72258E-05 | Q9D6R2, Q9CQA3, Q91V92, Q9CZB0, Q99K10, Q8BMF4, P08249                                                                                                                                                                                                                                                                                                                                                                                                                                                                                                                                                                                                                                                                                                                                                                                 | 0.00197905107 |
| GOTERM_BP_DIRECT             | GO:0006099~tricarboxylic acid cycle                                           | 6     | 1.6853933 | 0.000134874 | Q9D6R2, Q9CQA3, Q9CZB0, Q99K10, Q8BMF4, P08249                                                                                                                                                                                                                                                                                                                                                                                                                                                                                                                                                                                                                                                                                                                                                                                         | 0.0437664787  |
| Annotation Cluster 5         | Enrichment Score:<br>4.704741333913531                                        |       |           |             |                                                                                                                                                                                                                                                                                                                                                                                                                                                                                                                                                                                                                                                                                                                                                                                                                                        |               |
| Category                     | Term                                                                          | Count | %         | PValue      | Genes                                                                                                                                                                                                                                                                                                                                                                                                                                                                                                                                                                                                                                                                                                                                                                                                                                  | FDR           |
| UP_SEQ_FEATURE               | CROSSLNK:Glycyl lysine isopeptide (Lys-Gly) (interchain with G-Cter in SUMO2) | 36    | 10.11236  | 2.6101E-07  | P62918, P09405, P62717, O70133, Q3U1J4, P14733, P10852, P97822, P11440, P62751, O35226, P40142, Q99JF8, P62996, Q8C1I1, Q9DBE9, P80314, Q60973, Q9DIR9, Q6PDM2, Q99020, P62270, Q62376, Q8CGZ0, Q91VE6, Q3UEB3, P35601, Q04692, P61255, Q9D8E6, P24547, Q9D0E1, P63038, P80318, P41105, P60843, P62918, P09405, Q8BL97, P62717, O70133, P46471, Q3U1J4, Q9JMH6, P97822, P11440, Q9QY76, Q80U87, Q9R0L6, P62751, P61222, P61027, A1L314, P84228, P62996, P06745, Q91YQ5, Q9DIR9, Q6PDM2, P35564, Q9CQ71, Q62376, P35601, P14685, Q61093, P09581, Q9QXK7, P14733, P10852, Q8VDD5, O35226, P40142, Q91V92, P61087, P17095, P04184, Q99JF8, Q8C1I1, Q9DBE9, P80314, Q60972, Q60973, Q921M7, Q99020, P36993, P62270, Q8CGZ0, Q91VE6, Q3UEB3, Q04692, P63276, Q8BGE6, P58252, P61255, Q9D8E6, P24547, Q9D0E1, P63038, P80318, P41105, P60843 | 0.00012580665 |
| UP_KW_PTM                    | KW-0832~Ubl conjugation                                                       | 73    | 20.505618 | 0.000159532 |                                                                                                                                                                                                                                                                                                                                                                                                                                                                                                                                                                                                                                                                                                                                                                                                                                        | 0.00066462281 |

|           |                         |    |           |             |                                                                                                                                                                                                                                                                                                                                                                                                                                                |               |
|-----------|-------------------------|----|-----------|-------------|------------------------------------------------------------------------------------------------------------------------------------------------------------------------------------------------------------------------------------------------------------------------------------------------------------------------------------------------------------------------------------------------------------------------------------------------|---------------|
| UP_KW_PTM | KW-1017~Isopeptide bond | 54 | 15.168539 | 0.000184617 | P62918, P09405, Q8BL97, P62717, P62717, 070133, Q3U114, P97822, P11440, Q9QY76, P62751, P61027, P62996, Q91YQ5, Q9DIR9, Q6PDM2, Q9CQ71, Q62376, P35601, P14685, Q61093, Q9QXK7, P14733, P10852, Q35226, P40142, Q91V92, P61087, P17095, Q99JF8, Q8C111, Q9DBE9, P80314, Q60972, Q60973, Q921M7, Q99020, P36993, P62270, Q8CGZ0, Q91VE6, Q3UEB3, Q04692, P63276, Q8BGE6, P58252, P61255, Q9D8E6, P24547, Q9D0E1, P63038, P80318, P41105, P60843 | 0.00066462281 |
|-----------|-------------------------|----|-----------|-------------|------------------------------------------------------------------------------------------------------------------------------------------------------------------------------------------------------------------------------------------------------------------------------------------------------------------------------------------------------------------------------------------------------------------------------------------------|---------------|

|                      |                                       |       |   |        |                                                                                                                                                                                                                                                                                                                                                                                                        |     |
|----------------------|---------------------------------------|-------|---|--------|--------------------------------------------------------------------------------------------------------------------------------------------------------------------------------------------------------------------------------------------------------------------------------------------------------------------------------------------------------------------------------------------------------|-----|
| Annotation Cluster 6 | Enrichment Score:<br>4.24596503935281 | Count | % | PValue | Genes                                                                                                                                                                                                                                                                                                                                                                                                  | FDR |
| Category             | Term                                  |       |   |        | Q60664, P11928, Q9JLJ5, P14115, O08547, Q9QY76, O08795, P70704, O08992, P62274, P61027, Q9DCZ4, O88455, Q8BHN3, Q91YQ5, Q9DIR9, O08715, P35564, P17439, Q64430, Q8R180, Q9DB25, O54692, Q9JK23, Q07813, Q61093, Q9DBS1, Q9WV55, O70551, Q9CPU4, P36371, Q6ZWQ7, Q9JHP7, P35441, Q9WU81, Q9EQH2, P57716, Q8CGZ0, O08734, P97858, P35821, Q8VDP6, Q6P5E4, Q8BGE6, Q8R1V4, B9EJ86, Q9EPE9, O70503, P47964 |     |

|                  |                                  |    |           |             |                                                                                                                                                                                                                                                                                                                                                                                                                                                                                                                                                        |               |
|------------------|----------------------------------|----|-----------|-------------|--------------------------------------------------------------------------------------------------------------------------------------------------------------------------------------------------------------------------------------------------------------------------------------------------------------------------------------------------------------------------------------------------------------------------------------------------------------------------------------------------------------------------------------------------------|---------------|
| GOTERM_CC_DIRECT | GO:0005783~endoplasmic reticulum | 49 | 13.764045 | 1.88325E-06 | Q60664, P11928, Q9WV55, O70551, Q9JLJ5, O08547, Q9QY76, Q9CPU4, O08795, P36371, P70704, Q6ZWQ7, Q9JHP7, P35441, O08992, P62274, P61027, Q9DCZ4, Q9WU81, O88455, Q8BHN3, Q9EQH2, Q9DIR9, Q91YQ5, O08715, P35564, Q8CGZ0, P97858, Q8R180, P35821, Q8VDP6, Q6P5E4, Q8BGE6, Q9DB25, O54692, Q9JK23, Q91K23, Q8R1V4, B9EJ86, Q9EPE9, O70503, Q9DBS1, Q60664, Q9WV55, Q9JLJ5, O08547, Q9QY76, Q9CPU4, P36371, P40142, O08992, P61027, Q9DCZ4, Q9WU81, O88455, Q9EQH2, Q91YQ5, P35564, P97858, Q8R180, Q8VDP6, Q9DB25, O54692, Q07813, Q8R1V4, B9EJ86, Q9EPE9 | 0.00025280251 |
|------------------|----------------------------------|----|-----------|-------------|--------------------------------------------------------------------------------------------------------------------------------------------------------------------------------------------------------------------------------------------------------------------------------------------------------------------------------------------------------------------------------------------------------------------------------------------------------------------------------------------------------------------------------------------------------|---------------|

|                           |                               |    |           |             |                                                                                                                                                                                                                                                                                                                                                                                                                                                                                                                                                |               |
|---------------------------|-------------------------------|----|-----------|-------------|------------------------------------------------------------------------------------------------------------------------------------------------------------------------------------------------------------------------------------------------------------------------------------------------------------------------------------------------------------------------------------------------------------------------------------------------------------------------------------------------------------------------------------------------|---------------|
| UP_KW_CELLULAR_CO_MPONENT | KW-0256~Endoplasmic reticulum | 41 | 11.516854 | 1.26401E-05 | Q60664, P11928, Q9WV55, O70551, Q9JLJ5, O08547, Q9QY76, Q9CPU4, O08795, P36371, P70704, Q6ZWQ7, Q9JHP7, P35441, O08992, P62274, P61027, Q9DCZ4, Q9WU81, O88455, Q8BHN3, Q9EQH2, Q9DIR9, Q91YQ5, O08715, P35564, Q8CGZ0, P97858, Q8R180, P35821, Q8VDP6, Q6P5E4, Q8BGE6, Q9DB25, O54692, Q9JK23, Q8R1V4, B9EJ86, Q9EPE9, O70503, Q9DBS1, Q60664, Q9WV55, Q9JLJ5, O08547, Q9QY76, Q9CPU4, P36371, P40142, O08992, P61027, Q9DCZ4, Q9WU81, O88455, Q9EQH2, Q91YQ5, P35564, P97858, Q8R180, Q8VDP6, Q9DB25, O54692, Q07813, Q8R1V4, B9EJ86, Q9EPE9 | 0.00025280251 |
|---------------------------|-------------------------------|----|-----------|-------------|------------------------------------------------------------------------------------------------------------------------------------------------------------------------------------------------------------------------------------------------------------------------------------------------------------------------------------------------------------------------------------------------------------------------------------------------------------------------------------------------------------------------------------------------|---------------|

|                  |                                           |    |           |             |                                                                                                                                                                                                                                                                                                                                                                                                                                                                                                                                                |               |
|------------------|-------------------------------------------|----|-----------|-------------|------------------------------------------------------------------------------------------------------------------------------------------------------------------------------------------------------------------------------------------------------------------------------------------------------------------------------------------------------------------------------------------------------------------------------------------------------------------------------------------------------------------------------------------------|---------------|
| GOTERM_CC_DIRECT | GO:0005789~endoplasmic reticulum membrane | 25 | 7.0224719 | 0.007681496 | Q60664, P11928, Q9WV55, O70551, Q9JLJ5, O08547, Q9QY76, Q9CPU4, O08795, P36371, P70704, Q6ZWQ7, Q9JHP7, P35441, O08992, P62274, P61027, Q9DCZ4, Q9WU81, O88455, Q8BHN3, Q9EQH2, Q9DIR9, Q91YQ5, O08715, P35564, Q8CGZ0, P97858, Q8R180, P35821, Q8VDP6, Q6P5E4, Q8BGE6, Q9DB25, O54692, Q9JK23, Q8R1V4, B9EJ86, Q9EPE9, O70503, Q9DBS1, Q60664, Q9WV55, Q9JLJ5, O08547, Q9QY76, Q9CPU4, P36371, P40142, O08992, P61027, Q9DCZ4, Q9WU81, O88455, Q9EQH2, Q91YQ5, P35564, P97858, Q8R180, Q8VDP6, Q9DB25, O54692, Q07813, Q8R1V4, B9EJ86, Q9EPE9 | 0.09030948567 |
|------------------|-------------------------------------------|----|-----------|-------------|------------------------------------------------------------------------------------------------------------------------------------------------------------------------------------------------------------------------------------------------------------------------------------------------------------------------------------------------------------------------------------------------------------------------------------------------------------------------------------------------------------------------------------------------|---------------|

Annotation Cluster 7  
Enrichment Score:  
4.186778511904929

|                  |                                    |       |           |             |                                                                                                                                                                                                                        |               |
|------------------|------------------------------------|-------|-----------|-------------|------------------------------------------------------------------------------------------------------------------------------------------------------------------------------------------------------------------------|---------------|
| Category         | Term                               | Count | %         | PValue      | Genes                                                                                                                                                                                                                  | FDR           |
| GOTERM_MF_DIRECT | GO:0016491~oxidoreductase activity | 27    | 7.5842697 | 4.68133E-06 | Q8K3J1, Q9CY64, Q9JMH6, Q8CTK6, Q9ESY9, Q9CPU4, Q9CQF9, P45376, P45377, O88455, P45952, P08249, Q9D6R2, P06801, P08228, P47199, Q8CG76, Q9JH15, Q8R180, Q8C011, P20108, Q9CQA3, Q61093, Q9ZZG9, P24547, Q9Z110, O70503 | 0.00044205154 |

| Category                 | Term                                           | Count | %         | PValue      | Genes                                                                                                                                                                                                                                                                                                                                                                                                                                                                                                                                                                                                                                                                                                 | FDR           |
|--------------------------|------------------------------------------------|-------|-----------|-------------|-------------------------------------------------------------------------------------------------------------------------------------------------------------------------------------------------------------------------------------------------------------------------------------------------------------------------------------------------------------------------------------------------------------------------------------------------------------------------------------------------------------------------------------------------------------------------------------------------------------------------------------------------------------------------------------------------------|---------------|
| UP_KW_MOLECULAR_FUNCTION | KW-0560~Oxidoreductase                         | 27    | 7.5842697 | 8.63966E-05 | Q8K3J1, Q9CXY64, Q9JMH6, Q8C7K6, Q9ESY9, Q9CPU4, Q9COF9, P45376, P45377, Q88455, P45952, P08249, Q9D6R2, P06801, P08228, P47199, Q8CG76, Q9JH15, Q8R180, P20108, Q9CQA3, Q61093, Q9Z2G9, P24547, Q9Z110, Q70503, P00397                                                                                                                                                                                                                                                                                                                                                                                                                                                                               | 0.00095036298 |
| UP_KW_LIGAND             | KW-0521~NADP                                   | 12    | 3.3707865 | 0.000680453 | P06801, P47199, Q61093, Q9CXY64, Q8CG76, Q9Z2G9, Q9JMH6, P45376, Q88455, Q9Z110, P45377, Q70503                                                                                                                                                                                                                                                                                                                                                                                                                                                                                                                                                                                                       | 0.0056704419  |
| Annotation Cluster 8     | Enrichment Score:<br>3.7635340237459953        |       |           |             |                                                                                                                                                                                                                                                                                                                                                                                                                                                                                                                                                                                                                                                                                                       |               |
| GOTERM_MF_DIRECT         | GO:0003723~RNA binding                         | 49    | 13.764045 | 1.10561E-13 | P62918, P09405, Q8BL97, Q9D757, Q6R5N8, O70133, O70194, P62281, Q35295, Q9JKP5, Q08795, P67984, P62751, P84104, Q9CSH3, P17095, P62996, Q8V193, Q60973, P47199, Q8C175, Q6PDM2, Q08715, Q99136, Q99020, Q9D7A6, P62270, Q62376, Q8CGZ0, Q9JH15, Q91VE6, Q3UEB3, Q991X7, Q9CQT2, Q8JZQ9, P70318, Q9CXX8, Q5U4D9, P58252, P61255, Q9D8E6, Q9QXK7, P24547, Q9D0E1, Q91VU7, Q9JY4, P60843, Q9CQE3, P62918, P11928, P09405, Q8BL97, Q6R5N8, O70133, O70194, P62281, Q9JKP5, P67984, P62751, Q9CSH3, P84104, P62996, Q8V193, P47199, Q8C175, Q6PDM2, Q08715, Q9D7A6, Q99020, P62270, Q62376, Q9JH15, Q91VE6, Q3UEB3, Q991X7, Q9CQT2, Q8JZQ9, P70318, Q9CXX8, Q5U4D9, P24547, Q9QXK7, Q9D0E1, P60843, Q9CQE3 | 7.3080929E-11 |
| UP_KW_MOLECULAR_FUNCTION | KW-0694~RNA-binding                            | 37    | 10.393258 | 1.67834E-08 | P09405, Q8BL97, Q6PDM2, Q99020, Q62376, Q9JH15, Q91VE6, Q3UEB3, Q991X7, Q9CQT2, Q8JZQ9, P70318, P84104, Q9D0E1, P62996                                                                                                                                                                                                                                                                                                                                                                                                                                                                                                                                                                                | 3.6923401E-07 |
| UP_SEQ_FEATURE           | DOMAIN:RRM                                     | 15    | 4.2134831 | 2.78508E-06 | P09405, Q8BL97, Q6PDM2, Q99020, Q62376, Q9JH15, P84104, Q9D0E1, P62996                                                                                                                                                                                                                                                                                                                                                                                                                                                                                                                                                                                                                                | 0.00053696315 |
| SMART                    | SM00360:RRM                                    | 14    | 3.9325843 | 9.46225E-06 | P09405, Q8BL97, Q6PDM2, Q99020, Q62376, Q9JH15, Q91VE6, Q3UEB3, Q9CQT2, Q8JZQ9, P70318, P84104, Q9D0E1, P62996                                                                                                                                                                                                                                                                                                                                                                                                                                                                                                                                                                                        | 0.00058665931 |
| INTERPRO                 | IPR012677:Nucleotide-binding, alpha-beta plait | 16    | 4.494382  | 1.18415E-05 | P09405, Q8BL97, Q6PDM2, Q99020, Q62376, Q9JH15, P62751, P84104, Q9D0E1, P62996                                                                                                                                                                                                                                                                                                                                                                                                                                                                                                                                                                                                                        | 0.00279458871 |
| INTERPRO                 | IPR000504:RNA recognition motif domain         | 14    | 3.9325843 | 4.43036E-05 | P09405, Q8BL97, Q6PDM2, Q99020, Q62376, Q9JH15, Q91VE6, Q3UEB3, Q9CQT2, Q8JZQ9, P70318, P84104, Q9D0E1, P62996                                                                                                                                                                                                                                                                                                                                                                                                                                                                                                                                                                                        | 0.0072113923  |
| GOTERM_MF_DIRECT         | GO:0003676~nucleic acid binding                | 23    | 6.4606742 | 7.40358E-05 | P09405, Q8BL97, Q70133, Q3U1J4, Q6PDM2, Q08715, P62270, Q99020, Q62376, Q8CGZ0, Q9JH15, Q91VE6, Q3UEB3, Q991X7, Q9CQT2, Q8JZQ9, P70318, Q8BP47, P84104, Q9D0E1, Q9JY4, P62996, P60843                                                                                                                                                                                                                                                                                                                                                                                                                                                                                                                 | 0.00611720948 |

| Annotation Cluster 9     | Enrichment Score:<br>3.477831332166054               | Count | %         | PValue      | Genes                                                                                                                                                                                          | FDR           |
|--------------------------|------------------------------------------------------|-------|-----------|-------------|------------------------------------------------------------------------------------------------------------------------------------------------------------------------------------------------|---------------|
| Category                 | Term                                                 |       |           |             |                                                                                                                                                                                                |               |
| UP_SEQ_FEATURE           | LIPID:N6-decanoyllysine                              | 8     | 2.247191  | 1.78707E-10 | P84228                                                                                                                                                                                         | 1.7227368E-07 |
| SMART                    | SM00428:H3                                           | 8     | 2.247191  | 6.17874E-10 | P84228                                                                                                                                                                                         | 7.6616402E-08 |
| INTERPRO                 | IPR000164:Histone H3                                 | 8     | 2.247191  | 1.22785E-09 | P84228                                                                                                                                                                                         | 8.693177E-07  |
| UP_KW_PTM                | KW-0164~Citrullination                               | 15    | 4.2134831 | 1.17666E-08 | Q9DBE9, P62751, Q9D8E6, P19253, P62281, P84228, Q99JF8, Q91VE6                                                                                                                                 | 7.0599853E-08 |
| GOTERM_BP_DIRECT         | GO:0040029~regulation of gene expression, epigenetic | 8     | 2.247191  | 2.12865E-06 | P84228                                                                                                                                                                                         | 0.00103612214 |
| UP_SEQ_FEATURE           | DOMAIN:Histone H2A/H2B/H3                            | 8     | 2.247191  | 2.2727E-06  | P84228                                                                                                                                                                                         | 0.00053696315 |
| GOTERM_BP_DIRECT         | GO:0006334~nucleosome assembly                       | 11    | 3.0898876 | 6.53341E-06 | Q60972, Q78ZA7, Q9EST5, P84228                                                                                                                                                                 | 0.00254411153 |
| INTERPRO                 | IPR007125:Histone core                               | 8     | 2.247191  | 9.4574E-05  | P84228                                                                                                                                                                                         | 0.01115973651 |
| GOTERM_CC_DIRECT         | GO:0000785~chromatin                                 | 18    | 5.0561798 | 0.000206828 | Q60972, Q8CG48, Q8BFQ4, O35864, Q78ZA7, O70551, P17095, P70388, P84228, P42227                                                                                                                 | 0.00449850639 |
| UP_KW_CELLULAR_COMPONENT | KW-0544~Nucleosome core                              | 8     | 2.247191  | 0.000616416 | P84228                                                                                                                                                                                         | 0.00616416025 |
| UP_KW_PTM                | KW-0013~ADP-ribosylation                             | 10    | 2.8089888 | 0.000654427 | P17095, P84228                                                                                                                                                                                 | 0.00196328195 |
| UP_SEQ_FEATURE           | LIPID:S-palmitoyl cysteine                           | 12    | 3.3707865 | 0.000909053 | P08228, P35564, P62281, P84228, Q9CPU4                                                                                                                                                         | 0.08763272931 |
| GOTERM_MF_DIRECT         | GO:0046982~protein heterodimerization activity       | 16    | 4.494382  | 0.001136358 | Q9WV55, Q9R1T2, Q07813, O08992, Q61093, Q6IRU2, O08734, P84228, Q9QY76                                                                                                                         | 0.06259440522 |
| UP_KW_PTM                | KW-0379~Hydroxylation                                | 12    | 3.3707865 | 0.001399025 | P62918, P09411, P14115, P84228, P98086                                                                                                                                                         | 0.00314780535 |
| Annotation Cluster 10    | Enrichment Score:<br>3.42643241519865                | Count | %         | PValue      | Genes                                                                                                                                                                                          | FDR           |
| Category                 | Term                                                 |       |           |             |                                                                                                                                                                                                |               |
| KEGG_PATHWAY             | mmu05020:Prion disease                               | 21    | 5.8988764 | 3.51395E-06 | P08228, P46471, Q8BT19, Q8K311, P14685, Q99J14, Q9CQA3, O35226, O09111, Q07813, Q61093, Q9CZB0, Q9CZ13, P56383, P56480, P62334, Q8R111, Q9DB77, P98086, P62897, P00397                         | 0.00021874329 |
| UP_KW_BIOLOGICAL_PROCESS | KW-0249~Electron transport                           | 11    | 3.0898876 | 1.16712E-05 | Q9CQA3, O09111, Q61093, Q9CZB0, Q8K311, Q9CZ13, Q8R111, Q9DB77, Q8R180, P62897, P00397                                                                                                         | 0.00061912631 |
| KEGG_PATHWAY             | mmu05014:Amyotrophic lateral sclerosis               | 24    | 6.741573  | 1.31115E-05 | P08228, Q8BL97, Q8R0G9, P46471, Q8K311, Q99JX7, P14685, Q9QY76, Q99J14, Q9CQA3, O35226, O09111, Q07813, O09110, Q9CZB0, P84104, Q9CZ13, P56383, P56480, P62334, Q8R111, Q9DB77, P62897, P00397 | 0.00065295464 |
| KEGG_PATHWAY             | mmu00190:Oxidative phosphorylation                   | 13    | 3.6516854 | 6.3789E-05  | Q8K311, P50516, Q9CQA3, O09111, P50518, Q9CZB0, Q9CZ13, P56383, P56480, Q8R111, Q9DB77, P62897, P00397                                                                                         | 0.00197905107 |

|                           |                                                            |                                        |           |             |                                                                                                                                                                                                |               |
|---------------------------|------------------------------------------------------------|----------------------------------------|-----------|-------------|------------------------------------------------------------------------------------------------------------------------------------------------------------------------------------------------|---------------|
| KEGG_PATHWAY              | mmu05010:Alzheimer disease                                 | 23                                     | 6.4606742 | 7.06135E-05 | P57716, Q91ZX7, P46471, Q8BT19, Q8K3J1, Q9CR16, P14685, Q99J14, Q9CQA3, O35226, P11152, O09111, Q61093, Q9CZB0, Q9CZ13, P56383, P56480, P62334, Q8R111, Q9DB77, P62897, P49615, P00397         | 0.00197905107 |
| KEGG_PATHWAY              | mmu05012:Parkinson disease                                 | 18                                     | 5.0561798 | 0.000125524 | P08228, P46471, Q8K3J1, P14685, Q99J14, Q9CQA3, O35226, O09111, Q07813, Q9CZB0, Q9CZ13, P56383, P56480, P62334, Q8R111, Q9DB77, P62897, P00397                                                 | 0.00284141034 |
| KEGG_PATHWAY              | mmu05016:Huntington disease                                | 19                                     | 5.3370787 | 0.000208078 | P08228, P46471, Q8K3J1, P17426, P14685, Q99J14, Q9CQA3, O35226, O09111, Q07813, Q9CZB0, Q9CZ13, P56383, P56480, P62334, Q8R111, Q9DB77, P62897, P00397                                         | 0.00431762676 |
| GOTERM_CC_DIRECT          | GO:0070469~respiratory chain                               | 7                                      | 1.9662921 | 0.000243472 | O09111, Q8K3J1, Q9CZ13, Q8R111, Q9DB77, P62897, P00397                                                                                                                                         | 0.00504335103 |
| KEGG_PATHWAY              | mmu05022:Pathways of neurodegeneration - multiple diseases | 24                                     | 6.741573  | 0.000525299 | P08228, P46471, Q8K3J1, Q9CR16, O08734, P14685, Q9QY76, Q99J14, Q9CQA3, O35226, O09111, Q07813, O09110, Q61093, Q9CZB0, Q9CZ13, P56383, P56480, P62334, Q8R111, Q9DB77, P62897, P49615, P00397 | 0.01006149919 |
| KEGG_PATHWAY              | mmu05208:Chemical carcinogenesis - reactive oxygen species | 15                                     | 4.2134831 | 0.000613365 | Q60631, P08228, Q8BT19, Q8K3J1, P35821, Q9CPU4, Q9CQA3, O09111, Q9CZB0, Q9CZ13, P56383, P56480, Q8R111, Q9DB77, P00397                                                                         | 0.01090913552 |
| UP_KW_BIOLOGICAL_P ROCESS | KW-0679~Respiratory chain                                  | 7                                      | 1.9662921 | 0.000616075 | O09111, Q8K3J1, Q9CZ13, Q8R111, Q9DB77, P62897, P00397                                                                                                                                         | 0.01071970068 |
| KEGG_PATHWAY              | mmu04932:Non-alcoholic fatty liver disease                 | 12                                     | 3.3707865 | 0.000951092 | Q9CQA3, O09111, Q07813, Q8BT19, Q9CZB0, Q2NL51, Q8K3J1, Q9CZ13, Q8R111, Q9DB77, P62897, P00397                                                                                                 | 0.01480136181 |
| GOTERM_CC_DIRECT          | GO:0005743~mitochondrial inner membrane                    | 18                                     | 5.0561798 | 0.001485937 | Q9QZD8, Q8K3J1, P42125, Q9CQA3, O09111, Q9CZB0, Q9CZ13, Q9DCZ4, Q9Z110, P56480, P63038, P60603, P08249, Q8R111, Q9DB77, P42227, P00397, Q9CQE3                                                 | 0.02394009673 |
| UP_KW_CELLULAR_CO MPONENT | KW-0999~Mitochondrion inner membrane                       | 13                                     | 3.6516854 | 0.005255569 | Q9QZD8, Q8K3J1, Q9CQA3, O09111, Q9CZB0, Q9CZ13, Q9DCZ4, Q9Z110, P56480, P60603, Q8R111, Q9DB77, P00397                                                                                         | 0.03003182093 |
| Annotation Cluster 11     |                                                            | Enrichment Score:<br>3.082004013922556 |           |             |                                                                                                                                                                                                |               |
| Category                  | Term                                                       | Count                                  | %         | PValue      | Genes                                                                                                                                                                                          | FDR           |
| UP_KW_BIOLOGICAL_P ROCESS | KW-0249~Electron transport                                 | 11                                     | 3.0898876 | 1.16712E-05 | Q9CQA3, O09111, Q61093, Q9CZB0, Q8K3J1, Q9CZ13, Q8R111, Q9DB77, Q8R180, P62897, P00397                                                                                                         | 0.00061912631 |
| GOTERM_CC_DIRECT          | GO:0070469~respiratory chain                               | 7                                      | 1.9662921 | 0.000243472 | O09111, Q8K3J1, Q9CZ13, Q8R111, Q9DB77, P62897, P00397                                                                                                                                         | 0.00504335103 |
| GOTERM_CC_DIRECT          | GO:0005750~mitochondrial respiratory chain complex III     | 4                                      | 1.1235955 | 0.000564085 | Q9CZ13, Q8R111, Q9DB77, P00397                                                                                                                                                                 | 0.01066855759 |
| UP_KW_BIOLOGICAL_P ROCESS | KW-0679~Respiratory chain                                  | 7                                      | 1.9662921 | 0.000616075 | O09111, Q8K3J1, Q9CZ13, Q8R111, Q9DB77, P62897, P00397                                                                                                                                         | 0.01071970068 |



|                              |                                                                         |                                          |           |              |                                                                                                |               |  |  |  |
|------------------------------|-------------------------------------------------------------------------|------------------------------------------|-----------|--------------|------------------------------------------------------------------------------------------------|---------------|--|--|--|
| Annotation Cluster 12        |                                                                         | Enrichment Score:<br>2.64491711107640685 |           |              |                                                                                                |               |  |  |  |
| Category                     | Term                                                                    | Count                                    | %         | PValue       | Genes                                                                                          | FDR           |  |  |  |
| UP_KW_BIOLOGICAL_P<br>ROCESS | KW-0648~Protein<br>biosynthesis                                         | 12                                       | 3.3707865 | 1.423228E-05 | P58252, Q8BP47, Q9DCH4, O70194, Q8C0D5, P60229, Q8K0D5, Q9JHW4, P60843, Q99KK9, Q61035, Q8JZQ9 | 0.00061912631 |  |  |  |
| GOTERM_CC_DIRECT             | GO:0033290~eukaryotic 48S<br>preinitiation complex                      | 4                                        | 1.1235955 | 0.001130424  | Q9DCH4, O70194, P60229, Q8JZQ9                                                                 | 0.02048892849 |  |  |  |
| GOTERM_CC_DIRECT             | GO:0005852~eukaryotic<br>translation initiation factor 3<br>complex     | 4                                        | 1.1235955 | 0.001376767  | Q9DCH4, O70194, P60229, Q8JZQ9                                                                 | 0.02394009673 |  |  |  |
| GOTERM_BP_DIRECT             | GO:001732~formation of<br>cytoplasmic translation<br>initiation complex | 4                                        | 1.1235955 | 0.001561436  | Q9DCH4, O70194, P60229, Q8JZQ9                                                                 | 0.19318868947 |  |  |  |
| GOTERM_CC_DIRECT             | GO:0016282~eukaryotic 43S<br>preinitiation complex                      | 4                                        | 1.1235955 | 0.001654348  | Q9DCH4, O70194, P60229, Q8JZQ9                                                                 | 0.02570147671 |  |  |  |
| Annotation Cluster 13        |                                                                         | Enrichment Score:<br>2.5479359384965816  |           |              |                                                                                                |               |  |  |  |
| Category                     | Term                                                                    | Count                                    | %         | PValue       | Genes                                                                                          | FDR           |  |  |  |
| GOTERM_MF_DIRECT             | GO:0017124~SH3 domain<br>binding                                        | 9                                        | 2.5280899 | 0.001030467  | Q60631, Q9WU78, P29351, Q8BJJ7, Q5FWK3, Q6P549, Q8BHL5, Q8BPJ7, Q80U87                         | 0.06192171506 |  |  |  |
| Annotation Cluster 14        |                                                                         | Enrichment Score:<br>2.420377273906477   |           |              |                                                                                                |               |  |  |  |
| Category                     | Term                                                                    | Count                                    | %         | PValue       | Genes                                                                                          | FDR           |  |  |  |
| GOTERM_CC_DIRECT             | GO:0022624~proteasome<br>accessory complex                              | 5                                        | 1.4044944 | 8.13869E-05  | Q99JI4, O35226, P46471, P62334, P14685                                                         | 0.00208254785 |  |  |  |
| UP_KW_CELLULAR_CO<br>MPONENT | KW-0647~Proteasome                                                      | 6                                        | 1.6853933 | 0.001433291  | Q99JI4, O35226, P46471, P54728, P62334, P14685                                                 | 0.01146632984 |  |  |  |
| GOTERM_CC_DIRECT             | GO:0000502~proteasome<br>complex                                        | 6                                        | 1.6853933 | 0.001850621  | Q99JI4, O35226, P46471, P54728, P62334, P14685                                                 | 0.02775930834 |  |  |  |
| Annotation Cluster 15        |                                                                         | Enrichment Score:<br>2.1450240188303296  |           |              |                                                                                                |               |  |  |  |
| Category                     | Term                                                                    | Count                                    | %         | PValue       | Genes                                                                                          | FDR           |  |  |  |
| UP_KW_BIOLOGICAL_P<br>ROCESS | KW-0324~Glycolysis                                                      | 5                                        | 1.4044944 | 0.0022224592 | P06745, P05063, O08528, P09411, Q9WUA3                                                         | 0.03225658557 |  |  |  |
| Annotation Cluster 16        |                                                                         | Enrichment Score:<br>1.7525834387892805  |           |              |                                                                                                |               |  |  |  |
| Category                     | Term                                                                    | Count                                    | %         | PValue       | Genes                                                                                          | FDR           |  |  |  |

|                           |                                                                   |       |           |             |                                                                                                                                |               |
|---------------------------|-------------------------------------------------------------------|-------|-----------|-------------|--------------------------------------------------------------------------------------------------------------------------------|---------------|
| UP_KW_LIGAND              | KW-0274~FAD                                                       | 8     | 2.247191  | 0.009548578 | Q8C0I1, Q9CQF9, Q61093, Q9JMH6, Q8C7K6, P45952, Q9JH15, Q8R180                                                                 | 0.05412698994 |
| UP_KW_LIGAND              | KW-0285~Flavoprotein                                              | 8     | 2.247191  | 0.010825398 | Q8C0I1, Q9CQF9, Q61093, Q9JMH6, Q8C7K6, P45952, Q9JH15, Q8R180                                                                 | 0.05412698994 |
| Annotation Cluster 17     | Enrichment Score:<br>1.6746771580234787                           |       |           |             |                                                                                                                                |               |
| Category                  | Term                                                              | Count | %         | PValue      | Genes                                                                                                                          | FDR           |
| INTERPRO                  | IPR017900:4Fe-4S ferredoxin, iron-sulphur binding, conserved site | 3     | 0.8426966 | 0.001217217 | Q9CQA3, P61222, Q8K3I1                                                                                                         | 0.09631275432 |
| Annotation Cluster 18     | Enrichment Score:<br>1.6476167193215445                           |       |           |             |                                                                                                                                |               |
| Category                  | Term                                                              | Count | %         | PValue      | Genes                                                                                                                          | FDR           |
| UP_KW_BIOLOGICAL_P ROCESS | KW-0509~mRNA transport                                            | 7     | 1.9662921 | 0.003806516 | Q5U4D9, Q8BL97, Q8R0G9, O70133, Q6PPDM2, P84104, Q99JX7                                                                        | 0.04730955162 |
| Annotation Cluster 19     | Enrichment Score:<br>1.5583078211177934                           |       |           |             |                                                                                                                                |               |
| Category                  | Term                                                              | Count | %         | PValue      | Genes                                                                                                                          | FDR           |
| GOTERM_CC_DIRECT          | GO:0005764~lysosome                                               | 16    | 4.494382  | 0.003315368 | P08228, P57716, P23780, Q9Z0M5, P11438, P10852, Q9ESY9, P50516, P17439, P70318, Q9CQF9, P24668, P45377, Q3TCN2, Q8VEB4, P05201 | 0.04652210261 |
| Annotation Cluster 20     | Enrichment Score:<br>1.5036738713049727                           |       |           |             |                                                                                                                                |               |
| Category                  | Term                                                              | Count | %         | PValue      | Genes                                                                                                                          | FDR           |
| GOTERM_CC_DIRECT          | GO:0015629~actin cytoskeleton                                     | 11    | 3.0898876 | 0.003808661 | Q9JKF1, P59999, P70248, E9Q634, O70318, P13020, P21107, Q8VDD5, O70133, Q9WTT7, Q6IRU2,                                        | 0.05177398992 |
| Annotation Cluster 21     | Enrichment Score:<br>1.4497999795318788                           |       |           |             |                                                                                                                                |               |
| Category                  | Term                                                              | Count | %         | PValue      | Genes                                                                                                                          | FDR           |
| UP_KW_BIOLOGICAL_P ROCESS | KW-0249~Electron transport                                        | 11    | 3.0898876 | 1.16712E-05 | Q9CQA3, O09111, Q61093, Q9CZB0, Q8K3I1, Q9CZ13, Q8R1I1, Q9DB77, Q8R180, P62897, P00397                                         | 0.00061912631 |
| Annotation Cluster 22     | Enrichment Score:<br>1.4168460123066215                           |       |           |             |                                                                                                                                |               |
| Category                  | Term                                                              | Count | %         | PValue      | Genes                                                                                                                          | FDR           |

|                          |                                     |                                         |           |             |                                                                        |               |
|--------------------------|-------------------------------------|-----------------------------------------|-----------|-------------|------------------------------------------------------------------------|---------------|
| SMART                    | SM00382:AAA                         | 9                                       | 2.5280899 | 0.00065347  | P36371, O35379, P61222, P46471, Q9WUK4, P62334, P56480, P06795, P35601 | 0.02701010409 |
| INTERPRO                 | IPR003593:AAA+ ATPase domain        | 9                                       | 2.5280899 | 0.001224315 | P36371, O35379, P61222, P46471, Q9WUK4, P62334, P56480, P06795, P35601 | 0.09631275432 |
| Annotation Cluster 23    |                                     | Enrichment Score:<br>1.2694767495088586 |           |             |                                                                        |               |
| Category                 | Term                                | Count                                   | %         | PValue      | Genes                                                                  | FDR           |
| KEGG_PATHWAY             | mmu03430:Mismatch repair            | 5                                       | 1.4044944 | 0.001455378 | Q9CYR0, Q9CQ71, P37913, Q9WUK4, P35601                                 | 0.02131701364 |
| KEGG_PATHWAY             | mmu03420:Nucleotide excision repair | 6                                       | 1.6853933 | 0.0029459   | Q3U1J4, P54728, Q9CQ71, P37913, Q9WUK4, P35601                         | 0.04075161853 |
| UP_KW_BIOLOGICAL_PROCESS | KW-0235~DNA replication             | 7                                       | 1.9662921 | 0.004466235 | Q60972, Q60973, Q9CYR0, Q9CQ71, P37913, Q9WUK4, P35601                 | 0.0485703026  |
| KEGG_PATHWAY             | mmu03030:DNA replication            | 5                                       | 1.4044944 | 0.008247428 | Q9CYR0, Q9CQ71, P37913, Q9WUK4, P35601                                 | 0.0977909279  |
