# Supplementary material for: Biobased, biodegradable but not bio-neutral: about the effects of polylactic acid nanoparticles on macrophages
Source: Royal Society of Chemistry journal article supplement (doi:10.1039/d4en00335g), 2024-01-01
Supplement: d4en00335g5.pdf [file d4en00335g5.pdf]

Supplementary Table 4: list of mitochondrial proteins modulated in response to PLA beads

| Uniprot accession | Protein name                                                                                               | ratio PLA treated/control | Mann Whitney U value |
|-------------------|------------------------------------------------------------------------------------------------------------|---------------------------|----------------------|
| O08528            | Hexokinase-2                                                                                               | 1.09                      | 2                    |
| O08715            | A-kinase anchor protein 1, mitochondrial                                                                   | 2.1                       | 1                    |
| O08734            | Bcl-2 homologous antagonist/killer                                                                         | 2.1                       | 2                    |
| O09111            | NADH dehydrogenase [ubiquinone] 1 beta subcomplex subunit 11, mitochondrial                                | 0.78                      | 2                    |
| P00397            | Cytochrome c oxidase subunit 1                                                                             | 1.84                      | 2                    |
| P08249            | Malate dehydrogenase, mitochondrial                                                                        | 0.79                      | 2                    |
| P11440            | Cyclin-dependent kinase 1                                                                                  | 1.48                      | 0                    |
| P11928            | 2'-5'-oligoadenylate synthase 1A                                                                           | 2.05                      | 2                    |
| P20108            | Peroxiredoxin 3                                                                                            | 1.21                      | 0                    |
| P42125            | Enoyl-CoA delta isomerase 1, mitochondrial                                                                 | 0.65                      | 1                    |
| P45952            | Medium-chain specific acyl-CoA dehydrogenase, mitochondrial                                                | 0.89                      | 2                    |
| P53395            | Lipoamide acyltransferase component of branched-chain alpha-keto acid dehydrogenase complex, mitochondrial | 1.47                      | 1                    |
| P56383            | ATP synthase F(0) complex subunit C2, mitochondrial                                                        | 0.42                      | 2                    |
| P56480            | ATP synthase subunit beta, mitochondrial                                                                   | 1.18                      | 0                    |
| P60603            | Reactive oxygen species modulator 1                                                                        | 1.29                      | 2                    |
| P61222            | ATP-binding cassette sub-family E member 1                                                                 | 1.12                      | 2                    |
| P62897            | Cytochrome c, somatic                                                                                      | 0.79                      | 0                    |
| P63038            | 60 kDa heat shock protein, mitochondrial                                                                   | 0.86                      | 2                    |
| Q07813            | Apoptosis regulator BAX                                                                                    | 1.16                      | 0                    |
| Q6UPE1            | Electron transfer flavoprotein-ubiquinone oxidoreductase, mitochondrial                                    | 1.42                      | 1                    |
| Q8BGE6            | Cysteine protease ATG4B                                                                                    | 1.44                      | 0                    |
| Q8BMF4            | Dihydrolipoyllysine-residue acetyltransferase component of pyruvate dehydrogenase complex, mitochondrial   | 0.8                       | 1                    |
| Q8CG76            | Aflatoxin B1 aldehyde reductase member 2                                                                   | 1.64                      | 2                    |
| Q8K0D5            | Elongation factor G, mitochondrial                                                                         | 1.27                      | 2                    |
| Q8K3J1            | NADH dehydrogenase [ubiquinone] iron-sulfur protein 8, mitochondrial                                       | 1.81                      | 2                    |
| Q8R1I1            | Cytochrome b-c1 complex subunit 9                                                                          | 1.68                      | 0                    |
| Q91V92            | ATP-citrate synthase                                                                                       | 1.12                      | 1                    |
| Q921M7            | Protein FAM49B                                                                                             | 1.17                      | 0                    |

|        |                                                                               |      |   |
|--------|-------------------------------------------------------------------------------|------|---|
| Q99KI0 | Aconitate hydratase,<br>mitochondrial                                         | 1.15 | 2 |
| Q99KK9 | Probable histidine--tRNA<br>ligase, mitochondrial                             | 1.46 | 2 |
| Q9CQA3 | Succinate dehydrogenase<br>[ubiquinone] iron-sulfur<br>subunit, mitochondrial | 1.45 | 2 |
| Q9CQE3 | 28S ribosomal protein S17,<br>mitochondrial                                   | 1.8  | 2 |
| Q9CYR0 | Single-stranded DNA-<br>binding protein,<br>mitochondrial                     | 1.4  | 0 |
| Q9CZ13 | Cytochrome b-c1 complex<br>subunit 1, mitochondrial                           | 1.09 | 1 |
| Q9CZB0 | Succinate dehydrogenase<br>cytochrome b560 subunit,<br>mitochondrial          | 1.31 | 2 |
| Q9D6R2 | Isocitrate dehydrogenase<br>[NAD] subunit alpha,<br>mitochondrial             | 1.1  | 2 |
| Q9DB77 | Cytochrome b-c1 complex<br>subunit 2, mitochondrial                           | 1.22 | 0 |
| Q9DCZ4 | MICOS complex subunit<br>Mic26                                                | 2.16 | 1 |
| Q9JH15 | Isovaleryl-CoA<br>dehydrogenase,<br>mitochondrial                             | 0.71 | 2 |
| Q9QZD8 | Mitochondrial dicarboxylate<br>carrier                                        | 1.3  | 0 |
| Q9Z110 | Delta-1-pyrroline-5-<br>carboxylate synthase 1                                | 1.13 | 2 |
