# Supplementary material for: Biobased, biodegradable but not bio-neutral: about the effects of polylactic acid nanoparticles on macrophages
Source: Royal Society of Chemistry journal article supplement (doi:10.1039/d4en00335g), 2024-01-01
Supplement: d4en00335g6.pdf [file d4en00335g6.pdf]

Supplementary Table 5: list of ER proteins modulated in response to PLA beac

| Uniprot accession | Protein name                                                             | ratio PLA treated/control | Mann Whitney U value |
|-------------------|--------------------------------------------------------------------------|---------------------------|----------------------|
| B9EJ86            | Oxysterol-binding protein-related protein 8                              | 1.27                      | 0                    |
| O08547            | Vesicle-trafficking protein SEC22b                                       | 0.59                      | 0                    |
| O08795            | Glucosidase 2 subunit beta                                               | 0.87                      | 0                    |
| O08992            | Syntenin-1                                                               | 2.71                      |                      |
| O54692            | Centromere/kinetochore protein zw10 homolog                              | 1.57                      | 0                    |
| O70503            | Very-long-chain 3-oxoacyl-CoA reductase                                  | 1.12                      | 0                    |
| O88455            | 7-dehydrocholesterol reductase                                           | 2.33                      | 0                    |
| P35564            | Calnexin                                                                 | 0.8                       | 0                    |
| P35821            | Tyrosine-protein phosphatase non-receptor type 1                         | 1.75                      | 0                    |
| P61027            | Ras-related protein Rab-10                                               | 1.42                      | 0                    |
| P70704            | Phospholipid-transporting ATPase IA                                      | 0.49                      | 2                    |
| P97858            | Solute carrier family 35 member B1                                       | 1.43                      | 0                    |
| Q64430            | Copper-transporting ATPase 1                                             | 1.31                      | 2                    |
| Q6P5E4            | UDP-glucose:glycoprotein glucosyltransferase 1                           | 1.15                      | 2                    |
| Q6ZWQ7            | Signal peptidase complex subunit 3                                       | 1.36                      | 1                    |
| Q8BHN3            | Neutral alpha-glucosidase AB                                             | 1.17                      | 1                    |
| Q8CGZ0            | Calcium homeostasis ER protein                                           | 1.31                      | 0                    |
| Q8R1V4            | Transmembrane emp24 domain-containing protein 4                          | 0.84                      | 0                    |
| Q8VDP6            | CDP-diacylglycerol--inositol 3-phosphatidyltransferase                   | 1.78                      | 0                    |
| Q91YQ5            | Dolichyl-diphosphooligosaccharide--protein glycosyltransferase subunit 1 | 1.1                       | 0                    |
| Q9CPU4            | Microsomal glutathione S-transferase 3                                   | 1.15                      | 2                    |
| Q9DB25            | Dolichyl-phosphate beta-glucosyltransferase                              | 1.31                      | 1                    |
| Q9DBS1            | Transmembrane protein 43                                                 | 1.38                      | 0                    |
| Q9EPE9            | Endoplasmic reticulum transmembrane helix translocase                    | 0.68                      | 2                    |
| Q9EQH2            | Endoplasmic reticulum aminopeptidase 1                                   | 1.13                      | 2                    |
| Q9JHP7            | Protein O-glycosyltransferase 2                                          | 1.63                      | 1                    |
| Q9JLJ5            | Elongation of very long chain fatty acids protein 1                      | 2.87                      | 1                    |
| Q9QY76            | Vesicle-associated membrane protein-associated protein B                 | 1.57                      | 0                    |
| Q9WU81            | Glucose-6-phosphate exchanger SLC37A2                                    | 1.5                       | 2                    |
| Q9WV55            | Vesicle-associated membrane protein-associated protein A                 | 1.5                       | 2                    |
