# Supplementary material for: Biobased, biodegradable but not bio-neutral: about the effects of polylactic acid nanoparticles on macrophages
Source: Royal Society of Chemistry journal article supplement (doi:10.1039/d4en00335g), 2024-01-01
Supplement: d4en00335g7.pdf [file d4en00335g7.pdf]

Supplementary Table 6: list of lysosomal/endosomal proteins modulated in response to PLA beads

| Uniprot accession | Protein name                                                               | ratio PLA treated/control | Mann Whitney U value |
|-------------------|----------------------------------------------------------------------------|---------------------------|----------------------|
| Q8CGS4            | Charged multivesicular body protein 3                                      | 2.01                      |                      |
| Q3TCN2            | Putative phospholipase B-like 2                                            | 1.84                      | 2                    |
| P57716            | Nicastrin                                                                  | 1.66                      | 2                    |
| P50518            | V-type proton ATPase subunit E 1                                           | 1.6                       | 2                    |
| Q9Z0M5            | Lysosomal acid lipase/cholesteryl ester hydrolase                          | 1.51                      |                      |
| Q61093            | Cytochrome b-245 heavy chain                                               | 1.49                      | 1                    |
| Q9CQF9            | Prenylcysteine oxidase 1                                                   | 1.43                      |                      |
| P61027            | Ras-related protein Rab-10                                                 | 1.42                      |                      |
| Q64430            | Copper-transporting ATPase 1                                               | 1.31                      | 2                    |
| P11438            | Lysosome-associated membrane glycoprotein 1                                | 1.26                      | 2                    |
| P50516            | V-type proton ATPase catalytic subunit A                                   | 1.24                      |                      |
| P17426            | AP-2 complex subunit alpha-1                                               | 1.24                      | 2                    |
| P23780            | Beta-galactosidase                                                         | 1.18                      |                      |
| P45377            | Aldose reductase-related protein 2                                         | 1.18                      | 1                    |
| P62944            | AP-2 complex subunit beta                                                  | 1.18                      | 2                    |
| P61028            | Ras-related protein Rab-8B                                                 | 1.17                      |                      |
| Q8VEB4            | Phospholipase A2 group XV                                                  | 0.81                      | 2                    |
| Q63524            | Transmembrane emp24 domain-containing protein 2                            | 0.71                      | 2                    |
| P17439            | Lysosomal acid glucosylceramidase                                          | 0.7                       |                      |
| P24668            | Cation-dependent mannose-6-phosphate receptor                              | 0.64                      |                      |
| B5DEN9            | Vacuolar protein sorting-associated protein 28 homolog                     | 0.51                      |                      |
| Q9WTI7            | Unconventional myosin-Ic                                                   | 1.63                      |                      |
| Q5FWK3            | Rho GTPase-activating protein 1                                            | 1.63                      |                      |
| E9Q634            | Unconventional myosin-Ie                                                   | 1.4                       |                      |
| Q4LDD4            | Arf-GAP with Rho-GAP domain, ANK repeat and PH domain-containing protein 1 | 1.38                      | 2                    |
| O70318            | Band 4.1-like protein 2                                                    | 1.27                      |                      |
| P70248            | Unconventional myosin-If                                                   | 1.26                      |                      |
| Q9JKF1            | Ras GTPase-activating-like protein IQGAP1                                  | 1.12                      | 1                    |
| Q4V7C7            | Actin-related protein 3                                                    | 0.93                      | 2                    |
| Q8VDD5            | Myosin-9                                                                   | 0.92                      |                      |
| Q6IRU2            | Tropomyosin alpha-4 chain                                                  | 0.87                      | 2                    |
| P13020            | Gelsolin                                                                   | 0.82                      |                      |
| P21107            | Tropomyosin alpha-3 chain                                                  | 0.82                      | 2                    |
| P59999            | Actin-related protein 2/3 complex subunit 4                                | 0.7                       | 1                    |
| Q8BPU7            | Engulfment and cell motility protein 1                                     | 0.67                      | 2                    |
| Q8BHL5            | Engulfment and cell motility protein 2                                     | 0.42                      | 2                    |
