# Supplementary material for: Biobased, biodegradable but not bio-neutral: about the effects of polylactic acid nanoparticles on macrophages
Source: Royal Society of Chemistry journal article supplement (doi:10.1039/d4en00335g), 2024-01-01
Supplement: d4en00335g8.pdf [file d4en00335g8.pdf]

Supplementary Table 7: List of proteins linked to immune functions modulated in response to PLA beads

| Uniprot accession | Protein name                                                 | ratio PLA treated/control | Mann Whitney U value |
|-------------------|--------------------------------------------------------------|---------------------------|----------------------|
| A1L314            | MPEG-1                                                       | 1.32                      | 0                    |
| O70133            | ATP-dependent RNA helicase A                                 | 1.23                      | 1                    |
| P09581            | Macrophage colony-stimulating factor 1 receptor              | 1.44                      | 0                    |
| P10810            | Monocyte differentiation antigen CD14                        | 0.77                      | 0                    |
| P11680            | Properdin                                                    | 0.75                      | 0                    |
| P11928            | 2'-5'-oligoadenylate synthase 1A                             | 2.05                      | 2                    |
| P30993            | C5a anaphylatoxin chemotactic receptor 1                     | 1.17                      | 1                    |
| P36371            | Antigen peptide transporter 2                                | 1.49                      | 2                    |
| P83868            | Prostaglandin E synthase 3                                   | 1.44                      | 1                    |
| P98086            | Complement C1q subcomponent subunit A                        | 0.82                      | 0                    |
| Q60664            | Inositol 1,4,5-triphosphate receptor associated 2            | 1.28                      | 1                    |
| Q60875            | Rho guanine nucleotide exchange factor 2                     | 1.18                      | 0                    |
| Q61093            | Cytochrome b-245 heavy chain                                 | 1.49                      | 1                    |
| Q6P549            | Phosphatidylinositol 3,4,5-trisphosphate 5-phosphatase 2     | 1.33                      | 1                    |
| Q6R5N8            | Toll-like receptor 13                                        | 1.62                      | 1                    |
| Q8V193            | 2'-5'-oligoadenylate synthase 3                              | 1.27                      | 1                    |
| Q9D8Y7            | Tumor necrosis factor alpha-induced protein 8-like protein 2 | 2.06                      | 0                    |
| Q9DBS1            | Transmembrane protein 43                                     | 1.38                      | 0                    |
| Q9EQH2            | Endoplasmic reticulum aminopeptidase 1                       | 1.13                      | 2                    |
| Q9ESY9            | Gamma-interferon-inducible lysosomal thiol reductase         | 0.78                      | 0                    |
| P61027            | Ras-related protein Rab-10                                   | 1.42                      | 0                    |
| Q64324            | Syntaxin-binding protein 2                                   | 1.37                      | 2                    |
