# Supplementary material for: Biobased, biodegradable but not bio-neutral: about the effects of polylactic acid nanoparticles on macrophages
Source: Royal Society of Chemistry journal article supplement (doi:10.1039/d4en00335g), 2024-01-01
Supplement: d4en00335g9.pdf [file d4en00335g9.pdf]

Supplementary Table 8: List of proteins linked to redox homeostasis modulated in response to PLA beads

| Uniprot accession | Protein name                             | ratio PLA treated/control | Mann Whitney U value |
|-------------------|------------------------------------------|---------------------------|----------------------|
| P08228            | Superoxide dismutase [Cu-Zn]             | 0.71                      | 0                    |
| P20108            | Peroxi-redoxin 3                         | 1.21                      | 0                    |
| P45376            | Aldo-keto reductase family 1 member B1   | 0.84                      | 0                    |
| P45377            | Aldose reductase-related protein 2       | 1.18                      | 1                    |
| P47199            | Quinone oxidoreductase                   | 1.94                      | 0                    |
| Q61093            | Cytochrome b-245 heavy chain             | 1.49                      | 1                    |
| Q8C7K6            | Prenylcysteine oxidase-like              | 1.28                      | 2                    |
| Q8CG76            | Aflatoxin B1 aldehyde reductase member 2 | 1.64                      | 2                    |
| Q9CQF9            | Prenylcysteine oxidase 1                 | 1.43                      | 0                    |
| Q9CY64            | Biliverdin reductase A                   | 1.21                      | 1                    |
| Q9JMH6            | Thioredoxin reductase 1, cytoplasmic     | 1.09                      | 2                    |
| Q9Z2G9            | Oxidoreductase HT ATP2                   | 1.41                      | 0                    |
| P06795            | Multidrug resistance protein 1B          | 2.15                      | 0                    |
